1 **A novel membrane protein Hoka regulates septate junction organization and stem**  
2 **cell homeostasis in the *Drosophila* gut**

3

4 Yasushi Izumi<sup>1,2</sup>, Kyoko Furuse<sup>1</sup>, and Mikio Furuse<sup>1,2</sup>

5

6 <sup>1</sup>Division of Cell Structure, National Institute for Physiological Sciences, Okazaki,  
7 Japan

8 <sup>2</sup>Department of Physiological Sciences, SOKENDAI, Okazaki, Japan

9

10 **Address correspondence and proofs to:**

11 Yasushi Izumi, PhD, Division of Cell Structure, National Institute for Physiological  
12 Sciences, 5-1 Higashiyama, Myodaiji, Okazaki 444-8787, Japan

13 Tel: +81-564-59-5279; Fax: +81-564-59-5275; E-mail: yizumi@nips.ac.jp

14

15 **Running title:** A novel septate junction protein Hoka in the *Drosophila* gut

16

17 **Keywords:** *Drosophila*, midgut, smooth septate junction, epithelial cell, intestinal stem  
18 cells

19

20 **Summary statement:** Depletion of *hoka*, a gene encoding a novel septate junction  
21 protein, from the *Drosophila* midgut results in the disruption of septate junctions,  
22 intestinal barrier dysfunction, stem cell overproliferation, and epithelial tumors.

23

24 **Abbreviations:** aPKC: atypical protein kinase C, DGFP: destabilized green fluorescent  
25 protein, Dlg: Discs large, *da-GAL4*: *daughterless-GAL4*, dpERK: diphosphorylated  
26 ERK, EB: enteroblast, EC: enterocyte, EGFP: enhanced green fluorescent protein, EE:  
27 enteroendocrine cell, EMC: enteroendocrine mother cell, *esg<sup>ts</sup>-GAL4*: *escargot<sup>ts</sup>-GAL4*,  
28 ISC: intestinal stem cell, Luc: Luciferase, OELP: outer epithelial layer of the  
29 proventriculus, PH3: phospho-histone H3, pERM: phospho-Ezrin/Radixin/Moesin, pSJ:  
30 pleated septate junction, SJ: septate junction, sSJ: smooth septate junction, sSJ-proteins:  
31 specific molecular constituents of sSJs, Ssk: Snakeskin, ts: temperature-sensitive, Upd:  
32 Unpaired, Yki: Yorki.

33

#### 34 **Abstract**

35 Smooth septate junctions (sSJs) regulate the paracellular transport in the intestinal and  
36 renal system in arthropods. In *Drosophila*, the organization and physiological function  
37 of sSJs are regulated by at least three sSJ-specific membrane proteins: Ssk, Mesh, and  
38 Tsp2A. Here, we report a novel sSJ membrane protein Hoka, which has a single  
39 membrane-spanning segment with a short extracellular region having 13-amino acids,  
40 and a cytoplasmic region with three repeats of the Tyr-Thr-Pro-Ala motif. The larval  
41 midgut in *hoka*-mutants shows a defect in sSJ structure. Hoka forms a complex with  
42 Ssk, Mesh, and Tsp2A and is required for the correct localization of these proteins to  
43 sSJs. Knockdown of *hoka* in the adult midgut leads to intestinal barrier dysfunction,  
44 stem cell overproliferation, and epithelial tumors. In *hoka*-knockdown midguts, aPKC is  
45 up-regulated in the cytoplasm and the apical membrane of epithelial cells. The depletion  
46 of *aPKC* and *yki* in *hoka*-knockdown midguts results in reduced stem cell  
47 overproliferation. These findings indicate that Hoka cooperates with the sSJ-proteins

48 Ssk, Mesh, and Tsp2A to organize sSJs, and is required for maintaining intestinal stem  
49 cell homeostasis through the regulation of aPKC and Yki activities in the *Drosophila*  
50 midgut.

51

## 52 **Introduction**

53 Epithelia separate distinct fluid compartments within the bodies of metazoans.  
54 For this epithelial function, occluding junctions act as barriers that control the free  
55 diffusion of solutes through the paracellular pathway. Septate junctions (SJs) are  
56 occluding junctions in invertebrates (Furuse and Tsukita, 2006; Lane, 1994; Tepass and  
57 Hartenstein, 1994) and form circumferential belts along the apicolateral region of  
58 epithelial cells. In transmission electron microscopy, SJs are observed between the  
59 parallel plasma membranes of adjacent cells, with ladder-like septa spanning the  
60 intermembrane space (Lane, 1994, Tepass and Hartenstein, 1994). Arthropods have two  
61 types of SJs: pleated SJs (pSJs) and smooth SJs (sSJs) (Banerjee et al., 2006; Lane,  
62 1994; Tepass and Hartenstein, 1994; Jonusaite et al., 2016). pSJs are found in ectoderm  
63 derived epithelia and surface glia surrounding the nerve cord, whereas sSJs are found  
64 mainly in the endoderm derived epithelia, such as the midgut and gastric caeca (Lane,  
65 1994; Tepass and Hartenstein, 1994). Despite being derived from the ectoderm, the  
66 outer epithelial layer of the proventriculus (OELP) and the Malpighian tubules also  
67 possess sSJs (Lane, 1994; Tepass and Hartenstein, 1994). Further, pSJs and sSJs are  
68 distinguished by the arrangement of septa. For example, the septa of pSJs form regular  
69 undulating rows, whereas those in sSJs form regularly spaced parallel lines in the  
70 oblique sections in lanthanum-treated preparations (Lane and Swales, 1982; Lane,  
71 1994). To date, more than 20 pSJ-related proteins have been identified and characterized

72 in *Drosophila* (Banerjee et al., 2006; Izumi and Furuse, 2014; Tepass et al., 2001; Wu  
73 and Beitel, 2004; Rouka et al., 2020). In contrast, only three membrane-spanning  
74 proteins, i.e., Ssk, Mesh, and Tsp2A have been reported as specific molecular  
75 constituents of sSJs (sSJ-proteins) in *Drosophila* (Furuse and Izumi, 2017). Therefore,  
76 the mechanisms underlying sSJ organization and functional properties of sSJs remain  
77 poorly understood compared with pSJs. Ssk has four membrane-spanning domains; two  
78 short extracellular loops, cytoplasmic N- and C-terminal domains, and a cytoplasmic  
79 loop (Yanagihashi et al., 2012). Mesh is a cell-cell adhesion molecule, which has a  
80 single-pass transmembrane domain and a large extracellular region containing a NIDO  
81 domain, an Ig-like E set domain, an AMOP domain, a vWD domain, and a sushi domain  
82 (Izumi et al., 2012). Tsp2A is a member of the tetraspanin family of integral membrane  
83 proteins in metazoans with four transmembrane domains, N- and C-terminal short  
84 intracellular domains, two extracellular loops, and one short intracellular turn (Izumi et  
85 al., 2016). The loss of *ssk*, *mesh* and *Tsp2A* causes defects in the ultrastructure of sSJs  
86 and the barrier function against a 10 kDa fluorescent tracer in the *Drosophila* larval  
87 midgut (Yanagihashi et al., 2012; Izumi et al., 2012; Izumi et al., 2016). Ssk, Mesh, and  
88 Tsp2A interact physically and are mutually dependent for their sSJ localization (Izumi  
89 et al., 2012; Izumi et al., 2016). Thus, Ssk, Mesh, and Tsp2A act together to regulate the  
90 formation and barrier function of sSJs. Further, Ssk, Mesh, and Tsp2A are localized in  
91 the epithelial cell-cell contact regions in the *Drosophila* Malpighian tubules where sSJs  
92 are present (Tepass and Hartenstein, 1994; Yanagihashi et al., 2012; Izumi et al., 2012;  
93 Izumi et al., 2016). Recent studies have shown that the knockdown of *mesh* and *Tsp2A*  
94 in the epithelium of Malpighian tubules leads to defects in epithelial morphogenesis,  
95 tubule transepithelial fluid and ion transport, and paracellular macromolecule

96 permeability in the tubules (Jonusaite et al., 2020; Beyenbach et al., 2020). Thus,  
97 sSJ-proteins are involved in the development and maintenance of functional Malpighian  
98 tubules in *Drosophila*.

99         The *Drosophila* adult midgut consists of a pseudostratified epithelium, which is  
100 composed of absorptive enterocytes (ECs), secretory enteroendocrine cells (EEs),  
101 intestinal stem cells (ISCs), EC progenitors (enteroblasts: EBs), and EE progenitors  
102 (enteroendocrine mother cells: EMCs) (Micchelli and Perrimon, 2006; Ohlstein and  
103 Spradling, 2006; Guo and Ohlstein, 2015). The sSJs are formed between adjacent ECs  
104 and between ECs and EEs (Resnik-Docampo et al., 2017). To maintain midgut  
105 homeostasis, ECs and EEs are continuously renewed by proliferation and differentiation  
106 of the ISC lineage through the production of intermediate differentiating cells, EBs and  
107 EMCs. Recently, we and other groups reported that the knockdown of sSJ-proteins Ssk,  
108 Mesh, and Tsp2A in the midgut causes intestinal hypertrophy accompanied by the  
109 overproliferation of ECs and ISC (Salazar et al., 2018; Xu et al., 2019; Izumi et al.,  
110 2019, Chen et al., 2020). These results indicate that sSJs play a crucial role in  
111 maintaining tissue homeostasis through the regulation of stem cell proliferation and  
112 enterocyte behavior in the *Drosophila* adult midgut. Furthermore, Chen et al., (2018)  
113 have reported that the loss of *mesh* and *Tsp2A* in adult midgut epithelial cells causes  
114 defects in cellular polarization. although no remarkable defects in epithelial polarity  
115 were found in the first-instar larval midgut cells of *ssk*, *mesh*, and *Tsp2A*-mutants  
116 (Yanagihashi et al., 2012; Izumi et al., 2012; Izumi et al., 2016). Thus, sSJs may  
117 contribute to the establishment of epithelial polarity in the adult midgut.

118         During regeneration of the *Drosophila* adult midgut epithelium, various  
119 signaling pathways are involved in the proliferation and differentiation of the ISC

120 lineage (Jiang et al., 2016). Atypical Protein kinase C (aPKC) is an evolutionarily  
121 conserved key determinant of apical-basal epithelial polarity (Ohno et al., 2015).  
122 Importantly, Chen et al., (2018) have reported that aPKC is dispensable for the  
123 establishment of epithelial cell polarity in the *Drosophila* adult midgut. Goulas et al.,  
124 (2012) have reported that aPKC is required for differentiation of the ISC lineage in the  
125 midgut. The Hippo signaling pathway is involved in maintaining tissue homeostasis in  
126 various organs (Zheng and Pan, 2019). In the *Drosophila* midgut, inhibition of the  
127 Hippo signaling pathway activates the transcriptional co-activator Yorkie (Yki), which  
128 results in accelerated ISC proliferation via the Unpaired (Upd)-Jak-Stat signaling  
129 pathway (Karpowicz et al., 2010; Ren et al., 2010; Shaw et al., 2010). Recent studies  
130 have shown that Yki is involved in ISC overproliferation caused by the depletion of  
131 sSJ-proteins in the midgut (Xu et al., 2019; Chen et al., 2020). Furthermore, Xu et al.  
132 (2019) have shown that aPKC is activated in the *Tsp2A*-RNAi treated midgut, leading to  
133 activation of its downstream target Yki and causing ISC overproliferation through the  
134 activation of the Upd-JAK-Stat signaling pathway. Thus, crosstalk between aPKC and  
135 the Hippo signaling pathways appear to be involved in ISC overproliferation caused by  
136 *Tsp2A* depletion.

137           To further understand the molecular mechanisms underlying sSJ organization,  
138 we performed a deficiency screen for Mesh localization and identified the integral  
139 membrane protein Hoka as a novel component of *Drosophila* sSJs. Hoka consists of a  
140 short extracellular region and the characteristic repeating four-amino acid motifs in the  
141 cytoplasmic region, and is required for the organization of sSJ structure in the midgut.  
142 Hoka and Ssk, Mesh, and *Tsp2A* show interdependent localization at sSJs and form a  
143 complex with each other. The knockdown of *hoka* in the adult midgut results in

144 intestinal barrier dysfunction, aPKC- and Yki-dependent ISC overproliferation, and  
145 epithelial tumors. Thus, Hoka plays an important role in sSJ organization and in  
146 maintaining ISC homeostasis in the *Drosophila* midgut.

147

## 148 **Results**

### 149 **Hoka is involved in sSJ formation**

150 We previously queried *Drosophila* strains that were defective in sSJ  
151 accumulation of Mesh using a genetic screen for a chromosomal deficient stock from  
152 the Bloomington Deficiency Kit. We found several deficiencies that caused an  
153 abrogated sSJ accumulation of Mesh in the stage 16 embryo OELP (Izumi et al., 2016).  
154 The *Tsp2A* gene was identified as being responsible for Mesh localization in the screen  
155 (Izumi et al., 2016), and we found that the OELP of Df(3L)BSC371 (deleted segment:  
156 64C1-64E1) showed cytoplasmic distribution of Mesh. To identify the precise genomic  
157 region responsible for the phenotype, we observed the Mesh distribution with other  
158 deficiencies overlapping with Df(3L)BSC371. The OELP of Df(3L)ED210 (deleted  
159 segment: 64B9-64C13) (Fig. 1A, B) and Df(3L)Exel6102 (deleted segment:  
160 64B13-64C4) exhibited a cytoplasmic distribution phenotype for Mesh but not that of  
161 Df(3L)Exel6103 (deleted segment: 64C4-64C8), and the phenotype for Df(3L)BSC371  
162 was mapped to the 64C1-64C4 interval. Within the genomic region 64C1-64C4, we  
163 focused on *CG13704* (Fig. 1C) as it was highly expressed in the midgut and Malpighian  
164 tubules (<http://flybase.org/reports/FBgn0035583>). *CG13704* encodes a putative  
165 single-pass transmembrane protein of 136 amino acids with a signal peptide and a  
166 transmembrane region (Fig. 1E), which is conserved in insects alone. We named the  
167 CG13704 protein ‘Hoka’ based on its immunostaining images in the midgut (see below;

168 Hoka means honeycomb in Japanese). The mature Hoka protein appears to have a short  
169 N-terminal extracellular region (13 amino acids) after cleavage of the signal peptide  
170 (<https://www.uniprot.org/uniprot/Q8SXS4>). Interestingly, the C-terminal region is  
171 threonine-rich and includes three tyrosine-threonine-proline-alanine (YTPA) motifs.  
172 Multiple sequence alignment of Hoka using Multiple Alignment using Fast Fourier  
173 Transform (MAFFT) revealed that three types of Hoka homologs (three, two, and single  
174 YTPA motif-containing homologs) are present in *Drosophila* (Fig. 1E, S1). The  
175 mosquito homologs have a single YTPA motif, and the butterfly homologs have a single  
176 similar YQPA motif (Fig. S1).

177 To examine whether Hoka is associated with sSJs, we expressed C-terminally  
178 GFP-tagged Hoka (Hoka-GFP) in flies using *da*-GAL4 (Fig. 1F–F”, see below). In the  
179 stage 16 OELP, Hoka-GFP was detected in the apicolateral region with some  
180 cytoplasmic aggregates. Mesh colocalized with Hoka-GFP in the apicolateral region  
181 (Fig. 1F’, F”), and therefore, we characterized Hoka as an sSJ-associated molecule.

182 To investigate whether Hoka is involved in sSJ formation, we generated  
183 *hoka*-mutants using the CRISPR/Cas9 method provided by NIG-Fly (Kondo and Ueda,  
184 2013). We obtained three independent *hoka*-mutant strains (*hoka*<sup>x113</sup>, *hoka*<sup>x127</sup>, and  
185 *hoka*<sup>x211</sup>), all of which had small indel mutations encompassing the target site (Fig. 1D).  
186 These *hoka*-mutant embryos hatched into first-instar larvae but died at this stage (data  
187 not shown). All *hoka*-mutants had frameshifts and premature stop codons. In the  
188 *hoka*<sup>x113</sup>, *hoka*<sup>x127</sup>, and *hoka*<sup>x211</sup> mutant stage 16 OELP, Mesh was diffusely distributed in  
189 the cytoplasm (Fig. S2F’–I”). Among these mutant strains, we mainly used the *hoka*<sup>x211</sup>  
190 mutant for further experiments. To confirm that the lack of *hoka* caused cytoplasmic  
191 distribution of Mesh, we expressed Hoka-GFP in *hoka*-mutant flies using *da*-GAL4.



192 The apicolateral accumulation of Mesh in the OELP was recovered and Hoka-GFP  
193 colocalized with Mesh in the Hoka-GFP expressing *hoka*-mutant OELP (Fig. 1I–I’),  
194 whereas Mesh remained in the cytoplasm of the control *hoka*-mutant OELP without  
195 Hoka-GFP expression (Fig. 1 G–H’). These observations indicate that Hoka is  
196 responsible for sSJ organization.

197

### 198 **Hoka is a novel sSJ-protein**

199 To determine the expression pattern and the subcellular localization of  
200 endogenous Hoka, we used two anti-Hoka antibodies that were raised against the  
201 C-terminal cytoplasmic region of Hoka. In a western blot analysis, the anti-Hoka  
202 antibodies detected an intense ~21 kDa band in the extracts from whole wild-type  
203 first-instar larvae (Fig. S2A). The ~21 kDa band was absent in *hoka*-mutant extracts  
204 (Fig. S2A), indicating that the ~21 kDa band represents Hoka. Immunofluorescence  
205 microscopy analyses revealed that an anti-Hoka antibody (29-1) labeled the midgut and  
206 the apicolateral region of the OELP in late-stage embryos (Fig. 2A, A’, S2F). The  
207 staining pattern of the OELP with the antibody overlapped that of the anti-Mesh  
208 antibody (Fig. 2A’, S2F–F’). Furthermore, the immunoreactivity of the antibody in the  
209 OELP and midgut was reduced in the *hoka*-mutant embryos (Fig. S2G–I),  
210 demonstrating the specificity of the anti-Hoka antibody. Immunofluorescence staining  
211 of the first-instar larvae revealed honeycomb-like signals for Hoka in the midgut, OELP,  
212 and Malpighian tubules, but not in the foregut and hindgut (Fig. 2B, C). At a higher  
213 magnification, staining with the anti-Hoka antibody overlapped with that of the  
214 anti-Mesh antibody in the apicolateral region of the midgut epithelial cells (Fig. 2E–E’).  
215 The anti-Hoka antibody also labeled the cell-cell contacts in adult midgut epithelial

216 cells (Fig. 2D) and coincided with the staining of the anti-Mesh antibody in the  
217 apicolateral region (Fig. 2F–F’). Taken together, these observations indicate that Hoka  
218 is a component of sSJs in *Drosophila* from the embryo to adulthood.

219 We next investigated whether the localization of Hoka is affected by the loss of  
220 Mesh, Ssk, or Tsp2A. In the *Df(3L)ssk*, *mesh*<sup>04955</sup>, and *Tsp2A*<sup>1-2</sup> mutant first-instar  
221 larval midgut epithelial cells, Hoka failed to localize to the apicolateral region but was  
222 distributed diffusely and formed aggregates in the cytoplasm (Fig. 2H, I, J), although  
223 Dlg was present in the apicolateral region (Fig. 2 H’, I’, J’). Thus, Ssk, Mesh, and Tsp2A  
224 are required for the sSJ localization of Hoka.

225

## 226 **Hoka is required for the initial assembly of sSJ-proteins**

227 We next examined Hoka distribution during sSJ formation using  
228 immunofluorescence staining of wild-type embryos from stage 14 to stage 16. In the  
229 OELP of stage 14 embryos, Hoka was distributed in the cytoplasm and along the lateral  
230 membranes (Fig. S3A), and was localized along the lateral membrane with partial  
231 accumulation in the apicolateral region in the stage 15 OELP (Fig. S3B). In the stage 16  
232 OELP, Hoka accumulated at the apicolateral region (Fig. S3C), suggesting that it is  
233 incorporated into the sSJs during stage 15 to stage 16 of embryonic development. These  
234 signals are specific for Hoka, as they were absent in the *hoka*-mutant (Fig. S3D–F).  
235 Notably, the sSJ targeting property of Hoka was similar to that of Mesh during sSJ  
236 formation of OELP (Fig. S3A’–C’).

237 To test whether the *hoka*-mutation affects the initial assembly of sSJ-proteins,  
238 we monitored the distribution of Ssk, Mesh, and Tsp2A during sSJ maturation in the  
239 OELP of wild-type and *hoka*-mutant embryos. In the wild-type OELP, a faint

240 apicolateral distribution of Ssk, Mesh, and Tsp2A was observed at stage 15 (Fig. S3B',  
241 H, N), and they were detectable in the apicolateral region at stage 16 (Fig. S3C', I, O).  
242 By contrast, in the *hoka*-mutant OELP, Ssk, Mesh, and Tsp2A failed to accumulate in  
243 the apicolateral region during stage 15 to stage 16 of development (Fig. S3E'–E'', F'–F'',  
244 K, L, Q, R). Together, these results indicate that Hoka is required for the initial  
245 assembly of sSJ-proteins in the OELP.

246

### 247 **Hoka is required for efficient localization of sSJ-proteins to the apicolateral region**

248 We next observed the distribution of sSJ-proteins in the *hoka*-mutant larval  
249 OELP and midgut. As reported previously, Dlg, Ssk, Mesh, and Tsp2A are present in  
250 sSJs in the wild-type first-instar larval OELP and midgut (Yanagihashi et al., 2012;  
251 Izumi et al., 2012; Izumi et al., 2016) (Fig. 3A', C–E, I', K–M). Interestingly, in the  
252 *hoka*-mutant first-instar larval OELP, Ssk was distributed in the apical and the  
253 apicolateral region (Fig. 3F), and Mesh and Tsp2A were present in the apicolateral  
254 region (Fig. 3G, H). Dlg was localized at the apicolateral region (Fig. 3B'). These data  
255 are in contrast to the observation that Mesh and Tsp2A were distributed diffusely in the  
256 cytoplasm, and Ssk was mislocalized to the apical and the lateral membranes in the  
257 *hoka*-mutant stage 16 OELP (Fig. S3F', L, R). In the *hoka*-mutant first-instar larval  
258 midgut epithelial cells, Ssk was mislocalized to the apical and lateral membrane (Fig.  
259 3N), and Mesh and Tsp2A were mislocalized along the lateral membrane (Fig. 3O, P).  
260 Further, in these larvae, Ssk, Mesh, and Tsp2A were found to be accumulated in the  
261 apicolateral region (Fig. 3Q–S). Dlg was localized in the apicolateral region (Fig. 3J').  
262 Taken together, these results indicate that Hoka is required for the efficient localization  
263 of Ssk, Mesh, and Tsp2A to the apicolateral region in epithelial cells.

264 Western blot analyses revealed that the densities of the main bands of Ssk  
265 (~15 kDa) and Tsp2A (~21 kDa) were not significantly changed in *hoka*-mutant larva,  
266 compared with wild-type larvae (Fig. S2B, C). However, the density of Mesh at ~200  
267 kDa and ~90 kDa in the *hoka*-mutant appeared to be increased compared to the  
268 wild-type (Fig. S2E), suggesting that Hoka may be involved in the regulation of Mesh  
269 protein levels.

270

### 271 **Hoka is required for the proper organization of the sSJ structure**

272 To investigate the role of Hoka in the organization of the sSJ structure, the  
273 ultrastructure of the *hoka*-mutant first-instar larval midgut was examined by electron  
274 microscopy in ultrathin sections. In the wild-type midgut, sSJs were observed as parallel  
275 plasma membranes with ladder-like septa in the apicolateral region of bicellular  
276 contacts (Fig. 4A, B). In the *hoka*-mutant midgut, proper sSJ structures were barely  
277 detectable at the apicolateral region of bicellular contacts (Fig. 4C–H), although  
278 ladder-like structures were occasionally visible (Fig. 4C–E, brackets). Large gaps were  
279 often formed between the apicolateral membranes of adjacent cells (Fig. 4F–H,  
280 asterisks). Thus, sSJs fail to form correctly in the *hoka*-mutant midgut although Ssk,  
281 Mesh, and Tsp2A are present in the lateral regions (Fig. 3N–S). These results indicate  
282 that Hoka is required for the proper organization of sSJ structure.

283

### 284 **Hoka forms a complex with Ssk, Mesh, and Tsp2A**

285 As Ssk, Mesh and Tsp2A form a complex *in vivo* (Izumi et al., 2012; Izumi et  
286 al., 2016), we examined whether Hoka is physically associated with Ssk, Mesh, and  
287 Tsp2A. *Drosophila* embryonic extracts were immunoprecipitated using anti-Hoka

288 antibodies, and endogenous Ssk and Mesh were coprecipitated with Hoka (Fig. 5A).  
289 Additionally, Hoka was coimmunoprecipitated with Ssk and Mesh from embryonic  
290 extracts with anti-Ssk and anti-Mesh antibodies, respectively (Fig. 5B). Neither Hoka,  
291 Mesh, nor Ssk was precipitated by the pre-immune sera or the control IgG (Fig. 5A, B).  
292 Embryos expressing enhanced GFP (EGFP)-Tsp2A with the *daughterless* (*da*)-GAL4  
293 driver were subjected to immunoprecipitation with anti-GFP antibodies, and  
294 EGFP-Tsp2A was found to coprecipitate with endogenous Hoka (Fig. 5C). Hoka was  
295 not precipitated from EGFP-Tsp2A-expressing embryos with the control IgG, or  
296 EGFP-expressing embryos with the anti-GFP antibody (Fig. 5C). These results indicate  
297 that Hoka forms a complex with Ssk, Mesh, and Tsp2A *in vivo*.

298

### 299 **Knockdown of *hoka* in the adult ECs leads to increased stem cell proliferation**

300         Recently, we and other groups reported that the knockdown of *ssk*, *mesh*, or  
301 *Tsp2A* in adult ECs led to a remarkably shortened lifespan in adult flies, increased ISC  
302 proliferation, and intestinal hypertrophy, accompanied by the accumulation of ECs in  
303 the midgut (Salazar et al., 2018; Xu et al., 2019; Izumi et al., 2019; Chen et al., 2020).  
304 Therefore, we investigated whether the knockdown of *hoka* from adult ECs also caused  
305 similar phenotypes as observed with the knockdown of other sSJ-proteins. To  
306 knockdown *hoka* in the adult midgut, inducible *hoka*-RNAi was performed using the  
307 Gal4/UAS system with an EC-specific driver *Myo1A*-GAL4 and the  
308 temperature-sensitive (ts) GAL4 repressor, *tubGal80<sup>ts</sup>* (McGuire et al., 2004; Jiang et al.,  
309 2009). *Myo1A*-Gal4 *tubGal80<sup>ts</sup>*, UAS-*Luciferase* (*Luc*)-RNAi (control), or  
310 UAS-*hoka*-RNAi (13704R-1, *hoka*IR-L or *hoka*IR-S; Fig. 1C), flies were raised to  
311 adults at 18°C (permissive temperature) and then shifted to 29°C (non-permissive

312 temperature) to inactivate GAL80, leading to the activation of the GAL4/UAS system to  
313 express each UAS-driven transgene. Western blot analysis of lysates from the control  
314 and the *hoka*-RNAi midgut showed that the Hoka protein level was decreased in the  
315 *hoka*-RNAi midgut, compared to the control midgut (Fig. 6A). In the *hoka*-RNAi  
316 midgut, Ssk, Mesh, Tsp2A, and Dlg were still observed in the lateral membrane of the  
317 ECs (Fig. S4). This is consistent with the observation that Ssk, Mesh, and Tsp2A were  
318 distributed to the lateral or apicolateral region in the *hoka*-mutant larval midgut (Fig.  
319 3N-S). Adult flies expressing *hoka*-RNAi had a shortened life span compared to the  
320 control flies (Fig. 6B). We also examined whether the barrier function of the midgut was  
321 disrupted in *hoka*-RNAi flies. According to the method for a Smurf assay (Rera et al.,  
322 2011; Rera et al., 2012), flies were fed a non-absorbable 800-Da blue food dye in  
323 sucrose solution. At 5 days after transgene induction, the knockdown of *hoka* in ECs led  
324 to a significant increase in flies with blue dye throughout their body cavity, indicating a  
325 dysfunction in the midgut barrier (Fig. 6D). The extent of midgut barrier dysfunction in  
326 the flies further increased at 8 days after transgene induction, compared with  
327 age-matched controls (Fig. 6C, D). Thus, Hoka contributes to the epithelial barrier  
328 function in the adult midgut.

329         Next, we examined whether ISC proliferation was increased in the *hoka*-RNAi  
330 midgut. Staining the midgut with the phospho-histone H3 (PH3) antibody for the  
331 mitotic marker, we found that PH3-positive cells were markedly increased in the  
332 *hoka*-RNAi midgut, compared with the midgut in controls (Fig. 7A-C, J).  
333 Immunostaining of the midgut with an antibody against Delta, an ISC marker (Ohlstein  
334 and Spradling, 2006), showed that ISCs were increased in the *hoka*-RNAi midgut,  
335 compared with the midgut in controls (Fig. 7A-C). We also confirmed that the

336 PH3-positive cells were Delta-positive (Fig. 7B, C). The expression of an additional  
337 RNAi line for *hoka* (*hokaIR-S*) in ECs also caused increased ISC proliferation (Fig. 7J).  
338 These results indicate that knockdown of *hoka* in ECs leads to increased ISC  
339 proliferation.

340         During the adult midgut epithelial regeneration, the Ras-MAP kinase and the  
341 Jak-Stat signaling pathways are involved in increased ISC proliferation (Beebe et al.,  
342 2010; Buchon et al., 2010; Karpowicz et al., 2010; Shaw et al., 2010; Biteau and Jasper,  
343 2011; Jiang et al., 2009; Jiang et al., 2011; Osman et al., 2012; Zhou et al., 2013). These  
344 pathways are activated in the *ssk*, *mesh*, and *Tsp2A*-deficient midgut (Izumi et al., 2019).  
345 Therefore, we observed whether these signaling pathways were activated in the  
346 *hoka*-RNAi midgut. To monitor the Ras-MAP kinase pathway activity, we examined the  
347 levels of diphosphorylated ERK (dpERK) (Gabay et al., 1997). In control flies, dpERK  
348 signals were barely detectable in the midgut (Fig. 7D). In contrast, intense dpERK  
349 signals were found in the *hoka*-RNAi midgut (Fig. 7E, F), indicating that the Ras-MAP  
350 kinase pathway was activated in ISCs. To monitor the Jak-Stat pathway activity, we  
351 used a Stat92E reporter line to drive the expression of the destabilized green fluorescent  
352 protein (DGFP) (10xSTAT-DGFP). In the control midgut, a few DGFP-positive cells  
353 were observed (Fig. 7G), whereas DGFP-positive cells were markedly increased in the  
354 *hoka*-RNAi midgut (Fig. 7H, I). Collectively, these results demonstrate that the  
355 knockdown of *hoka* in ECs results in the activation of both the Ras-MAP kinase and the  
356 Jak-Stat signaling pathways in the midgut.

357         We next evaluated the organization of the *hoka*-RNAi midgut epithelium. At 10  
358 days after transgene induction, a simple epithelium in which ECs expressed CD8-GFP  
359 driven by *Myo1A*-Gal4 was observed in the control midgut (Fig. 7K). The organization

360 of the epithelium was disrupted in the *hoka*-RNAi midgut where several ECs  
361 accumulated in the posterior midgut lumen (Fig. 7L, M). In the posterior part of the  
362 midgut, the diameter was significantly expanded, compared to the control midgut (Fig.  
363 7Q). The ECs exhibited a variety of aberrant appearances, implying a polarity defect  
364 (Fig. 7N–P”). Aberrant distribution of the apical membrane marker  
365 phospho-Ezrin/Radixin/Moesin (pERM) (Chen et al., 2018) and Dlg, a marker for the  
366 apicolateral membrane, was observed in the *hoka*-RNAi ECs (Fig. 7O–P”). Thus,  
367 knockdown of *hoka* in ECs causes intestinal tumor accompanied by the accumulation of  
368 ECs in the midgut lumen, indicating that Hoka is required for maintaining intestinal  
369 homeostasis in the adult fly. We performed *hoka*-RNAi in ISCs/EBs using an *escargot*<sup>Δs</sup>  
370 (*esg*<sup>Δs</sup>)-GAL4 driver and observed increased ISC proliferation and accumulation of ECs  
371 in the midgut (Fig. S5), suggesting that Hoka function is required for ISC and/or EBs to  
372 regulate ISC behavior in the adult midgut.

373

#### 374 **aPKC and Yki are involved in ISC overproliferation caused by *hoka*-RNAi**

375 In a recent study, the reduced expression of aPKC and the Hippo transcriptional  
376 coactivator Yki in *Tsp2A*-RNAi ISCs/EBs or ECs led to the reduction of  
377 *Tsp2A*-RNAi-induced ISC overproliferation in the midgut (Xu et al., 2019). Xu et al.  
378 also showed that the expression of *Tsp2A*-RNAi in the midgut increases aPKC staining  
379 in the cell border membrane. We examined whether aPKC staining was increased in the  
380 *Myo1A*<sup>Δs</sup>-GAL4-driven *hoka*-RNAi midgut. In the control midgut, aPKC staining was  
381 barely detectable, but the signal intensity of aPKC staining was significantly increased  
382 in the *hoka*-RNAi midgut, compared to the control midgut (Fig. 8A–C). In the  
383 longitudinal cross-sections of the control midgut, apical membrane aPKC staining was



384 occasionally observed in cells with a small nucleus (presumably ISCs) (Fig. 8D–D,” G–  
385 G,” arrowhead). aPKC has been reported to localize asymmetrically in the apical  
386 membrane of ISCs and regulates the differentiation of ISCs to EBs (Goulas et al., 2012).  
387 Interestingly, in the *hoka*-RNAi midgut, apical membrane staining of aPKC was often  
388 found in the cells mounted by other cells (Fig. 8E–E,” F–F,” H–H,” arrow). There are  
389 large and small nuclei-containing cells in the apical aPKC-localizing cells (Fig. 8E–E”,  
390 F–F”, H–H”). The apical aPKC staining partially overlapped with F-actin staining (Fig.  
391 8E”, F”) and Dlg staining (Fig. 8H”). To clarify the cell types in which apical aPKC was  
392 observed, we expressed CD8-GFP together with *hoka*-RNAi using the *Myo1A<sup>ts</sup>*-GAL4  
393 in the midgut and stained the midgut with an anti-Delta antibody. Here, GFP and  
394 Delta-positive cells were identified as ECs and ISCs, respectively. In the control midgut,  
395 apical aPKC staining was found in the Delta-positive ISCs (Fig. 8I–I”). In the  
396 *hoka*-RNAi midgut, three types of apical aPKC-localizing cells were observed (Fig. 8J–  
397 J”, K–K”): the Delta-positive ISCs (arrowheads), the Delta and CD8-GFP-negative cells  
398 (presumably EBs and/or EEs) (arrows), and the Delta-negative and CD8-GFP-positive  
399 cells (EC-like cells) (yellow arrows). These results indicate that aPKC can be apically  
400 localized in ISCs and the differentiated cells in the *hoka*-RNAi midgut.

401         Next, we investigated whether the depletion of *aPKC* and *yki* from *hoka*-RNAi  
402 ECs results in a reduction in ISC overproliferation caused by *hoka*-RNAi. To deplete the  
403 expression of *aPKC* and *yki* in *hoka*-RNAi ECs, we used *aPKC* (HMS01411) and *yki*  
404 (JF03119) RNAi lines, both of which efficiently reduced ISC overproliferation caused  
405 by the *Tsp2A*-RNAi (Xu et al., 2019). Expression of *hoka*-RNAi together with  
406 *aPKC*-RNAi or *yki*-RNAi by *Myo1A<sup>ts</sup>*-GAL4 in ECs significantly reduced ISC  
407 overproliferation, compared to the *hoka*-RNAi and the *Luc*-RNAi midgut (Fig. 8L,

408 S6A–D). Accumulation of cells in the midgut lumen was still observed in the  
409 *hoka*-RNAi together with *aPKC*-RNAi or *yki*-RNAi midguts (Fig. S6E–H), probably  
410 due to the high rate of ISC proliferation in these midguts (Fig. 8L). Taken together,  
411 these results indicate that aPKC and Yki activities mediate ISC overproliferation caused  
412 by *hoka*-RNAi in the ECs.

413

#### 414 **Discussion**

415         The identification of Ssk, Mesh, and Tsp2A has provided an experimental  
416 system to analyze the role of sSJs in the *Drosophila* midgut (Furuse and Izumi, 2017).  
417 Recent studies have shown that sSJs regulate the epithelial barrier function and also ISC  
418 proliferation and EC behavior in the midgut (Salazar et al., 2018; Xu et al., 2019; Izumi  
419 et al., 2019; Chen et al., 2020). Furthermore, sSJs are involved in epithelial  
420 morphogenesis, fluid transport, and macromolecule permeability in the Malpighian  
421 tubules (Jonusaite et al., 2020; Beyenbach et al., 2020). Here, we have reported the  
422 identification of a novel sSJ-associated membrane protein Hoka. Hoka is required for  
423 the efficient accumulation of other sSJ-proteins at sSJs and the correct organization of  
424 sSJ structure. The knockdown of *hoka* in the adult midgut leads to intestinal barrier  
425 dysfunction, increased ISC proliferation mediated by aPKC and Yki activities, and  
426 epithelial tumors. Thus, Hoka contributes to sSJ organization and maintaining ISC  
427 homeostasis in the *Drosophila* midgut.

428

#### 429 **The unique primary structure of Hoka homolog proteins**

430         Arthropod sSJs have been classified together based on their morphological  
431 similarity (Green and Bergquist, 1982; Lane, 1994). The identification of sSJ proteins in

432 *Drosophila* has provided an opportunity to investigate whether sSJs in various  
433 arthropod species share similarities at the molecular level. However, Hoka homolog  
434 proteins appear to be conserved only in insects upon a database search (data not shown),  
435 suggesting compositional variations in arthropod sSJs.

436 Interestingly, the cytoplasmic region of Hoka includes three YTPA motifs. The  
437 same or similar amino acid motifs are also present in the Hoka homologs of other  
438 insects, such as other *Drosophila* species, mosquitos, and a butterfly (YQPA motif)  
439 although the number of these motif(s) vary (1 to 3 in *Drosophila* species, 1 in mosquitos,  
440 1 in a butterfly). The extensive conservation of the YTPA/YQPA motif in insects  
441 suggests that the motif plays a critical role in the molecular function of Hoka homologs.  
442 It would be interesting to investigate the role of the YTPA/YQPA motif in sSJ  
443 organization.

444 The extracellular region of Hoka appears to be composed of 13 amino acids  
445 alone after the cleavage of the signal peptide, which is too short to bridge the 15–20 nm  
446 intercellular space of sSJs (Lane, 1994; Tepass and Hartenstein, 1994). Thus, Hoka is  
447 unlikely to act as a cell adhesion molecule in sSJs. Indeed, the overexpression of  
448 Hoka-GFP in *Drosophila* S2 cells did not induce cell aggregation, which is a criterion  
449 for cell adhesion activity (data not shown).

450

#### 451 **The role of Hoka in sSJ organization**

452 The loss of an sSJ-protein results in the mislocalization of other sSJ-proteins  
453 (Izumi et al., 2012; Izumi et al., 2016), indicating that sSJ-proteins are mutually  
454 dependent for their sSJ localization. In the *ssk*-deficient midgut, Mesh and Tsp2A were  
455 distributed diffusely in the cytoplasm (Izumi et al., 2012; Izumi et al., 2016). In the

456 *mesh*-mutant midgut, Ssk was localized at the apical and lateral membranes, whereas  
457 Tsp2A was distributed diffusely in the cytoplasm (Izumi et al., 2012; Izumi et al., 2016).  
458 In the *Tsp2A*-mutant midgut, Ssk was localized at the apical and lateral membranes,  
459 whereas Mesh was distributed diffusely in the cytoplasm (Izumi et al., 2016). Among  
460 these three mutants, the mislocalization of Ssk, Mesh, or Tsp2A is consistent; Mesh and  
461 Tsp2A were distributed in the cytoplasm, whereas Ssk was localized at the apical and  
462 lateral membranes. However, in the *hoka*-mutant larval midgut, Mesh and Tsp2A were  
463 distributed along the lateral membrane, whereas Ssk was mislocalized to the apical and  
464 lateral membranes. Interestingly, in some *hoka*-mutant midguts, Ssk, Mesh, and Tsp2A  
465 were localized to the apicolateral region, as observed in the wild-type midgut.  
466 Differences in subcellular misdistribution of sSJ-proteins between the *hoka*-mutant and  
467 the *ssk*, *mesh*, and *Tsp2A*-mutants indicate that the role of Hoka in the process of sSJ  
468 formation is different from that of Ssk, Mesh, or Tsp2A. Ssk, Mesh, and Tsp2A may  
469 form the core complex of sSJs, and these proteins are indispensable for the generation  
470 of sSJs, whereas Hoka facilitates the arrangement of the primordial sSJs at the correct  
471 position, i.e., the apicolateral region. This Hoka function may also be important for  
472 rapid paracellular barrier repair during the epithelial cell turnover in the adult midgut.  
473 Notably, during the sSJ formation process of OELP, the sSJ targeting property of Hoka  
474 was similar to that of Mesh, implying that Hoka may have a close relationship with  
475 Mesh, rather than Ssk and Tsp2A during sSJ development.

476

#### 477 **The role of Hoka in intestinal homeostasis**

478         The knockdown of *hoka* in the adult midgut leads to a shortened lifespan in  
479 adult flies, intestinal barrier dysfunction, increased ISC proliferation, and the

480 accumulation of ECs. These results are consistent with the recent observation for *ssk*,  
481 *mesh*, and *Tsp2A*-RNAi in the adult midgut (Salazar et al., 2018; Xu et al., 2019; Izumi  
482 et al., 2019; Chen et al., 2020). However, the defects observed in the *hoka*-RNAi midgut  
483 were less severe than in flies with RNAi for other sSJ-proteins (Izumi et al., 2019). At 5  
484 days after RNAi induction, only ~10% of *hoka*-RNAi adult flies showed a midgut  
485 barrier defect, whereas more than 45% of flies with RNAi for other sSJ-proteins  
486 exhibited the barrier defect (Izumi et al., 2019). The median lifespan of *hoka*-RNAi  
487 adult flies (13704R-1: 30 days, *hoka*IR-L: 22 days) was much longer than in flies with  
488 RNAi for other sSJ-proteins (*ssk*-RNAi: 7 days, *mesh*-RNAi, 12074R-1: 7 days,  
489 *Tsp2A*-RNAi, 11415R-2; 8 days) (Izumi et al., 2019). Additionally, EC accumulation in  
490 *hoka*-RNAi flies was modest compared to flies with RNAi for other sSJ-proteins, where  
491 a large number of ECs fill the posterior midgut lumen 5 days after RNAi induction  
492 (Izumi et al., 2019). These modest defects in the *hoka*-RNAi midgut may reflect an  
493 insufficient reduction of Hoka expression. However, given that other sSJ-proteins are  
494 still present at the lateral membrane in the *hoka*-mutant larval and *hoka*-RNAi adult  
495 midgut, and the septa-like structures were often observed in the bicellular contacts in  
496 the *hoka*-mutant larval midgut, sSJ function may be partly maintained in the  
497 *hoka*-deficient midgut.

498         The intestinal barrier dysfunction caused by RNAi for sSJ-proteins may permit  
499 the leakage of particular substances from the midgut lumen, which may induce  
500 particular cells to secrete cytokines and growth factors for ISC proliferation.  
501 Alternatively, sSJs or sSJ-associated proteins may be directly involved in the secretion  
502 of cytokines and growth factors through the regulation of intracellular signaling in the  
503 ECs. In the latter case, Xu et al. (2019) showed that *Tsp2A* knockdown in ISCs/EBs or

504 ECs hampers the endocytic degradation of aPKC, thereby activating the aPKC and Yki  
505 signaling pathways, leading to ISC overproliferation in the midgut. Therefore, Xu et al.  
506 proposed that sSJs are directly involved in the regulation of aPKC and the Hippo  
507 pathway-mediated intracellular signaling for ISC proliferation. We have shown that the  
508 expression of *hoka*-RNAi together with *aPKC*-RNAi or *yki*-RNAi in ECs significantly  
509 reduced ISC overproliferation caused by *hoka*-RNAi. Thus, aPKC- and Yki-mediated  
510 ISC overproliferation appears to commonly occur in sSJ-protein-deficient midguts.  
511 However, the possibility that the leakage of particular substances through the  
512 paracellular route may be involved in ISC overproliferation in the sSJ-proteins-deficient  
513 midgut cannot be excluded.

514         It has been reported that apical aPKC staining is observed in ISCs but is barely  
515 detectable in ECs (Goulas et al., 2012). We found that the expression of *hoka*-RNAi in  
516 ECs increased aPKC staining in the midgut. Additionally, in the *hoka*-RNAi midgut,  
517 apical aPKC staining was observed in ISCs and in differentiated cells including EC-like  
518 cells. Thus, apical and increased cytoplasmic aPKC may contribute to ISC  
519 overproliferation. Interestingly, EC-like cells in the *hoka*-RNAi midgut do not always  
520 localize aPKC to the apical regions. Apical aPKC staining was detected in EC-like cells  
521 mounted by other cells but was barely detectable in the lumen-facing EC-like cells.  
522 These mounted cells are thought to be newly generated cells after the induction of  
523 *hoka*-RNAi, which may not be able to exclude aPKC from the apical region in the  
524 crowded cellular environment. A recent study showed that aberrant sSJ formation  
525 caused by *Tsp2A*-depletion impairs aPKC endocytosis and increases aPKC localization  
526 in the membrane of cell borders (Xu et al., 2019). The sSJ-proteins including Hoka may  
527 also regulate endocytosis to exclude aPKC from the apical membrane of ECs.

528 aPKC is a key determinant of apical-basal polarity in various epithelia (Ohno et  
529 al., 2015). However, in the *Drosophila* adult midgut, aPKC is not required for the  
530 establishment of the epithelial cell polarity (Chen et al., 2018). Instead, its activity  
531 contributes to ISC overproliferation caused by the depletion of sSJ-proteins in the  
532 midgut. Therefore, it is intriguing that the roles of aPKC in the adult midgut are  
533 different from those in several ectoderm derived epithelia. The identification of  
534 molecules involved in aPKC-mediated ISC proliferation may provide a better  
535 understanding of the aPKC-mediated signaling pathway as well as the mechanisms  
536 underlying the increased expression and apical targeting of aPKC in the ECs deficient  
537 for sSJ-proteins. It would be of particular interest for future studies to analyze whether  
538 cell-cell junction dysfunction triggers aPKC activation to regulate stem cell  
539 proliferation in metazoan tissues other than the *Drosophila* adult midgut.

540

## 541 **Materials and methods**

### 542 **Fly stocks and genetics**

543 Fly stocks were reared on a standard cornmeal fly medium at 25°C. *w<sup>1118</sup>* flies were used  
544 as wild-type flies unless otherwise specified. The other fly stocks used were *w*,  
545 *da-GAL4/TM6B*, *Tb* (#55851; Bloomington *Drosophila* Stock Center (BDSC),  
546 Bloomington, IN), *y w*; *Myo1A-GAL4* (#112001; *Drosophila* Genetic Resource Center  
547 (DGRC), Kyoto, Japan), *tubP-GAL80<sup>ts</sup>* (#7019; BDSC), *y w*; *Pin<sup>Y1</sup>/CyO*;  
548 *UAS-mCD8-GFP* (#5130; BDSC), *w*; *10xStat92E-DGFP/TM6C Sb Tb* (#26200;  
549 BDSC), *y w*; *esg-lacZ/CyO* (#108851; DGRC), and FRT19A; *ry* (#106464; DGRC).  
550 The RNAi lines used were *hoka*-RNAi (#13704R-1, Fly Stocks of National Institute of  
551 Genetics (NIG-Fly), Mishima, Japan), *Luciferase (Luc)*-RNAi (#31603; BDSC),

552 *aPKC*-RNAi (HMS01411, #35001; BDSC), *yki*-RNAi (JF03119, #31965; BDSC). The  
553 mutant stocks used were Df(3L)ssk (Yanagihashi et al., 2012), *mesh*<sup>04955</sup> (#18826;  
554 BDSC) (Izumi et al., 2012), *Tsp2A*<sup>1-2</sup> (Izumi et al., 2016). For the phenotype rescue  
555 experiment, pUAST vectors (Brand and Perrimon, 1993) containing *hoka-GFP* were  
556 constructed and a fly strain carrying this construct was established. The stocks used for  
557 the generation of *hoka*-mutants were *y*<sup>2</sup> *cho*<sup>2</sup> *v*<sup>1</sup> (TBX-0004), *y*<sup>1</sup> *v*<sup>1</sup>  
558 P{*nos-phiC31/int.NLS*}X; attP40 (II) (TBX-0002; NIG-Fly), *y*<sup>2</sup> *cho*<sup>2</sup> *v*<sup>1</sup>; Sco/CyO  
559 (TBX-0007; NIG-Fly), *y*<sup>2</sup> *cho*<sup>2</sup> *v*<sup>1</sup> P{*nosP-Cas9, y*<sup>+</sup>, *v*<sup>+</sup>}1A/FM7c, *KrGAL4 UAS-GFP*  
560 (CAS0002; NIG-Fly), and *y*<sup>2</sup> *cho*<sup>2</sup> *v*<sup>1</sup>; *PrDr/TM6C, Sb Tb* (TBX-0010; NIG-Fly).

561

## 562 **Antibodies**

563 The following antibodies were used: rabbit-anti-Hoka (29-1; 1:2000, 29-2; 1:2000),  
564 rabbit anti-Mesh (955-1; 1:1000), rabbit anti-Mesh (995-1; 1:1000), rat anti-Mesh  
565 (8002; 1:500) (Izumi et al., 2012), rabbit anti-Ssk (6981-1; 1:1000) (Yanagihashi et al.,  
566 2012), rabbit anti-Tsp2A (302AP, 1:200) (Izumi et al., 2016), mouse anti-Dlg (4F3,  
567 Developmental Studies Hybridoma Bank (DSHB); 1:50), mouse anti-Delta (C594.9B;  
568 DSHB; 1:20), rabbit anti-PH3 (06-570; Millipore, Darmstadt, Germany; 1:1000), rabbit  
569 anti-dpERK (4370; Cell Signaling, Danvers, MA; 1:500), rabbit  
570 anti-phospho-Ezrin/Radixin/Moesin (pERM) (3726; Cell Signaling, 1:200), rat  
571 anti-GFP (GF090R; Nakalai Tesque; 1:1000), rabbit anti-GFP (598; MBL, Nagoya,  
572 Japan; 1:1000), rabbit anti-aPKC (sc-216; Santa Cruz, Dallas, TX; 1:500). Alexa Fluor  
573 488-conjugated (A21206; Invitrogen), and Cy3- and Cy5-conjugated (712-165-153 and  
574 715-175-151, Jackson ImmunoResearch Laboratories, West Grove, PA, USA)  
575 secondary antibodies were used at 1:400. Actin was stained with Alexa Fluor 568



576 phalloidin (A12380; Thermo Fisher; 1:1000) or Alexa Fluor 647 phalloidin (A22287;  
577 Thermo Fisher; 1:1000). Nuclei were stained with propidium iodide (Nakalai Tesque;  
578 0.1 mg ml<sup>-1</sup>).

579

#### 580 **Deficiency screen**

581 Embryos of deficiency lines were obtained from the *Drosophila* Stock Center and the  
582 *Drosophila* Genetic Resource Center (Kyoto, Japan). The deficiency screen was  
583 performed as described previously (Izumi et al., 2016).

584

#### 585 **cDNA cloning and expression vector construction**

586 The ORF of *hoka*, including the initiation codon, was amplified by PCR with the  
587 forward primer harboring an EcoRI site  
588 (5'-cggaattcACGAAAACGACGGAAATGAAGTTGGCT-3') and the reverse primer  
589 having a BglII site (5'-gaagatctGTGACAATAGCGGTGGCATGCG -3'), and the EcoRI  
590 and BglII sites containing *Drosophila* embryonic cDNA was cloned into the EcoRI and  
591 BglII sites of the pUAST vector (Brand and Perrimon, 1993). To generate an expression  
592 vector for the C-terminal EGFP-tagged Hoka, EGFP cDNA with 3' and 5' XhoI sites  
593 was cloned into the XhoI site of pUAST-*hoka*. To generate RNAi lines (*hoka*IR-L and  
594 *hoka*IR-S), a DNA fragment containing 1 to 682 (*hoka*IR-L) or 160 to 682 (*hoka*IR-S)  
595 of the *hoka* ORF was amplified by PCR with the forward primer harboring an EcoRI  
596 site (*hoka*IR-L; 5'-cggaattcATGAAGTTGGCTAAGAAGTGC-3', *hoka*IR-S;  
597 5'-cggaattcATCGTTTGTGTAGCGGTAGGT-3') or a XhoI site (*hoka*IR-L;  
598 5'-ccgctcgagATGAAGTTGGCTAAGAAGTG-3', *hoka*IR-S; 5'-ccgctcgag  
599 ATCGTTTGTGTAGCGGTAGGT-3'), and the reverse primer having a BglII site

600 (5'-gaagatctTCAGACAATAGCGGTGGCATG-3'). The two types of DNA fragments  
601 were inserted into pUAST as a head-to-head dimer and transformed into SURE2  
602 competent cells (200152; Agilent Technologies, Santa Clara, CA, USA). Transgenic  
603 flies were generated by standard P-element transformation procedures.

604

#### 605 **Generation of *Tsp2A* mutants**

606 Generation of *hoka* mutants using the CRISPR/Cas9 system was performed according  
607 to the method described by Kondo and Ueda (Kondo and Ueda, 2013). To construct a  
608 guide RNA (gRNA) expression vector for *hoka*, two complementary 24 bp  
609 oligonucleotides of the target sequence with 4 bp overhangs on both ends  
610 (5'-cttcGGCCTGCTGCCTGCAAGAAT-3' and  
611 5'-aaacATTCTTGCAGGCAGCAGGCC-3') were annealed to generate a  
612 double-stranded DNA fragment which was cloned into BbsI-digested pBFv-U6.2  
613 (NIG-Fly) (pBFv-U6.2-*hoka*CR1). pBFv-U6.2-*hoka*CR1 was injected into the  $y^l v^l$   
614 *nos-phiC31*; *attP40* host (Bischof et al., 2007). Surviving  $G_0$  males were individually  
615 crossed to  $y^2 cho^2 v^l$  virgins. A single male transformant from each cross was mated to  
616  $y^2 cho^2 v^l$ ; *Sco*/*CyO* virgins. Offspring in which the transgene was balanced were  
617 collected to establish a stock. Males carrying a U6.2-*hoka*CR1 transgene were crossed  
618 to *nos-Cas9* females ( $y^2 cho^2 v^l$  P {*nosP-Cas9*,  $y^+$ ,  $v^+$ }1A) to obtain founder flies that  
619 have both the U6.2-*hoka*CR1 and the *nos-Cas9* transgenes. Male founders were crossed  
620 to  $y^2 cho^2 v^l$ ; *PrDr*/TM6C, *Sb Tb* female flies. Each male possessing  $y^2 cho^2 v^l/Y$ ; +/  
621 TM6C, *Sb Tb* genotype was crossed to  $y^2 cho^2 v^l$ ; *PrDr*/TM6C, *Sb Tb* female flies and  
622 the offspring possessing the  $y^2 cho^2 v^l$ ; +/ TM6C, *Sb Tb* genotype were collected to  
623 establish the lines. The embryos of the lethal lines were immunostained for Hoka.

624 Genomic DNA of the *hoka*-negative lines was extracted and analyzed for mutations in  
625 the *hoka* gene locus.

626

#### 627 **Production of polyclonal antibodies against Hoka**

628 The amino acids 77-136 encoding the cytoplasmic region of the Hoka protein were  
629 cloned into pGEX-6P (GE Healthcare) to produce a GST (Glutathione S-transferase)  
630 fusion protein. The proteins were expressed in *Escherichia coli* (DH5 $\alpha$ ). Polyclonal  
631 antibodies were generated in rabbits (29-1 and 29-2 by Kiwa Laboratory Animals  
632 (Wakayama, Japan)).

633

#### 634 **Immunostaining**

635 Embryos were fixed with 3.7% formaldehyde in PBS for 20 min. Adult flies and larvae  
636 were dissected in Hanks' Balanced Salt Solution and the midgut was fixed with 4%  
637 paraformaldehyde in PBS/0.2% Tween-20 for 30 min. The fixed specimens were  
638 washed thrice with PBS/0.4% Triton X-100 and were blocked with 5% skim milk in  
639 PBS/0.2% Tween-20. Thereafter, the samples were incubated with primary antibodies at  
640 4°C overnight, washed thrice with PBS/0.2% Tween-20, and incubated with secondary  
641 antibodies for 3 h. After another three washes, the samples were mounted in  
642 Fluoro-KEEPER antifade reagent (12593-64; Nakalai Tesque, Kyoto, Japan). Images  
643 were acquired with a confocal microscope (Model TCS SPE; Leica Microsystems,  
644 Wetzlar, Germany) using its accompanying software and the HC PLAN APOchromat  
645 20 $\times$  NA 0.7 and HCX PL objective lenses (Leica Microsystems). Images were  
646 processed with Adobe Photoshop® software (Adobe Systems Inc., San Jose, CA).

647

648 **Electron microscopy**

649 First-instar larvae of wild-type or *hoka*<sup>x211</sup>-mutants were dissected and fixed overnight  
650 at 4°C with a mixture of 2.5% glutaraldehyde and 2% paraformaldehyde in 0.1 M  
651 cacodylate buffer (pH 7.4). The specimens including the midguts were prepared as  
652 described previously (Izumi et al., 2012). Ultrathin sections (50–100 nm) were stained  
653 doubly with 4% hafnium (IV) chloride and lead citrate and observed with a JEM-1010  
654 electron microscope (JEOL, Tokyo, Japan) equipped with a Veleta TEM CCD Camera  
655 (Olympus, Tokyo, Japan) at an accelerating voltage of 80 kV.

656

657 **Co-immunoprecipitation and western blotting**

658 Fly wild-type embryos and embryos expressing EGFP-Tsp2A or GFP  
659 (*da-Gal4>UAS-EGFP-Tsp2A* or *UAS-GFP*) were mixed with a 5-fold volume of lysis  
660 buffer (30 mM Tris-HCl pH 7.5, 150 mM NaCl, 1% Brij97 (P6136, Sigma-Aldrich, St.  
661 Louis, MO, USA)) and protease inhibitor cocktail (25955-11, Nakarai Tesque, Kyoto,  
662 Japan) and homogenized using a pestle for 1.5 ml microfuge tubes. The method for  
663 immunoprecipitation was essentially the same as described previously (Izumi et al.,  
664 2016). Rabbit anti-Hoka (29-1, 29-2), rabbit anti-Mesh (995-1), rabbit anti-Ssk (6981-1),  
665 and rabbit anti-GFP (598, MBL, Nagoya, Japan) antibodies were used for  
666 immunoprecipitation. Immunocomplexes and extracts of the first-instar larva were  
667 separated on SDS-polyacrylamide gels, transferred to polyvinylidene difluoride  
668 membranes and western blot analyses were performed using rabbit anti-Hoka (29-1;  
669 1:2000, 29-2; 1:2000), rabbit anti-Mesh (995-1; 1:1000), rabbit anti-Ssk (6981-1;  
670 1:1000), rabbit anti-GFP (598; 1:1000, MBL, Nagoya, Japan), and mouse anti- $\alpha$ -tubulin  
671 (DM-1A; 1:1000, Sigma-Aldrich) antibodies. The molecular weights of protein bands

672 were estimated using the Precision Plus Protein<sup>TM</sup> Dual Color Standards (#161-0374;  
673 BIO-RAD, Hercules, CA).

674

#### 675 **Conditional expression of UAS transgenes (TARGET system)**

676 Flies were crossed and grown at 18°C until eclosion. Adult female flies were collected  
677 2–5 days after eclosion and transferred to 29°C for the inactivation of Gal80.

678

#### 679 **Barrier integrity (Smurf) assay**

680 Flies at 2–5 days of age were placed in empty vials containing a piece of paper soaked  
681 in 2.5% (wt/vol) Blue Dye No. 1 (Tokyo Chemical Industry, Tokyo, Japan)/5% sucrose  
682 solution at 50–60 flies/vial. After 2 days at 18°C, the flies were placed in new vials  
683 containing paper soaked in BlueDye/sucrose and transferred to 29°C. Loss of midgut  
684 barrier function was determined when the dye was observed outside the gut (Rera et al.,  
685 2011) (Rera et al., 2012). Flies were transferred to new vials every 2 days.

686

#### 687 **Quantification of aPKC intensity**

688 To measure the fluorescence intensity of aPKC, a z-projection was created from the R5  
689 region of the posterior midgut. The projection included stacks of the EC layer of the  
690 midgut. The mean gray value of the green channel was collected from three random  
691 (100 µm x 100 µm) fields per midgut using the ImageJ software 1.52k (U. S. National  
692 Institutes of Health, Bethesda, MD, USA) and we subtracted the background values  
693 measured from the outside area surrounding the midgut.

694

#### 695 **Statistical analyses**

696 Statistical significance was evaluated using the Mann–Whitney *U*-test, Student’s *t*-test,  
697 one-way ANOVA/Tukey’s multiple comparisons test (KaleidaGraph software; Synergy  
698 Software, Reading, PA), and the Fisher’s exact test. Values of  $p < 0.05$  were considered  
699 significant.

700

#### 701 **Acknowledgments**

702 We are grateful to all members of the Furuse laboratory for helpful discussions. We  
703 thank the Bloomington *Drosophila* Stock Center, *Drosophila* Genetic Resource Center  
704 at Kyoto Institute of Technology, and Fly Stocks of National Institute of Genetics  
705 (NIG-Fly) for fly stocks. We would like to thank Editage ([www.editage.com](http://www.editage.com)) for their  
706 assistance with English language editing.

707

#### 708 **Competing interests**

709 No competing interests declared.

710

#### 711 **Author contributions**

712 Y.I. designed the research; Y.I. and K.F. performed the experiments; Y.I. analyzed the  
713 data; Y.I. and M.F. wrote the paper.

714

#### 715 **Funding**

716 This work was supported by a Grant-in-Aid for Scientific Research (C) (15K07048,  
717 19K06650) to YI from the Japan Society for the Promotion of Science.

718

#### 719 **References**

720

- 721 **Banerjee, S., Sousa, A. D. and Bhat, M. A.** (2006). Organization and function of  
722 septate junctions: an evolutionary perspective. *Cell Biochem Biophys*, **46**, 65-77.
- 723 **Beebe, K., Lee, W. C. and Micchelli, C. A.** (2010). JAK/STAT signaling coordinates  
724 stem cell proliferation and multilineage differentiation in the *Drosophila*  
725 intestinal stem cell lineage. *Dev Biol*, **338**, 28-37.
- 726 **Beyenbach, K. W., Schone, F., Breitsprecher, L. F., Tiburcy, F., Furuse, M., Izumi,**  
727 **Y., Meyer, H., Jonusaite, S., Rodan, A. R. and Paululat, A.** (2020). The  
728 septate junction protein Tetraspanin 2A is critical to the structure and function of  
729 Malpighian tubules in *Drosophila melanogaster*. *Am J Physiol Cell Physiol*, **318**,  
730 C1107-C1122.
- 731 **Bischof, J., Maeda, R. K., Hediger, M., Karch, F. and Basler, K.** (2007). An  
732 optimized transgenesis system for *Drosophila* using germ-line-specific phiC31  
733 integrases. *Proc Natl Acad Sci U S A*, **104**, 3312-3317.
- 734 **Biteau, B. and Jasper, H.** (2011). EGF signaling regulates the proliferation of intestinal  
735 stem cells in *Drosophila*. *Development*, **138**, 1045-1055.
- 736 **Brand, A. H. and Perrimon, N.** (1993). Targeted gene expression as a means of  
737 altering cell fates and generating dominant phenotypes. *Development*, **118**,  
738 401-415.
- 739 **Buchon, N., Broderick, N. A., Kuraishi, T. and Lemaitre, B.** (2010). *Drosophila*  
740 EGFR pathway coordinates stem cell proliferation and gut remodeling following  
741 infection. *BMC Biol*, **8**, 152.
- 742 **Chen, H. J., Li, Q., Nirala, N. K. and Ip, Y. T.** (2020). The Snakeskin-Mesh Complex  
743 of Smooth Septate Junction Restricts Yorkie to Regulate Intestinal Homeostasis  
744 in *Drosophila*. *Stem Cell Reports*, **14**, 828-844.
- 745 **Chen, J., Sayadian, A. C., Lowe, N., Lovegrove, H. E. and St Johnston, D.** (2018).  
746 An alternative mode of epithelial polarity in the *Drosophila* midgut. *PLoS Biol*,  
747 **16**, e3000041.
- 748 **Ohno, S., Goulas, S. and Hirose, T.** (2015) Cell Polarity 1 : The PAR3-aPKC-PAR6  
749 Complex. (ed. K. Ebnet), pp. 3-23. Switzerland: Springer International  
750 Publishing.
- 751 **Furuse, M. and Izumi, Y.** (2017). Molecular dissection of smooth septate junctions:  
752 understanding their roles in arthropod physiology. *Ann N Y Acad Sci*, **1397**,  
753 17-24.
- 754 **Furuse, M. and Tsukita, S.** (2006). Claudins in occluding junctions of humans and  
755 flies. *Trends Cell Biol*, **16**, 181-188.
- 756 **Gabay, L., Seger, R. and Shilo, B. Z.** (1997). MAP kinase in situ activation atlas

- 757 during *Drosophila* embryogenesis. *Development*, **124**, 3535-3541.
- 758 **Goulas, S., Conder, R. and Knoblich, J. A.** (2012). The Par complex and integrins  
759 direct asymmetric cell division in adult intestinal stem cells. *Cell Stem Cell*, **11**,  
760 529-540.
- 761 **Green, C. R. and Bergquist, P. R.** (1982). Phylogenetic-Relationships within the  
762 Invertebrata in Relation to the Structure of Septate Junctions and the  
763 Development of Occluding Junctional Types. *Journal of Cell Science*, **53**,  
764 279-305.
- 765 **Guo, Z. and Ohlstein, B.** (2015). Stem cell regulation. Bidirectional Notch signaling  
766 regulates *Drosophila* intestinal stem cell multipotency. *Science*, **350**.
- 767 **Izumi, Y., Furuse, K. and Furuse, M.** (2019). Septate junctions regulate gut  
768 homeostasis through regulation of stem cell proliferation and enterocyte  
769 behavior in *Drosophila*. *J Cell Sci*, **132**.
- 770 **Izumi, Y. and Furuse, M.** (2014). Molecular organization and function of invertebrate  
771 occluding junctions. *Semin Cell Dev Biol*, **36**, 186-193.
- 772 **Izumi, Y., Motoishi, M., Furuse, K. and Furuse, M.** (2016). A tetraspanin regulates  
773 septate junction formation in *Drosophila* midgut. *J Cell Sci*, **129**, 1155-1164.
- 774 **Izumi, Y., Yanagihashi, Y. and Furuse, M.** (2012). A novel protein complex,  
775 Mesh-Ssk, is required for septate junction formation in the *Drosophila* midgut. *J*  
776 *Cell Sci*, **125**, 4923-4933.
- 777 **Jiang, H., Grenley, M. O., Bravo, M. J., Blumhagen, R. Z. and Edgar, B. A.** (2011).  
778 EGFR/Ras/MAPK signaling mediates adult midgut epithelial homeostasis and  
779 regeneration in *Drosophila*. *Cell Stem Cell*, **8**, 84-95.
- 780 **Jiang, H., Patel, P. H., Kohlmaier, A., Grenley, M. O., McEwen, D. G. and Edgar, B.**  
781 **A.** (2009). Cytokine/Jak/Stat signaling mediates regeneration and homeostasis in  
782 the *Drosophila* midgut. *Cell*, **137**, 1343-1355.
- 783 **Jiang, H., Tian, A. and Jiang, J.** (2016). Intestinal stem cell response to injury: lessons  
784 from *Drosophila*. *Cell Mol Life Sci*, **73**, 3337-3349.
- 785 **Jonusaite, S., Beyenbach, K. W., Meyer, H., Paululat, A., Izumi, Y., Furuse, M. and**  
786 **Rodan, A. R.** (2020). The septate junction protein Mesh is required for  
787 epithelial morphogenesis, ion transport, and paracellular permeability in the  
788 *Drosophila* Malpighian tubule. *Am J Physiol Cell Physiol*, **318**, C675-C694.
- 789 **Jonusaite, S., Donini, A. and Kelly, S. P.** (2016). Occluding junctions of invertebrate  
790 epithelia. *J Comp Physiol B*, **186**, 17-43.
- 791 **Karpowicz, P., Perez, J. and Perrimon, N.** (2010). The Hippo tumor suppressor  
792 pathway regulates intestinal stem cell regeneration. *Development*, **137**,



- 793 4135-4145.
- 794 **Kondo, S. and Ueda, R.** (2013). Highly improved gene targeting by germline-specific  
795 Cas9 expression in *Drosophila*. *Genetics*, **195**, 715-721.
- 796 **Lane, N. J., Dallai, R., Martinucci, G. and Burighel, P.** (1994). Electron microscopic  
797 structure and evolution of epithelial junctions. *Molecular Mechanisms of*  
798 *Epithelial Cell Junctions: From Development to Disease* (ed. S. Citi), 23-43.
- 799 **Lane, N. J. and Swales, L. S.** (1982). Stages in the assembly of pleated and smooth  
800 septate junctions in developing insect embryos. *J Cell Sci*, **56**, 245-262.
- 801 **Mcguire, S. E., Mao, Z. and Davis, R. L.** (2004). Spatiotemporal gene expression  
802 targeting with the TARGET and gene-switch systems in *Drosophila*. *Sci STKE*,  
803 **2004**, pl6.
- 804 **Micchelli, C. A. and Perrimon, N.** (2006). Evidence that stem cells reside in the adult  
805 *Drosophila* midgut epithelium. *Nature*, **439**, 475-479.
- 806 **Ohlstein, B. and Spradling, A.** (2006). The adult *Drosophila* posterior midgut is  
807 maintained by pluripotent stem cells. *Nature*, **439**, 470-474.
- 808 **Osman, D., Buchon, N., Chakrabarti, S., Huang, Y. T., Su, W. C., Poidevin, M., Tsai,**  
809 **Y. C. and Lemaitre, B.** (2012). Autocrine and paracrine unpaired signaling  
810 regulate intestinal stem cell maintenance and division. *J Cell Sci*, **125**,  
811 5944-5949.
- 812 **Ren, F., Wang, B., Yue, T., Yun, E. Y., Ip, Y. T. and Jiang, J.** (2010). Hippo signaling  
813 regulates *Drosophila* intestine stem cell proliferation through multiple pathways.  
814 *Proc Natl Acad Sci U S A*, **107**, 21064-21069.
- 815 **Rera, M., Bahadorani, S., Cho, J., Koehler, C. L., Ulgherait, M., Hur, J. H., Ansari,**  
816 **W. S., Lo, T., Jr., Jones, D. L. and Walker, D. W.** (2011). Modulation of  
817 longevity and tissue homeostasis by the *Drosophila* PGC-1 homolog. *Cell Metab*,  
818 **14**, 623-634.
- 819 **Rera, M., Clark, R. I. and Walker, D. W.** (2012). Intestinal barrier dysfunction links  
820 metabolic and inflammatory markers of aging to death in *Drosophila*. *Proc Natl*  
821 *Acad Sci U S A*, **109**, 21528-21533.
- 822 **Resnik-Docampo, M., Koehler, C. L., Clark, R. I., Schinaman, J. M., Sauer, V.,**  
823 **Wong, D. M., Lewis, S., D'alterio, C., Walker, D. W. and Jones, D. L.** (2017).  
824 Tricellular junctions regulate intestinal stem cell behaviour to maintain  
825 homeostasis. *Nat Cell Biol*, **19**, 52-59.
- 826 **Rouka, E., Gourgoulianni, N., Lupold, S., Hatzoglou, C., Gourgouliannis, K.,**  
827 **Blanckenhorn, W. U. and Zarogiannis, S. G.** (2020). The *Drosophila* septate  
828 junctions beyond barrier function: Review of the literature, prediction of human

- 829 orthologs of the SJ-related proteins and identification of protein domain families.  
830 *Acta Physiol (Oxf)*, e13527.
- 831 **Salazar, A. M., Resnik-Docampo, M., Ulgherait, M., Clark, R. I., Shirasu-Hiza, M.,**  
832 **Jones, D. L. and Walker, D. W.** (2018). Intestinal Snakeskin Limits Microbial  
833 Dysbiosis during Aging and Promotes Longevity. *iScience*, **9**, 229-243.
- 834 **Shaw, R. L., Kohlmaier, A., Polesello, C., Veelken, C., Edgar, B. A. and Tapon, N.**  
835 (2010). The Hippo pathway regulates intestinal stem cell proliferation during  
836 *Drosophila* adult midgut regeneration. *Development*, **137**, 4147-4158.
- 837 **Tepass, U. and Hartenstein, V.** (1994). The development of cellular junctions in the  
838 *Drosophila* embryo. *Dev Biol*, **161**, 563-596.
- 839 **Tepass, U., Tanentzapf, G., Ward, R. and Fehon, R.** (2001). Epithelial cell polarity  
840 and cell junctions in *Drosophila*. *Annu Rev Genet*, **35**, 747-784.
- 841 **Wu, V. M. and Beitel, G. J.** (2004). A junctional problem of apical proportions:  
842 epithelial tube-size control by septate junctions in the *Drosophila* tracheal  
843 system. *Curr Opin Cell Biol*, **16**, 493-499.
- 844 **Xu, C., Tang, H. W., Hung, R. J., Hu, Y., Ni, X., Housden, B. E. and Perrimon, N.**  
845 (2019). The Septate Junction Protein Tsp2A Restricts Intestinal Stem Cell  
846 Activity via Endocytic Regulation of aPKC and Hippo Signaling. *Cell Rep*, **26**,  
847 670-688 e676.
- 848 **Yanagihashi, Y., Usui, T., Izumi, Y., Yonemura, S., Sumida, M., Tsukita, S., Uemura,**  
849 **T. and Furuse, M.** (2012). Snakeskin, a membrane protein associated with  
850 smooth septate junctions, is required for intestinal barrier function in *Drosophila*.  
851 *J Cell Sci*, **125**, 1980-1990.
- 852 **Zheng, Y. and Pan, D.** (2019). The Hippo Signaling Pathway in Development and  
853 Disease. *Dev Cell*, **50**, 264-282.
- 854 **Zhou, F., Rasmussen, A., Lee, S. and Agaisse, H.** (2013). The UPD3 cytokine couples  
855 environmental challenge and intestinal stem cell division through modulation of  
856 JAK/STAT signaling in the stem cell microenvironment. *Dev Biol*, **373**, 383-393.

857

## 858 **Figure legends**

### 859 **Figure 1. Identification of *hoka* as an sSJ-related gene via a deficiency screen**

860 (A, B) Immunofluorescence staining of embryonic stage 16 wild-type (A) and  
861 Df(3L)ED210 (B) OELPs using an anti-Mesh antibody. Basal membranes are delineated

862 by dots (A). Scale bar: 20  $\mu$ m.

863 (C) Physical map of the *Drosophila* 3rd-chromosome containing the *hoka* gene.

864 Full-length genes of *hoka/CG13704* are contained in this region. The *hoka* DNA

865 sequence used for the construction of *hoka*-RNAi (13704R-1, *hoka*IR-L, and *hoka*IR-S)

866 is indicated by blue lines. Gray bar: untranslated regions of the *hoka* transcript/*hoka*-RA.

867 Black bar: coding sequences of the *hoka* transcript/*hoka*-RA.

868 (D) Genomic sequences of *hoka*-mutations induced by the CRISPR/Cas9 method. The

869 nucleotide sequence of wild-type *hoka* from the start codon is shown at the top. The

870 guide RNA target sequence is underlined and the PAM sequence is shown in red.

871 Deleted nucleotides are shown as dashes. Inserted nucleotides are shown in lowercase

872 letters.

873 (E) Amino acid sequence of Hoka. The Hoka polypeptide contains a signal peptide (SP:

874 blue), a transmembrane region (TM: red), and three Tyr-Thr-Pro-Ala (YTPA,

875 highlighted by gray) repeat motifs in the threonine-rich (green) cytoplasmic region.

876 (F–F'') Immunofluorescence staining of the Hoka-GFP-expressing stage 16 OELP

877 (*da*-GAL4; UAS-*hoka*-GFP) using anti-GFP (F, F'') and anti-Mesh (F', F'') antibodies.

878 Hoka-GFP colocalizes with Mesh at sSJs.

879 (G–I'') Immunofluorescence staining of *hoka*<sup>x211</sup>-mutant (*hoka*<sup>x211</sup>, *da*-GAL4, G–G'';

880 *hoka*<sup>x211</sup>, UAS-*hoka*-GFP, H–H'') and Hoka-GFP-expressing *hoka*<sup>x211</sup>-mutant (*hoka*<sup>x211</sup>,

881 *da*-GAL4, UAS-*hoka*-GFP, I–I'') stage 16 OELPs using anti-GFP (G, G'', H, H'', I, I'')

882 and anti-Mesh (G', G'', H', H'', I', I'') antibodies. Basal membranes are delineated by

883 dots. Scale bar (F–I''): 5  $\mu$ m.

884

885 **Figure 2. Hoka localizes to sSJs.**

886 (A, A') Immunofluorescence staining of a stage 16 wild-type embryo using anti-Hoka  
887 (A, A') and anti-Mesh (A') antibodies. pv, proventriculus; mg, midgut. The outline of  
888 the embryo is delineated by dots. Scale bar: 50  $\mu$ m.

889 (B–D) Immunofluorescence staining of the wild-type first-instar larval anterior midgut  
890 (B), posterior midgut (C), and adult midgut (D) using an anti-Hoka antibody. Hoka is  
891 expressed in the first-instar larval midgut, the OELP, and the Malpighian tubules (B, C).  
892 Hoka signals were not detected in the foregut (B) or hindgut (C). fg, foregut; pv,  
893 proventriculus; gc, gastric caeca; mg, midgut; mp, Malpighian tubules; hg, hindgut.  
894 Scale bar: 50  $\mu$ m (B, C), 20  $\mu$ m (D).

895 (E–F'') Immunofluorescence staining of the wild-type first-instar larval (E–E'') and  
896 adult (F–F'') midgut using anti-Hoka (green in E, F) and anti-Mesh (red in E', F')  
897 antibodies. Basal membranes are delineated by dots. Scale bar: 5  $\mu$ m (E), 20  $\mu$ m (F).

898 (G–J'') The first-instar larval midgut of wild-type, Df(3L)ssk, *mesh*<sup>04955</sup>-mutant, and  
899 *Tsp2A*<sup>1-2</sup>-mutant stained with anti-Hoka (green in G–J) and anti-Dlg (red in G'–J')  
900 antibodies. Scale bar: 5  $\mu$ m.

901

902 **Figure 3. Hoka is required for the localization of sSJ-proteins.**

903 (A–B'') The first-instar larval OELPs of wild-type (A–A'') and *hoka*<sup>x211</sup>-mutants (B–B'')  
904 stained with anti-Hoka (green in A, A'', B, B'') and anti-Dlg (red in A', A'', B', B'')  
905 antibodies.

906 (C–H) The first-instar larval OELPs of wild-type (C, D, E) and *hoka*<sup>x211</sup>-mutant (F, G,  
907 H) stained with anti-Ssk (C, F), anti-Mesh (D, G) and anti-Tsp2A (E, H) antibodies.

908 (I–J'') The first-instar larval midgut of wild-type (I–I'') and *hoka*<sup>x211</sup>-mutant (J–J'')  
909 stained with anti-Hoka (green in I, I'', J, J'') and anti-Dlg (red in I', I'', J', J'') antibodies.

910 (K–S) The first-instar larval midgut of wild-type (K, L, M) and *hoka*<sup>x211</sup>-mutant (N, O, P,  
911 Q, R, S) stained with anti-Ssk (K, N, Q), anti-Mesh (L, O, R) and anti-Tsp2A (M, P, S)  
912 antibodies. Basal membranes are delineated by dots. Scale bar (A–S): 5  $\mu$ m.

913

914 **Figure 4. Hoka is required for the correct organization of sSJ structure.**

915 (A–H) Transmission electron microscopy of the first-instar larval midgut in wild-type  
916 (A, B) and *hoka*-mutants (C–H). In the wild-type midgut, typical sSJs are observed at  
917 bicellular contacts (A, B). In the *hoka*-mutant midgut, proper sSJ structures are barely  
918 detectable at the apicolateral region of bicellular contact (C–H), although the ladder-like  
919 structures are occasionally visible (C–E, brackets). Large gaps are often formed  
920 between the apicolateral regions of adjacent cells (F–H, asterisks). Scale bar: 500 nm.

921

922 **Figure 5. Hoka forms a complex with Ssk, Mesh, and Tsp2A.**

923 (A, B) Hoka co-immunoprecipitates with Ssk and Mesh. The embryonic extracts (Input)  
924 were subjected to immunoprecipitation (IP) with anti-Hoka (A), anti-Mesh (B), and  
925 anti-Ssk (B) antibodies. The immunocomplexes were separated on a 15%  
926 SDS-polyacrylamide gel, and western blot analyses were performed using anti-Hoka  
927 (upper panel), anti-Mesh (middle panel), and anti-Ssk (lower panel) antibodies. Hoka  
928 was immunoprecipitated with anti-Hoka antibodies, but not with the pre-immune serum  
929 (A, upper panel). The immunoprecipitates of Hoka contained Mesh (A, middle panel)  
930 and Ssk (A, lower panel). Mesh was immunoprecipitated with an anti-Mesh antibody,  
931 but not with a control IgG (B, middle panel). The immunoprecipitates of Mesh  
932 contained Hoka (B, upper panel) and Ssk (B, lower panel). Ssk was immunoprecipitated  
933 with an anti-Ssk antibody, but not with a control IgG (B, middle panel). The

934 immunoprecipitates of Ssk contained Hoka (B, upper panel) and Mesh (B, lower panel).  
935 (C) Hoka co-immunoprecipitates with EGFP-Tsp2A. Extracts of embryos expressing  
936 *da-GAL4/EGFP* or *da-GAL4/EGFP-Tsp2A* (Input) were immunoprecipitated (IP) with  
937 an anti-GFP antibody. The immunocomplexes were separated on a 15%  
938 SDS-polyacrylamide gel, and western blot analyses were performed using anti-Hoka  
939 (upper panel) or anti-GFP (lower panel) antibodies. Immunoprecipitations of  
940 EGFP-Tsp2A (~50 kDa, arrow) with an anti-GFP antibody are shown (lower panel).  
941 EGFP was immunoprecipitated with an anti-GFP antibody from the embryos that  
942 expressed EGFP (arrow in lower panel). Hoka was co-precipitated with EGFP-Tsp2A  
943 but not with EGFP (arrow in upper panel). Hoka was not precipitated with a control IgG  
944 from embryos expressing EGFP-Tsp2A. The kDa indicated on the left-hand side of the  
945 images (A–C) refer to the marker band positions.

946

947 **Figure 6. Depletion of *hoka* from ECs in adult flies results in a shortened lifespan**  
948 **and midgut barrier dysfunction.**

949 (A) Western blot analyses of the *hoka*-RNAi adult midgut. Extracts of the adult midgut  
950 prepared from control (*Myo1A<sup>ts</sup>-Gal4/UAS-Luc-RNAi*) or *hoka*-RNAi  
951 (*Myo1A<sup>ts</sup>-Gal4/UAS-hoka-RNAi* 13704R-1 or *hokaIR-L*) flies at 10 days after  
952 induction were separated on a 15% SDS-polyacrylamide gel, and western blot analyses  
953 were performed using the anti-Hoka (29-1, upper panel) and anti- $\alpha$ -tubulin (lower  
954 panel) antibodies.

955 (B) Survival analysis of flies expressing *Myo1A<sup>ts</sup>-Gal4* with UAS-*Luc*-RNAi (control,  
956  $n=300$ ), UAS-*hoka*-RNAi 13704R-1 ( $n=300$ ), or UAS-*hoka*-RNAi *hokaIR-L*  
957 (15074R-1) ( $n=300$ ). The transgenes were expressed with GAL80<sup>ts</sup>; therefore, the flies

958 were raised at 18°C until adulthood and were then moved to 29°C. Each vial contained  
959 30 flies (15 females, 15 males). Median lifespan; *Luc*-RNAi: 37 days, *hoka*-RNAi  
960 13704R-1: 30 days, *hoka*IR-L: 22 days.

961 **(C, D)** Barrier integrity (Smurf) assays. Flies expressing *Myo1A<sup>ts</sup>*-Gal4 with  
962 UAS-*Luc*-RNAi (control), UAS-*hoka*-RNAi 13704R-1, or UAS-*hoka*-RNAi *hoka*IR-L  
963 were fed blue dye in sucrose solution. (C) A control fly and midgut barrier-defective  
964 Hoka-deficient flies with blue bodies at 8 days after transgene induction. (D) Left to  
965 right: Control ( $n=365$ ), *hoka*-RNAi 13704R-1 ( $n=379$ ), and *hoka*-RNAi *hoka*IR-L  
966 ( $n=471$ ) at 5 days after induction, control ( $n=582$ ), *hoka*-RNAi 13704R-1 ( $n=233$ ), and  
967 *hoka*-RNAi *hoka*IR-L ( $n=324$ ) at 8 days after induction. The loss of midgut barrier  
968 function was determined when the dye was observed outside the midgut. Flies with blue  
969 color throughout the body were judged midgut barrier-defective flies although the tone  
970 of the color varied depending on the affected flies. *hoka*-RNAi flies showed the loss of  
971 barrier function compared with control flies. The  $p$ -values in (D) represent significant  
972 differences in pairwise post-test comparisons indicated by the corresponding bars  
973 (Fisher's exact test).

974

975 **Figure 7. The depletion of *hoka* from ECs leads to increased ISC proliferation and**  
976 **accumulation of ECs in the adult midgut.**

977 **(A–C)** Confocal images of the adult posterior midgut expressing *Myo1A<sup>ts</sup>*-Gal4 with  
978 UAS-*Luc*-RNAi (control, A), UAS-*hoka*-RNAi 13704R-1 (B), or UAS-*hoka*-RNAi  
979 *hoka*IR-L (C) at 10 days after induction and stained for PH3 (red, arrows), and Delta  
980 (green). The images show the surface views of the midgut.

981 **(D–F)** Confocal images of the adult posterior midgut expressing *Myo1A<sup>ts</sup>*-Gal4 with

982 UAS-*Luc*-RNAi (control, D), UAS-*hoka*-RNAi 13704R-1 (E), or UAS-*hoka*-RNAi  
983 *hoka*IR-L (F) at 10 days after induction and stained for dpERK (red). The images show  
984 the surface views of the midgut. The enhancement of Ras-MAPK pathway activity in  
985 the *hoka*-RNAi midgut is shown by the increased expression of dpERK (E, F). The  
986 outline of the midgut is delineated by dots (D).

987 **(G–I)** Confocal images of the adult posterior midgut expressing  
988 *Myo1A<sup>ts</sup>*-Gal4/*10xSTAT-DGFP* with UAS-*Luc*-RNAi (control, G), UAS-*hoka*-RNAi  
989 13704R-1 (H), or UAS-*hoka*-RNAi *hoka*IR-L (I) at 10 days after induction and stained  
990 for GFP (green) and DNA (propidium iodide) (red). The enhancement of the Jak-Stat  
991 pathway activity in the *hoka*-RNAi midgut is shown by the increased expression of the  
992 *10xSTAT-DGFP* reporter (H, I). The images show the surface views of the midgut.  
993 Scale bar (A–I): 100  $\mu$ m.

994 **(J)** Quantification of PH3-positive cells. The dot-plots show the numbers of  
995 PH3-positive cells in the individual midguts. Left to right: Control ( $n=18$ ), *hoka*-RNAi  
996 13704R-1 ( $n=20$ ) and *hoka*-RNAi *hoka*IR-L ( $n=24$ ) at 5 days after induction, Control  
997 ( $n=23$ ), *hoka*-RNAi 13704R-1 ( $n=21$ ), *hoka*-RNAi *hoka*IR-L ( $n=20$ ), and *hoka*-RNAi  
998 *hoka*IR-S ( $n=17$ ) at 10 days after induction. The bars and numbers in the graph  
999 represent the mean PH3-positive cells in the fly lines. Statistical significance  
1000 ( $p<0.0001$ ) was evaluated by one-way ANOVA/Tukey's multiple comparisons tests.

1001 **(K–M)** Confocal images of the adult posterior midgut expressing  
1002 *Myo1A<sup>ts</sup>*-Gal4/UAS-*CD8-GFP* with UAS-*Luc*-RNAi (control, K), UAS-*hoka*-RNAi  
1003 13704R-1 (L), or UAS-*hoka*-RNAi *hoka*IR-L (M) at 10 days after induction and stained  
1004 for CD8-GFP (green), DNA (propidium iodide) (red), and F-actin (blue). The images  
1005 show longitudinal cross-sections through the center of the midgut. CD8-GFP driven by



1006 *MyoIA<sup>ts</sup>* was expressed in the ECs of each midgut. Scale bar: 100  $\mu$ m.  
1007 (N–P’’) Confocal images of the adult posterior midgut expressing  
1008 *MyoIA<sup>ts</sup>*-Gal4/UAS-*CD8-GFP* with UAS-*Luc*-RNAi (control, N–N’), UAS-*hoka*-RNAi  
1009 13704R-1 (O–O’), or UAS-*hoka*-RNAi *hoka*IR-L (P–P’’) at 10 days after induction and  
1010 stained for pERM (red in N, N’, O, O’, P, P’’) and Dlg (blue in N’, N’’, O’, O’’, P’, P’’).  
1011 The images show the longitudinal cross-sections through the center of the midgut.  
1012 CD8-GFP driven by *MyoIA<sup>ts</sup>* was expressed in the ECs of each midgut. Scale bar: 20  
1013  $\mu$ m.  
1014 (Q) The diameter of the posterior region of the midgut. The diameter of the midgut was  
1015 measured just anterior to the Malpighian tubules. Left to right: Control ( $n=19$ ),  
1016 *hoka*-RNAi 13704R-1 ( $n=17$ ), and *hoka*-RNAi *hoka*IR-L ( $n=15$ ) at 5 days after  
1017 induction, Control ( $n=19$ ), *hoka*-RNAi 13704R-1 ( $n=19$ ), *hoka*-RNAi *hoka*IR-L ( $n=21$ ),  
1018 and *hoka*-RNAi *hoka*IR-S ( $n=19$ ) at 10 days after induction. Error bars indicate the  
1019 SEM. Statistical significance ( $p<0.0001$ ) was evaluated using one-way  
1020 ANOVA/Tukey’s multiple comparisons tests.

1021

1022 **Figure 8. The depletion of *aPKC* and *yki* from *hoka*-RNAi ECs results in the**  
1023 **reduction of ISC overproliferation caused by *hoka*-RNAi.**

1024 (A, B) Confocal images of the adult posterior midgut expressing *MyoIA<sup>ts</sup>*-Gal4 with  
1025 UAS-*Luc*-RNAi (control, A) or UAS-*hoka*-RNAi 13704R-1 (B) at 5 days after  
1026 induction and stained for aPKC (green). The images show the surface views of the  
1027 midgut. The outline of the midgut is delineated by dots. Scale bar: 100  $\mu$ m.

1028 (C) Dot-plots showing the mean aPKC fluorescence intensity in the posterior midgut.  
1029 The bars and the numbers in the graph display the mean fluorescence intensity of the

1030 control (*Luc*-RNAi) or *hoka*-RNAi 13704R-1 midgut. The mean fluorescence intensity  
1031 was calculated from three random (100  $\mu$ m x 100  $\mu$ m) fields per midgut ( $n=10$  for each  
1032 genotype). Statistical significance ( $P<0.001$ ) was determined using the Mann-Whitney  
1033 *U* test.

1034 **(D–H’)** Confocal images of the adult posterior midgut expressing *Myo1A<sup>ts</sup>*-Gal4 with  
1035 UAS-*Luc*-RNAi (control, D–D’, G–G’), UAS-*hoka*-RNAi 13704R-1 (E–E’, H–H’), or  
1036 UAS-*hoka*-RNAi *hoka*IR-L (F–F’) at 5 days after induction and stained for aPKC  
1037 (green in D–H, D’–H’), F-actin (blue in D’–F’, D’–F’), andDlg (blue in G’, G’, H’,  
1038 H’). The arrowheads indicate the cells with apical aPKC staining and a small nucleus in  
1039 the control midgut. The arrows indicate cells with apical aPKC staining and a large  
1040 nucleus in the *hoka*-RNAi midgut. The images show the longitudinal cross-sections  
1041 through the center of the midgut.

1042 **(I–K’)** Confocal images of the adult posterior midgut expressing  
1043 *Myo1A<sup>ts</sup>*-Gal4/UAS-*CD8-GFP* with UAS-*Luc*-RNAi (control, I–I’) or  
1044 UAS-*hoka*-RNAi 13704R-1 (J–K’) at 5 days after induction and stained for aPKC (red  
1045 in I, I’, J, J’, K, K’) and Delta (blue in I’, I’, J’, J’, K’, K’). The arrowheads indicate  
1046 Delta and aPKC double-positive cells. The arrows and the yellow arrows indicate the  
1047 apical aPKC-positive and CD8-GFP-negative cells, and the apical aPKC and  
1048 CD8-GFP-double positive cells, respectively. CD8-GFP driven by *Myo1A<sup>ts</sup>* was  
1049 expressed in the ECs of each midgut. The images show the longitudinal cross-sections  
1050 through the center of the midgut. Scale bar (D–K’): 20  $\mu$ m.

1051 **(L)** Quantification of PH3-positive cells. The dot-plots show the numbers of  
1052 PH3-positive cells in the individual midguts. Left to right: Control ( $n=28$ ), *hoka*-RNAi  
1053 13704R-1 together with *Luc*-RNAi ( $n=36$ ), *hoka*-RNAi 13704R-1 together with

1054 *aPKC*-RNAi HMS01411 ( $n=34$ ), and *hoka*-RNAi 13704R-1 together with *yki*-RNAi  
1055 JF03119 ( $n=39$ ) at 5 days after induction. Bars and numbers in the graph represent the  
1056 mean PH3-positive cells in the fly lines. Statistical significance ( $p<0.0001$ ) was  
1057 evaluated by one-way ANOVA/Tukey's multiple comparisons tests.

1058

1059 **Figure S1. Multiple sequence alignment of the Hoka amino acid sequence with the**  
1060 **homologs in *Drosophila*, mosquito, and butterfly.**

1061 The MAFFT multiple sequence alignment was performed using the OMA browser  
1062 (<https://corona.omabrowser.org/oma/home/>). The amino acid sequence of *Drosophila*  
1063 *melanogaster* (DEOME) Hoka is shown at the top (red). Signal peptides and  
1064 transmembrane regions are highlighted in yellow and gray, respectively. YTPA  
1065 (Tyr-Thr-Pro-Ala) motifs are highlighted by green. Although the Hoka homolog of the  
1066 butterfly *Melitaea cinxia* (MELCN) does not possess the YTPA motif, a similar motif  
1067 (YQPA) is found in the cytoplasmic region. The number of YTPA/YQPA motif(s) is  
1068 indicated at the end of each sequence.

1069

1070 **Figure S2. Characterization of the *hoka*-mutant strains and anti-Hoka antibodies.**

1071 (A–E) The extracts from the first-instar larva prepared from wild-type and  
1072 *hoka*<sup>x211</sup>-mutants were separated on 15% (A–D) or 8% (E) SDS-polyacrylamide gels,  
1073 and western blot analyses were performed using the anti-Hoka (A, left panel, 29-1; right  
1074 panel, 29-2), anti-Ssk (B), anti-Tsp2A (C), anti- $\alpha$ -tubulin (D), and anti-Mesh (E)  
1075 antibodies. A protein band of ~21 kDa was detected by anti-Hoka antibodies in the  
1076 wild-type but not in the *hoka*<sup>x211</sup>-mutant (E; arrowheads), indicating that the ~21 kDa  
1077 band represents Hoka. The density of the main bands of Ssk (~15 kDa) and Tsp2A (~21

1078 kDa) were not significantly different in the *hoka*<sup>x211</sup>-mutant relative to the wild-type (F,  
1079 G; arrowhead). The density of the main band for Mesh was slightly increased in the  
1080 *hoka*<sup>x211</sup>-mutant compared to the wild-type (E; arrowhead). In the  
1081 higher-molecular-mass band for Mesh, which showed a double band at ~200 kDa, the  
1082 upper band (Mesh\*) was increased in the *hoka*<sup>x211</sup>-mutant compared to the wild-type (E;  
1083 white arrowhead). Western blots using the anti- $\alpha$ -tubulin antibody as the loading control  
1084 show that the same quantities of protein were loaded in the wild-type and  
1085 *hoka*<sup>x211</sup>-mutant extracts (D).

1086 (F–I'') Immunofluorescence staining of stage 16 wild-type (F–F''), *hoka*<sup>x113</sup> (G–G''),  
1087 *hoka*<sup>x127</sup> (H–H''), or *hoka*<sup>x211</sup> (I–I'') embryos using the anti-Hoka (29-1, green) and  
1088 anti-Mesh (8002, red) antibodies. The immunoreactivity of the anti-Hoka antibody  
1089 (29-1) was diminished in the *hoka*<sup>x113</sup>, *hoka*<sup>x127</sup>, or *hoka*<sup>x211</sup> embryos. The arrows  
1090 indicate OELPs. Bars: 50  $\mu$ m.

1091

1092 **Figure S3. Hoka, Ssk, Mesh, and Tsp2A distribution during sSJ formation in the**  
1093 **wild-type and *hoka*<sup>x211</sup>-mutant embryonic OELPs.**

1094 (A–R) Immunofluorescence staining of stage 14 wild-type OELPs (A–A'', G, M),  
1095 *hoka*<sup>x211</sup>-mutant OELPs (D–D'', J, P), stage 15 wild-type OELPs (B–B'' and H, N),  
1096 *hoka*<sup>x211</sup>-mutant OELPs (E–E'', K, Q), stage 16 wild-type OELPs (C–C'', I, O), and  
1097 *hoka*<sup>x211</sup>-mutant OELPs (F–F'', L, R) with the anti-Hoka (29-1 for A–F, A''–F''),  
1098 anti-Mesh (8002 for A'–F', A''–F''), anti-Ssk (6981-1 for G–L), and anti-Tsp2A (301AP  
1099 for M–R). Scale bar (A–R): 5  $\mu$ m.

1100

1101 **Figure S4. The distribution of sSJ-proteins in the *hoka*-RNAi adult midgut.**

1102 (A–I’’) Confocal images of the adult posterior midgut expressing *MyoIA<sup>ts</sup>*-Gal4 with  
1103 UAS-*Luc*-RNAi (control, A, D, G–G’’), UAS-*hoka*-RNAi 13704R-1 (B, E, H–H’’), or  
1104 UAS-*hoka*-RNAi *hoka*IR-L (C, F, I–I’’) at 10 days after induction and stained for Ssk  
1105 (6981-1 for A–C), Mesh (995-1 for D–F), Tsp2A (302 for G–I, G’’–I’’), Dlg (G’–I’, G’’–  
1106 I’’). The images show the surface views of the midgut. Scale bar (A–I’’): 10  $\mu$ m.

1107

1108 **Figure S5. The knockdown of *hoka* in progenitor cells leads to increased ISC**  
1109 **proliferation and accumulation of ECs in the adult midgut.**

1110 (A–C) Confocal images of the adult posterior midgut expressing *esg<sup>ts</sup>*-Gal4 with  
1111 UAS-*Luc*-RNAi (control, A), UAS-*hoka*-RNAi 13704R-1 (B), or UAS-*hoka*-RNAi  
1112 *hoka*IR-L (C) at 10 days after induction stained for PH3 (green, arrows) and DNA  
1113 (propidium iodide) (red). The images show the surface views of the midgut.  
1114 PH3-positive cells were increased in the *hoka*-RNAi midgut compared with the control  
1115 midgut. Scale bar: 100  $\mu$ m.

1116 (D–F) Confocal images of the adult posterior midgut expressing *esg<sup>ts</sup>*-Gal4 with  
1117 UAS-*Luc*-RNAi (control, D), UAS-*hoka*-RNAi 13704R-1 (E), or UAS-*hoka*-RNAi  
1118 *hoka*IR-L (F) at 10 days after induction and stained for DNA (propidium iodide) (red)  
1119 and F-actin (blue). The images show the longitudinal cross-sections through the center  
1120 of the midgut. Several ECs were accumulated in the *hoka*-RNAi *hoka*IR-L midgut  
1121 lumen (F). Scale bar: 100  $\mu$ m.

1122 (G) Quantification of PH3-positive cells. The dot-plots show the numbers of  
1123 PH3-positive cells in individual midguts. Left to right: Control (*Luc*-RNAi) ( $n=16$ ),  
1124 *hoka*-RNAi 13704R-1 ( $n=16$ ) and *hoka*-RNAi *hoka*IR-L ( $n=18$ ) at 10 days after  
1125 induction. The bars and numbers in the graph represent the mean PH3-positive cells in

1126 the fly lines. Statistical significance ( $p < 0.0001$ ) was evaluated by one-way  
1127 ANOVA/Tukey's multiple comparisons tests.

1128

1129 **Figure S6. *aPKC*- and *yki*-RNAi together with *hoka*-RNAi in ECs results in**  
1130 **reduced ISC overproliferation caused by *hoka*-RNAi.**

1131 **(A–H)** Confocal images of the adult posterior midgut expressing *MyoIA<sup>ts</sup>*-Gal4 with  
1132 UAS-*Luc*-RNAi (control, A, E), UAS-*hoka*-RNAi 13704R-1 together with *Luc*-RNAi  
1133 (B, F), UAS-*hoka*-RNAi 13704R-1 together with *aPKC*-RNAi HMS01411 (C, G), or  
1134 UAS-*hoka*-RNAi 13704R-1 together with *yki*-RNAi JF03119 (D, H) at 5 days after  
1135 induction and stained for PH3 (green, A–D), DNA (propidium iodide, A–H) (red), and  
1136 F-actin (E–H). The images (A–D) and (E–H) show the surface views of the midgut and  
1137 longitudinal cross-sections through the center of the midgut, respectively. Scale bar (A–  
1138 H): 100  $\mu$ m.

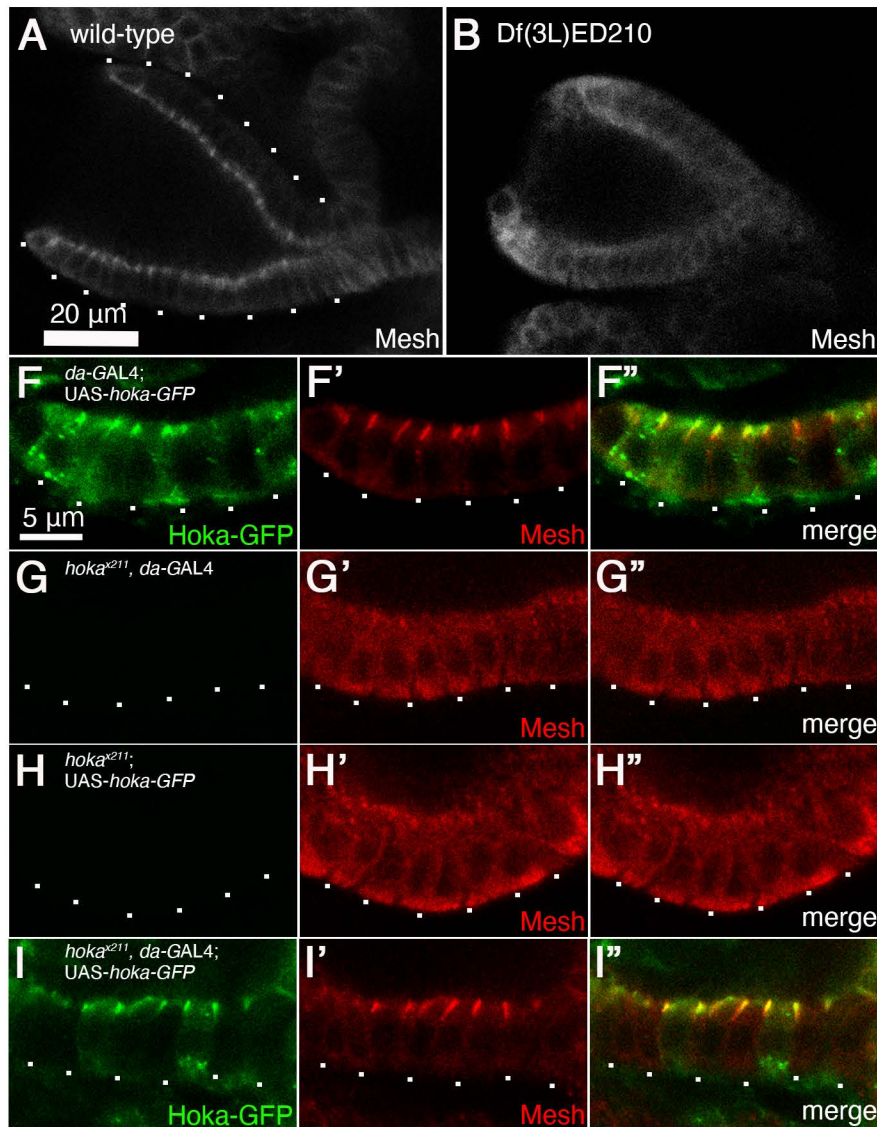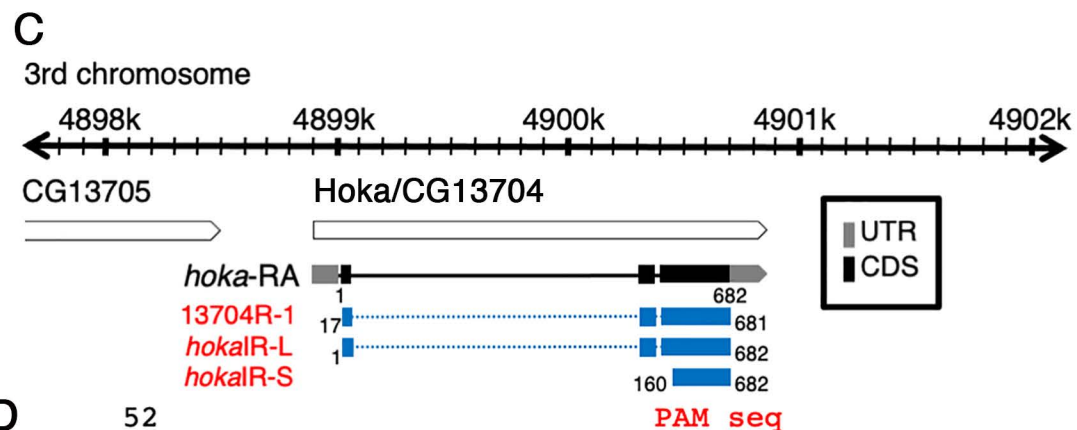

**D**

|                            |    |                                                |
|----------------------------|----|------------------------------------------------|
| <i>wild-type</i>           | 52 | TTG GCC TGC TGC CTG CAA GAA TCG GAG GCC ACG    |
| <i>hoka<sup>x113</sup></i> |    | TTG GCC TGC TGC CTG Cca ... .CG GAG GCC ACG FS |
| <i>hoka<sup>x127</sup></i> |    | TTG GCC TGC TGC gt. ... ... .CG GAG GCC ACG FS |
| <i>hoka<sup>x211</sup></i> |    | TTG GCC TGC TGC CTG C.. ... ..C ACG FS         |

FS: flame Shift, Small letter: insertion, Underline: target sequence

**E**

```

MKLAKKCSTY LVICLVLLAC CLOESEATRR VNRGRRTLTR RYFTGLAIPG WALIVCVAVG 60
1           SP                                       TM
ELLIGGALYF ILKKVILDKE PDQTAASYTP AQTHATATPY TPAQTHDPAT ATTYTPAQTH 120
ETANVTPTPT HATAIV                                     136

```

**Figure 1. Identification of *hoka* as an sSJ-related gene via a deficiency screen**

**(A, B)** Immunofluorescence staining of embryonic stage 16 wild-type (A) and Df(3L)ED210 (B) OELPs using an anti-Mesh antibody. Basal membranes are delineated by dots (A). Scale bar: 20  $\mu$ m.

**(C)** Physical map of the *Drosophila* 3rd-chromosome containing the *hoka* gene. Full-length genes of *hoka/CG13704* are contained in this region. The *hoka* DNA sequence used for the construction of *hoka*-RNAi (13704R-1, *hoka*IR-L, and *hoka*IR-S) is indicated by blue lines. Gray bar: untranslated regions of the *hoka* transcript/*hoka*-RA. Black bar: coding sequences of the *hoka* transcript/*hoka*-RA.

**(D)** Genomic sequences of *hoka*-mutations induced by the CRISPR/Cas9 method. The nucleotide sequence of wild-type *hoka* from the start codon is shown at the top. The guide RNA target sequence is underlined and the PAM sequence is shown in red. Deleted nucleotides are shown as dashes. Inserted nucleotides are shown in lowercase letters.

**(E)** Amino acid sequence of Hoka. The Hoka polypeptide contains a signal peptide (SP: blue), a transmembrane region (TM: red), and three Tyr-Thr-Pro-Ala (YTPA, highlighted by gray) repeat motifs in the threonine-rich (green) cytoplasmic region.

**(F–F’)** Immunofluorescence staining of the Hoka-GFP-expressing stage 16 OELP (*da-GAL4; UAS-hoka-GFP*) using anti-GFP (F, F’) and anti-Mesh (F’, F’’) antibodies. Hoka-GFP colocalizes with Mesh at sSJs.

**(G–I’)** Immunofluorescence staining of *hoka*<sup>x211</sup>-mutant (*hoka*<sup>x211</sup>, *da-GAL4*, G–G’; *hoka*<sup>x211</sup>, *UAS-hoka-GFP*, H–H’) and Hoka-GFP-expressing *hoka*<sup>x211</sup>-mutant (*hoka*<sup>x211</sup>, *da-GAL4*, *UAS-hoka-GFP*, I–I’) stage 16 OELPs using anti-GFP (G, G’, H, H’, I, I’) and anti-Mesh (G’, G’’, H’, H’’, I’, I’’) antibodies. Basal membranes are delineated by dots. Scale bar (F–I’): 5  $\mu$ m.



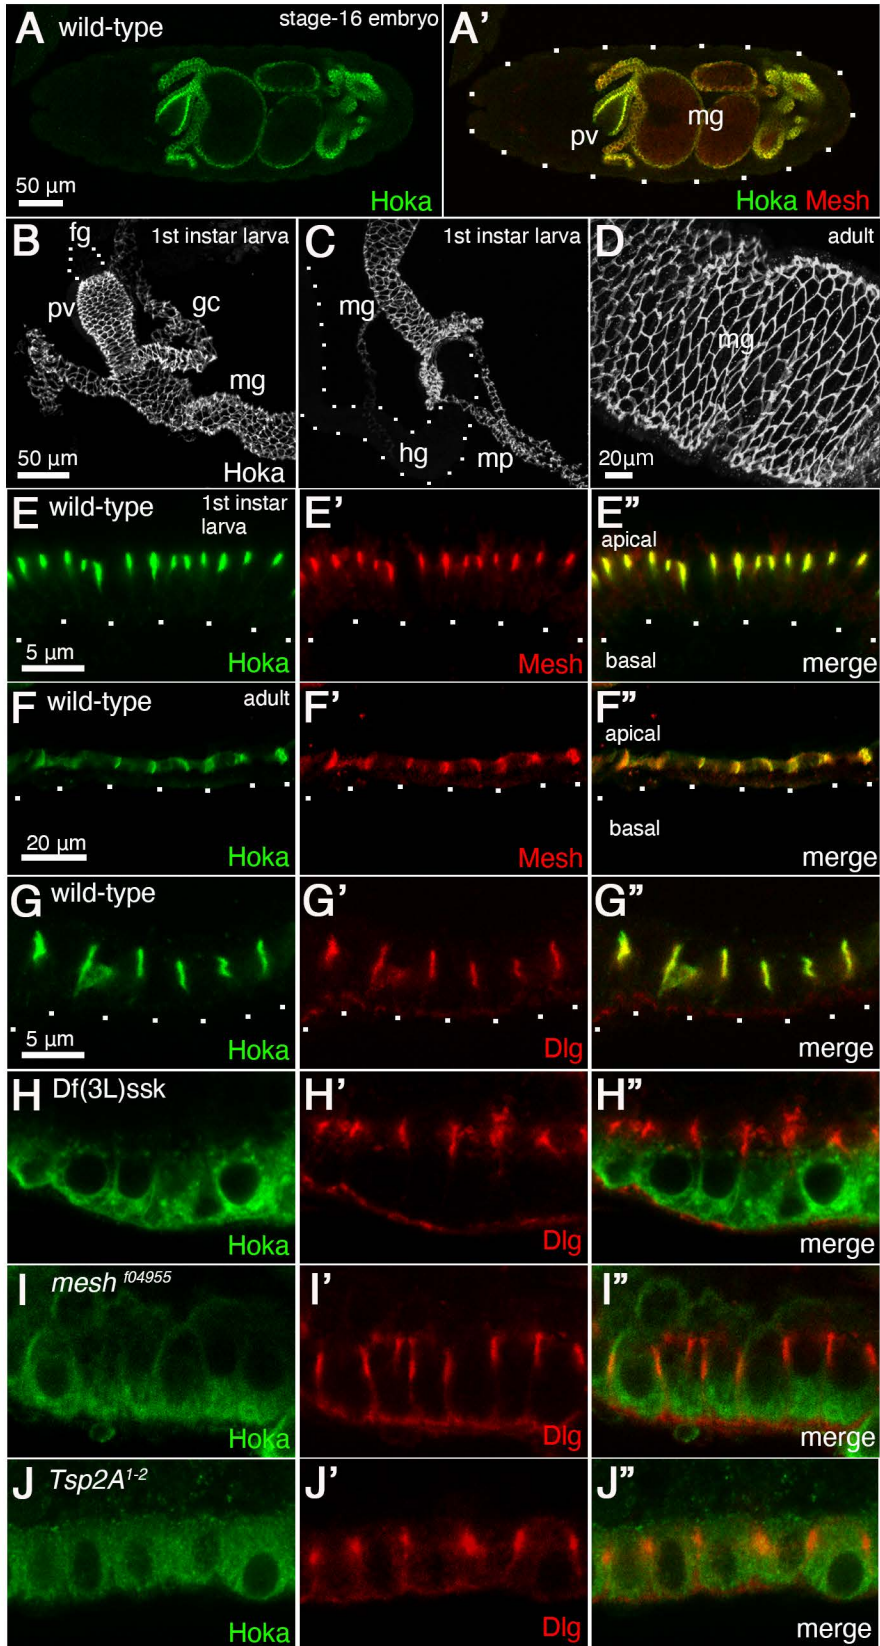

Izumi et al., Figure 2

**Figure 2. Hoka localizes to sSJs.**

**(A, A')** Immunofluorescence staining of a stage 16 wild-type embryo using anti-Hoka (A, A') and anti-Mesh (A') antibodies. pv, proventriculus; mg, midgut. The outline of the embryo is delineated by dots. Scale bar: 50  $\mu$ m.

**(B–D)** Immunofluorescence staining of the wild-type first-instar larval anterior midgut (B), posterior midgut (C), and adult midgut (D) using an anti-Hoka antibody. Hoka is expressed in the first-instar larval midgut, the OELP, and the Malpighian tubules (B, C). Hoka signals were not detected in the foregut (B) or hindgut (C). fg, foregut; pv, proventriculus; gc, gastric caeca; mg, midgut; mp, Malpighian tubules; hg, hindgut. Scale bar: 50  $\mu$ m (B, C), 20  $\mu$ m (D).

**(E–F'')** Immunofluorescence staining of the wild-type first-instar larval (E–E'') and adult (F–F'') midgut using anti-Hoka (green in E, F) and anti-Mesh (red in E', F') antibodies. Basal membranes are delineated by dots. Scale bar: 5  $\mu$ m (E), 20  $\mu$ m (F).

**(G–J'')** The first-instar larval midgut of wild-type, Df(3L)ssk, *mesh*<sup>04955</sup>-mutant, and *Tsp2A*<sup>1-2</sup>-mutant stained with anti-Hoka (green in G–J) and anti-Dlg (red in G'–J') antibodies. Scale bar: 5  $\mu$ m.

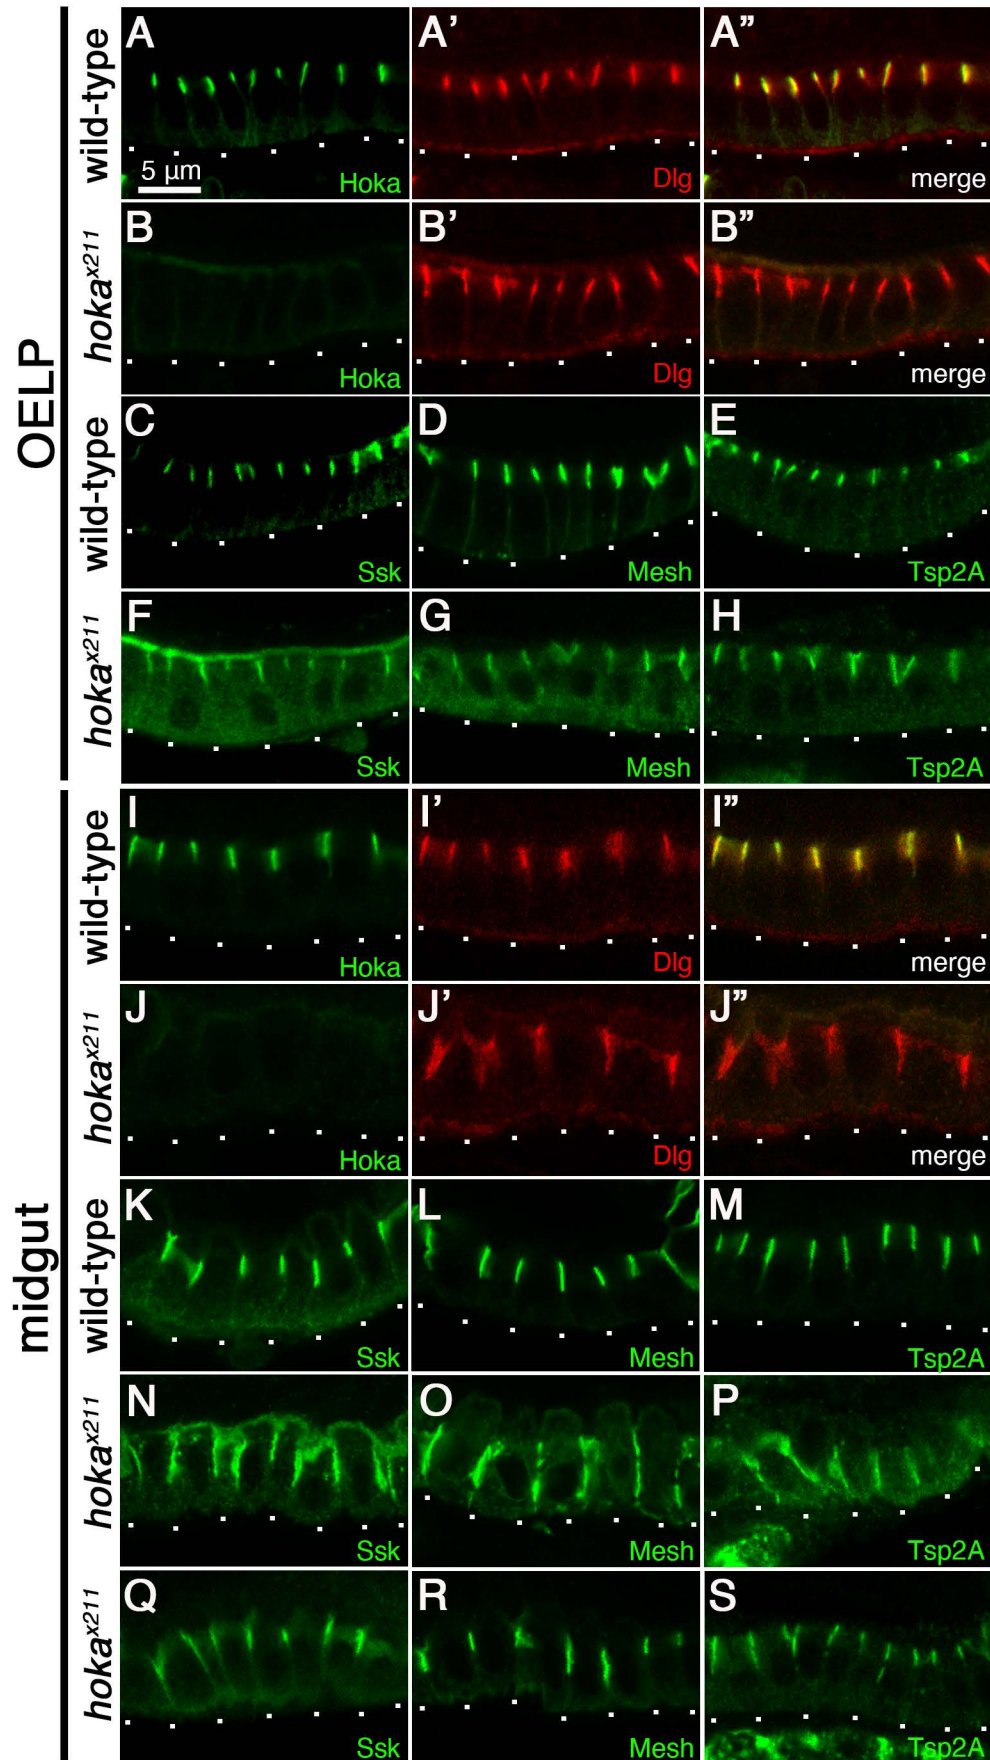

Izumi et al., Figure 3

**Figure 3. Hoka is required for the localization of sSJ-proteins.**

(A–B'') The first-instar larval OELPs of wild-type (A–A'') and *hoka*<sup>x211</sup>-mutants (B–B'') stained with anti-Hoka (green in A, A'', B, B'') and anti-Dlg (red in A', A'', B', B'') antibodies.

(C–H) The first-instar larval OELPs of wild-type (C, D, E) and *hoka*<sup>x211</sup>-mutant (F, G, H) stained with anti-Ssk (C, F), anti-Mesh (D, G) and anti-Tsp2A (E, H) antibodies.

(I–J'') The first-instar larval midgut of wild-type (I–I'') and *hoka*<sup>x211</sup>-mutant (J–J'') stained with anti-Hoka (green in I, I'', J, J'') and anti-Dlg (red in I', I'', J', J'') antibodies.

(K–S) The first-instar larval midgut of wild-type (K, L, M) and *hoka*<sup>x211</sup>-mutant (N, O, P, Q, R, S) stained with anti-Ssk (K, N, Q), anti-Mesh (L, O, R) and anti-Tsp2A (M, P, S) antibodies. Basal membranes are delineated by dots. Scale bar (A–S): 5 μm.

wild-type

*hoka*-mutant

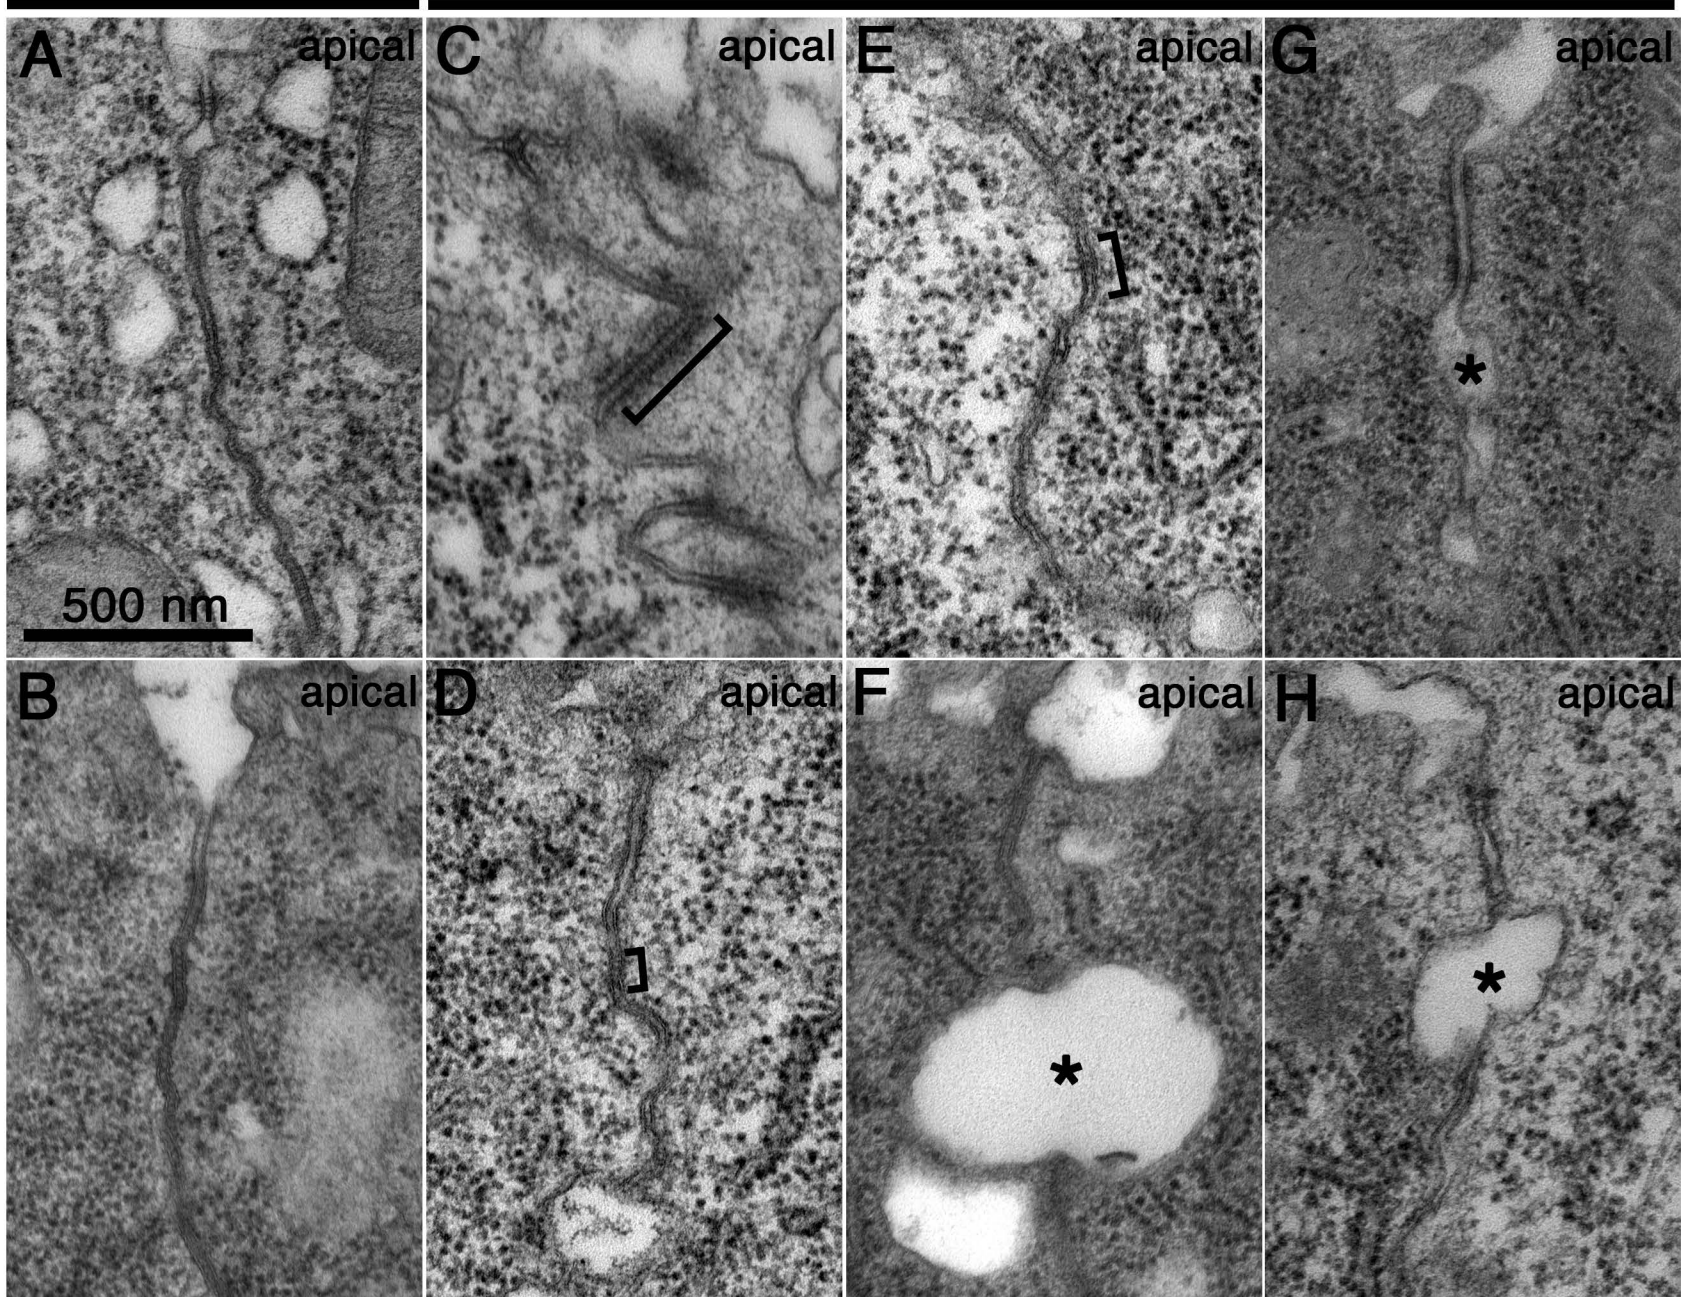

Izumi et al., Figure 4

**Figure 4. Hoka is required for the correct organization of sSJ structure.**

**(A–H)** Transmission electron microscopy of the first-instar larval midgut in wild-type (A, B) and *hoka*-mutants (C–H). In the wild-type midgut, typical sSJs are observed at bicellular contacts (A, B). In the *hoka*-mutant midgut, proper sSJ structures are barely detectable at the apicolateral region of bicellular contact (C–H), although the ladder-like structures are occasionally visible (C–E, brackets). Large gaps are often formed between the apicolateral regions of adjacent cells (F–H, asterisks). Scale bar: 500 nm.

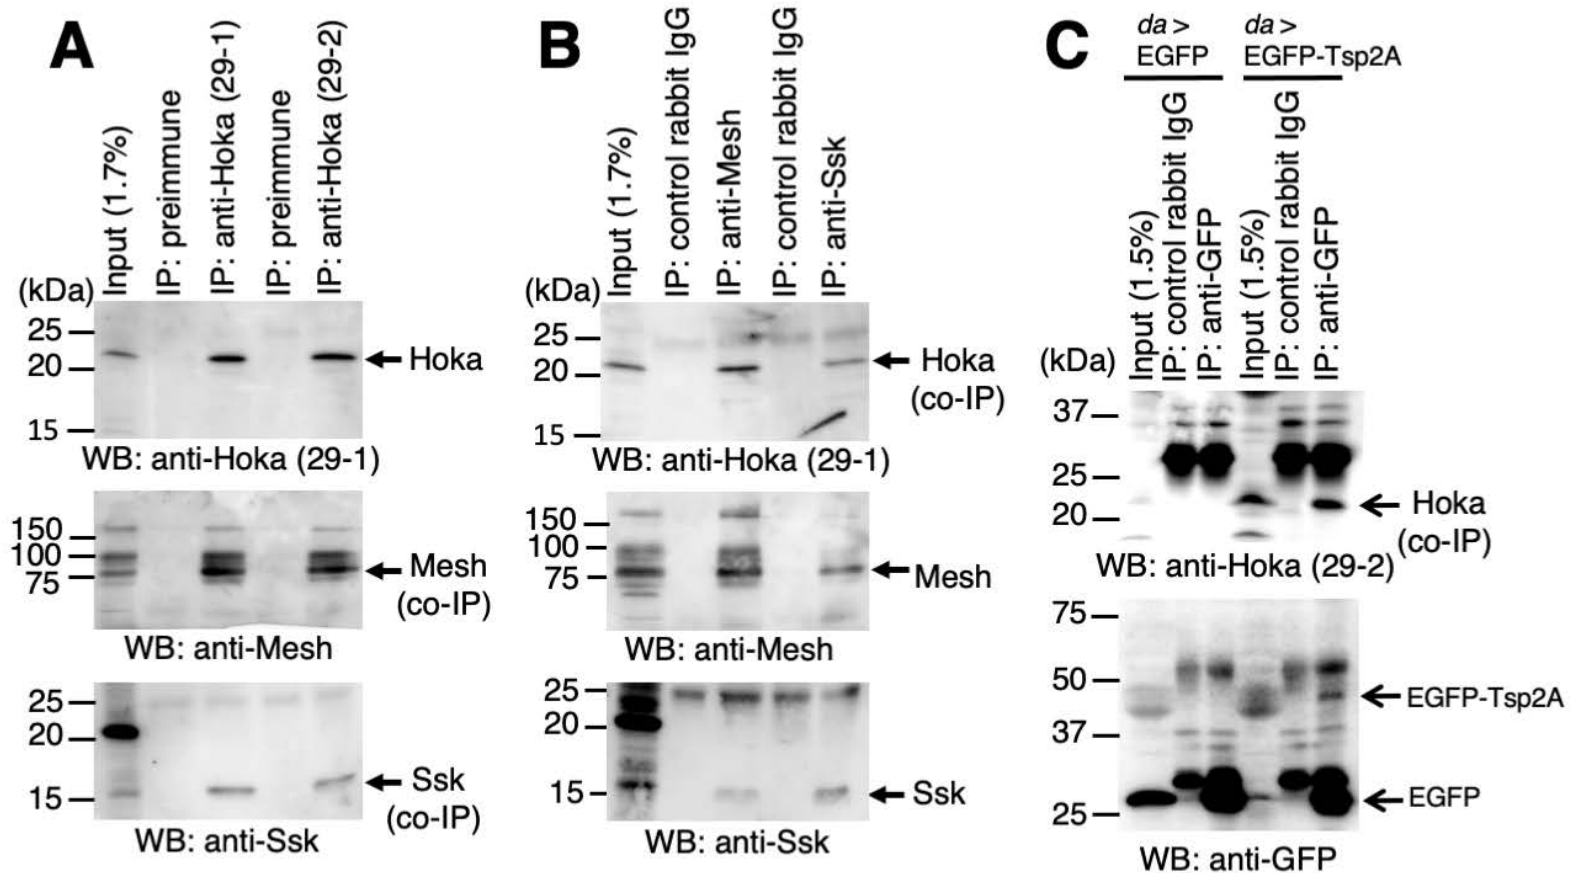

Izumi et al., Figure 5

**Figure 5. Hoka forms a complex with Ssk, Mesh, and Tsp2A.**

(A, B) Hoka co-immunoprecipitates with Ssk and Mesh. The embryonic extracts (Input) were subjected to immunoprecipitation (IP) with anti-Hoka (A), anti-Mesh (B), and anti-Ssk (B) antibodies. The immunocomplexes were separated on a 15% SDS-polyacrylamide gel, and western blot analyses were performed using anti-Hoka (upper panel), anti-Mesh (middle panel), and anti-Ssk (lower panel) antibodies. Hoka was immunoprecipitated with anti-Hoka antibodies, but not with the pre-immune serum (A, upper panel). The immunoprecipitates of Hoka contained Mesh (A, middle panel) and Ssk (A, lower panel). Mesh was immunoprecipitated with an anti-Mesh antibody, but not with a control IgG (B, middle panel). The immunoprecipitates of Mesh contained Hoka (B, upper panel) and Ssk (B, lower panel). Ssk was immunoprecipitated with an anti-Ssk antibody, but not with a control IgG (B, middle panel). The immunoprecipitates of Ssk contained Hoka (B, upper panel) and Mesh (B, lower panel).

(C) Hoka co-immunoprecipitates with EGFP-Tsp2A. Extracts of embryos expressing *da-GAL4/EGFP* or *da-GAL4/EGFP-Tsp2A* (Input) were immunoprecipitated (IP) with an anti-GFP antibody. The immunocomplexes were separated on a 15% SDS-polyacrylamide gel, and western blot analyses were performed using anti-Hoka (upper panel) or anti-GFP (lower panel) antibodies. Immunoprecipitations of EGFP-Tsp2A (~50 kDa, arrow) with an anti-GFP antibody are shown (lower panel). EGFP was immunoprecipitated with an anti-GFP antibody from the embryos that expressed EGFP (arrow in lower panel). Hoka was co-precipitated with EGFP-Tsp2A but not with EGFP (arrow in upper panel). Hoka was not precipitated with a control IgG from embryos expressing EGFP-Tsp2A. The kDa indicated on the left-hand side of the images (A–C) refer to the marker band positions.



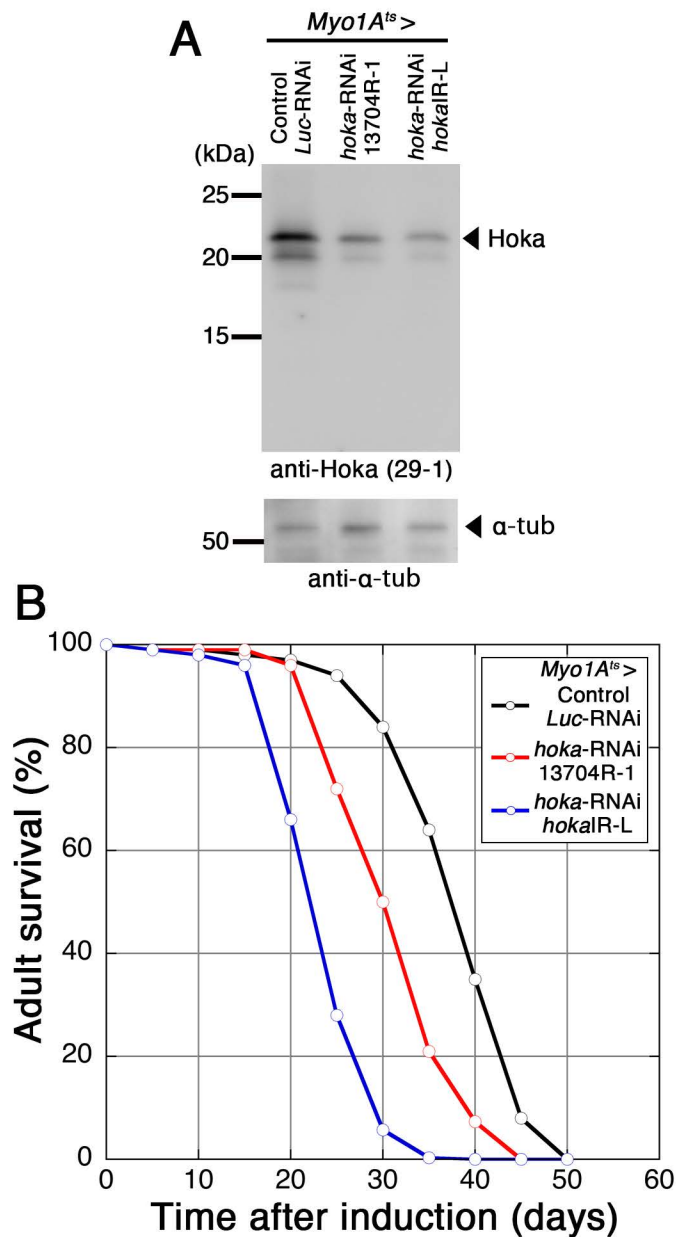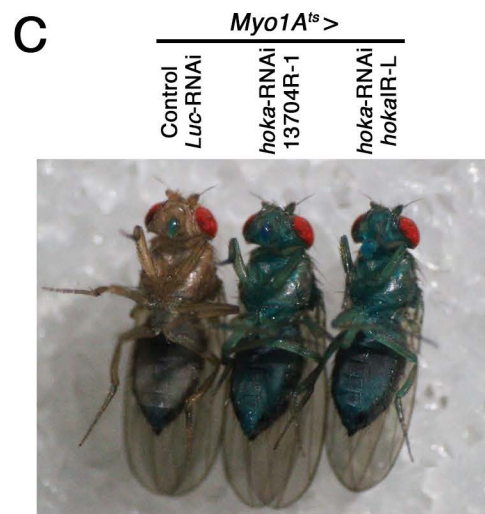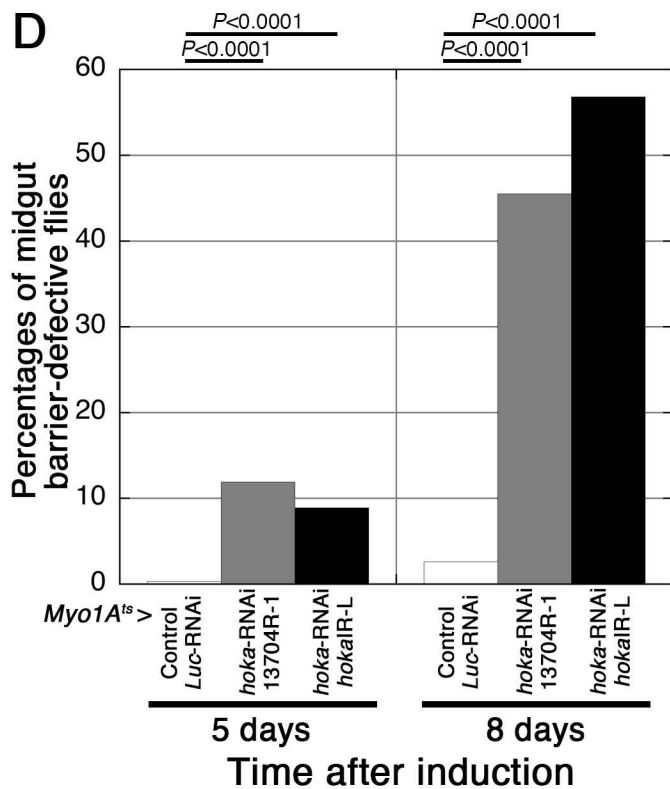

**Figure 6. Depletion of *hoka* from ECs in adult flies results in a shortened lifespan and midgut barrier dysfunction.**

(A) Western blot analyses of the *hoka*-RNAi adult midgut. Extracts of the adult midgut prepared from control (*Myo1A<sup>ts</sup>*-Gal4/UAS-*Luc*-RNAi) or *hoka*-RNAi (*Myo1A<sup>ts</sup>*-Gal4/UAS-*hoka*-RNAi 13704R-1 or *hoka*IR-L) flies at 10 days after induction were separated on a 15% SDS-polyacrylamide gel, and western blot analyses were performed using the anti-Hoka (29-1, upper panel) and anti- $\alpha$ -tubulin (lower panel) antibodies.

(B) Survival analysis of flies expressing *Myo1A<sup>ts</sup>*-Gal4 with UAS-*Luc*-RNAi (control,  $n=300$ ), UAS-*hoka*-RNAi 13704R-1 ( $n=300$ ), or UAS-*hoka*-RNAi *hoka*IR-L (15074R-1) ( $n=300$ ). The transgenes were expressed with GAL80<sup>ts</sup>; therefore, the flies were raised at 18°C until adulthood and were then moved to 29°C. Each vial contained 30 flies (15 females, 15 males). Median lifespan; *Luc*-RNAi: 37 days, *hoka*-RNAi 13704R-1: 30 days, *hoka*IR-L: 22 days.

(C, D) Barrier integrity (Smurf) assays. Flies expressing *Myo1A<sup>ts</sup>*-Gal4 with UAS-*Luc*-RNAi (control), UAS-*hoka*-RNAi 13704R-1, or UAS-*hoka*-RNAi *hoka*IR-L were fed blue dye in sucrose solution. (C) A control fly and midgut barrier-defective Hoka-deficient flies with blue bodies at 8 days after transgene induction. (D) Left to right: Control ( $n=365$ ), *hoka*-RNAi 13704R-1 ( $n=379$ ), and *hoka*-RNAi *hoka*IR-L ( $n=471$ ) at 5 days after induction, control ( $n=582$ ), *hoka*-RNAi 13704R-1 ( $n=233$ ), and *hoka*-RNAi *hoka*IR-L ( $n=324$ ) at 8 days after induction. The loss of midgut barrier function was determined when the dye was observed outside the midgut. Flies with blue color throughout the body were judged midgut barrier-defective flies although the tone of the color varied depending on the affected flies. *hoka*-RNAi flies showed the loss of barrier function compared with control flies. The  $p$ -values in (D) represent significant differences in pairwise post-test comparisons indicated by the corresponding bars (Fisher's exact test).

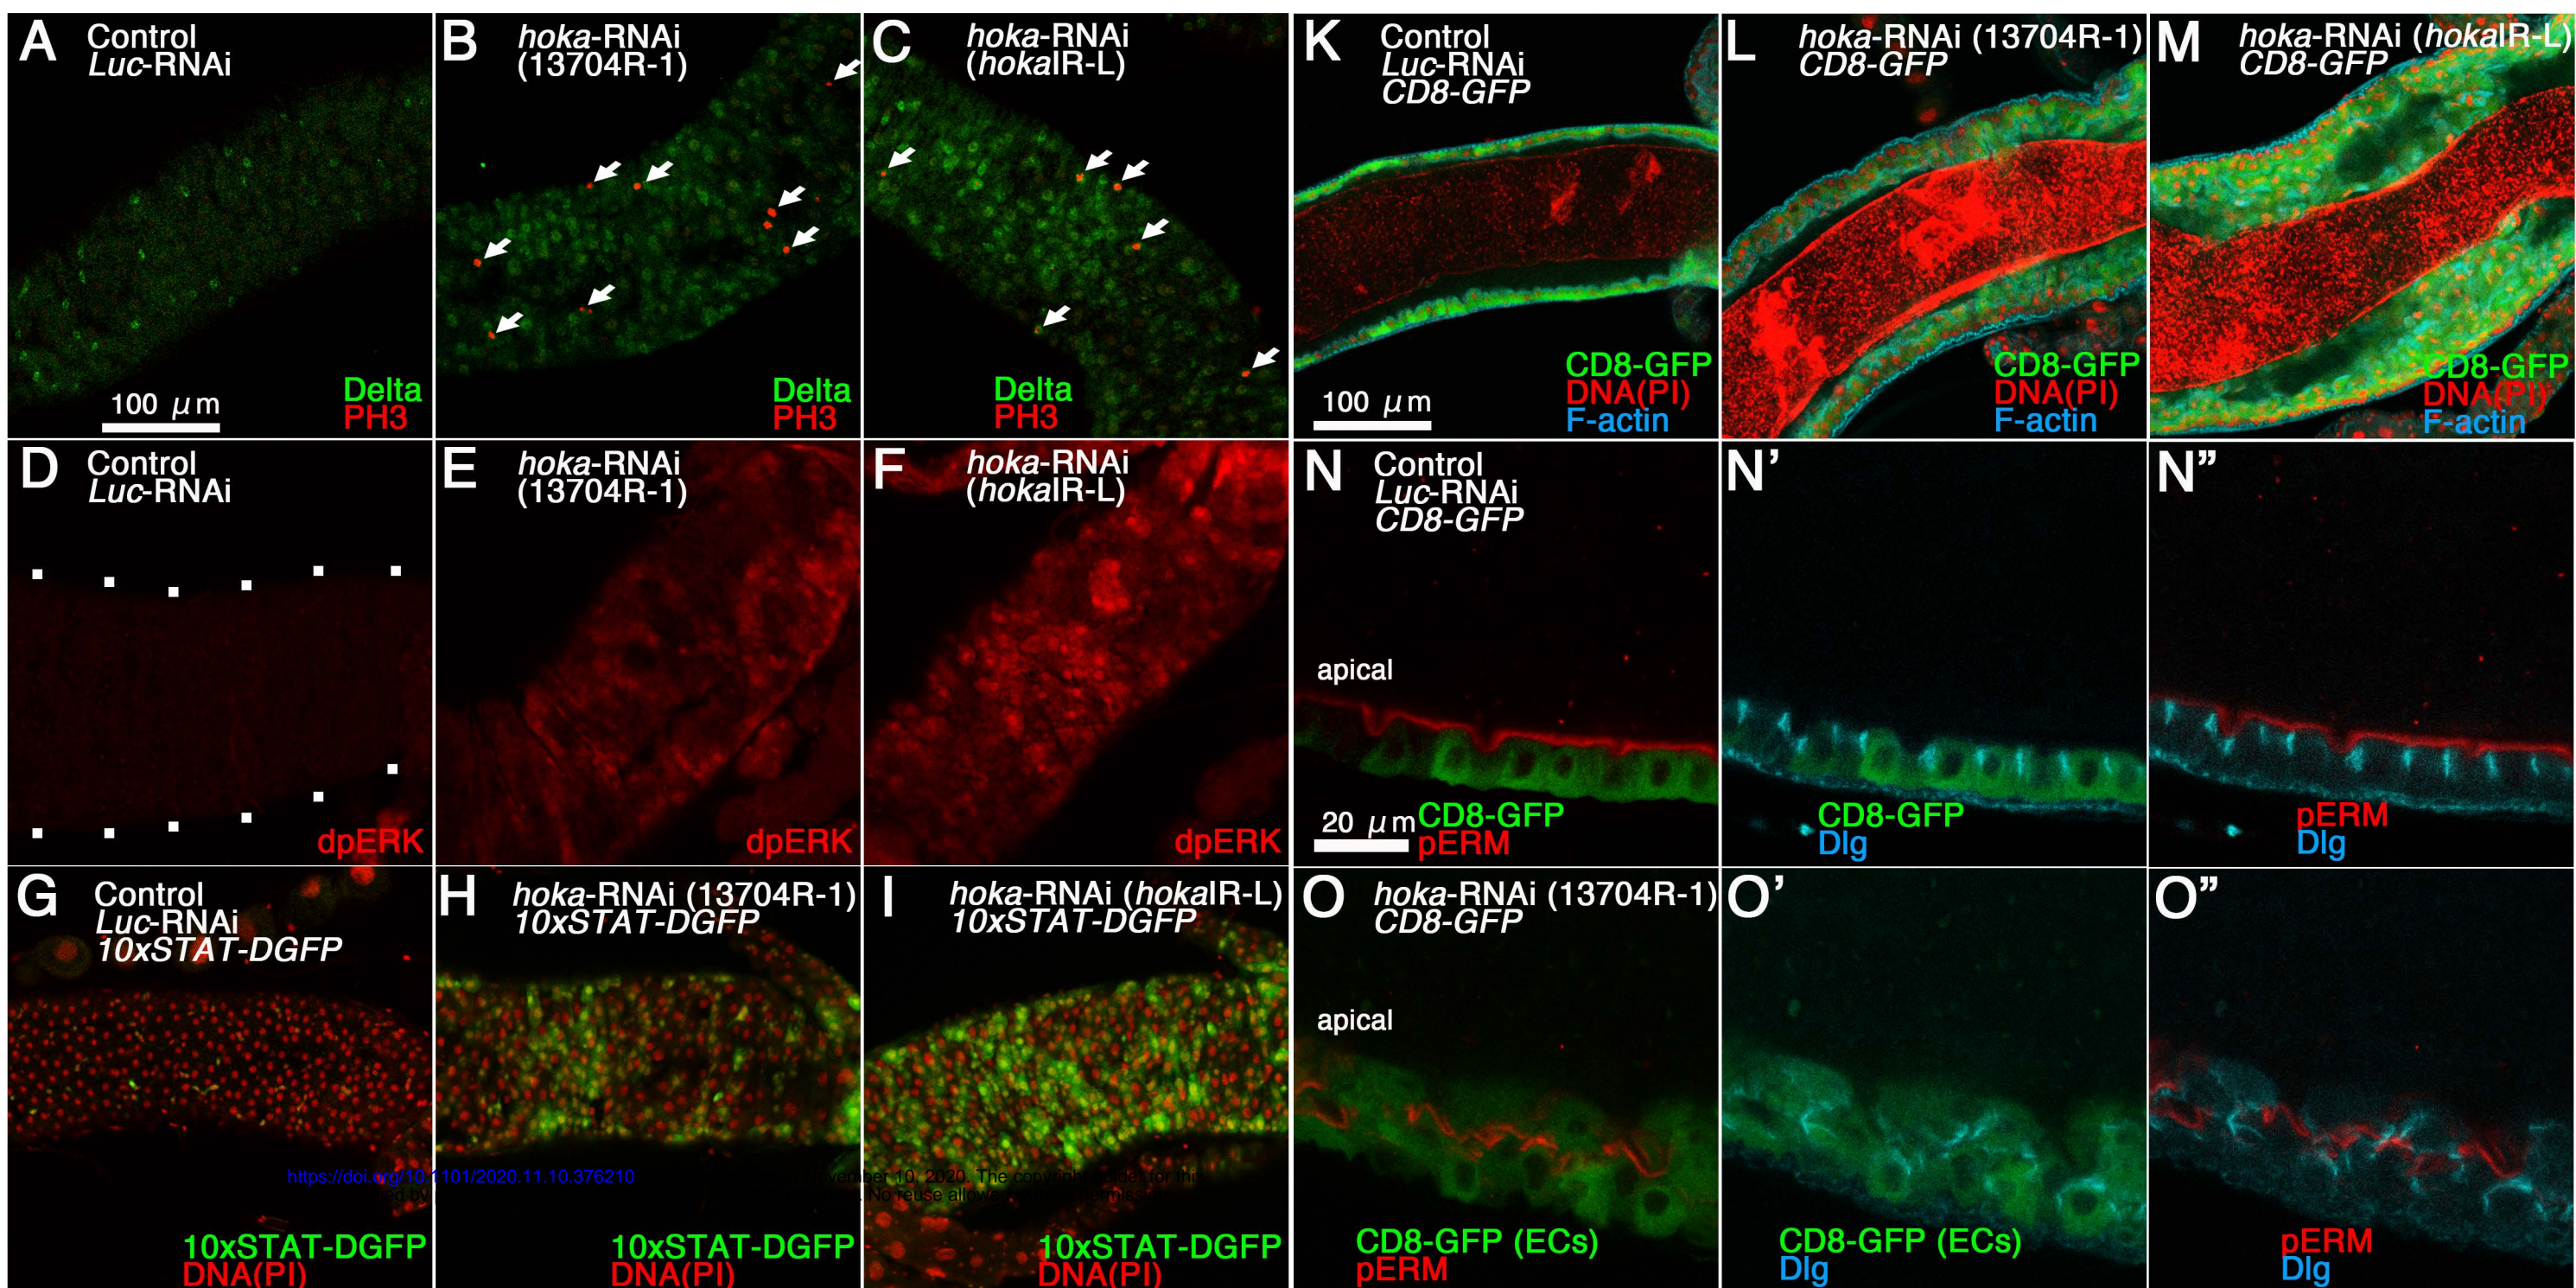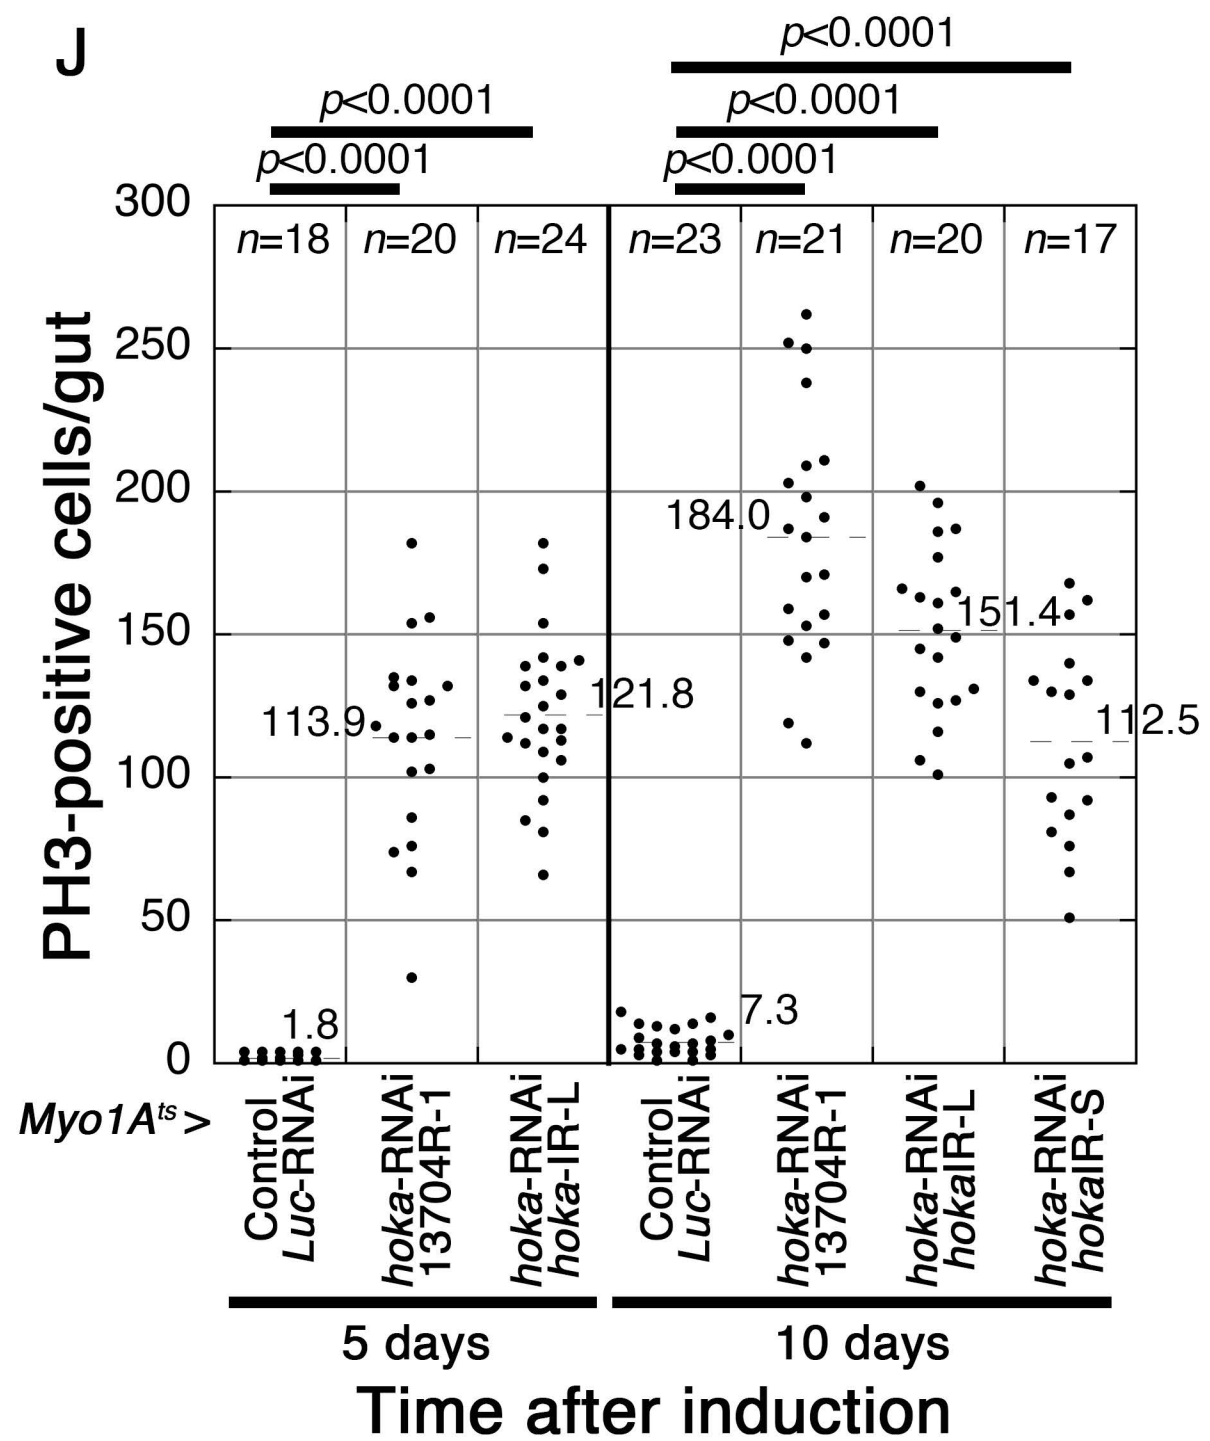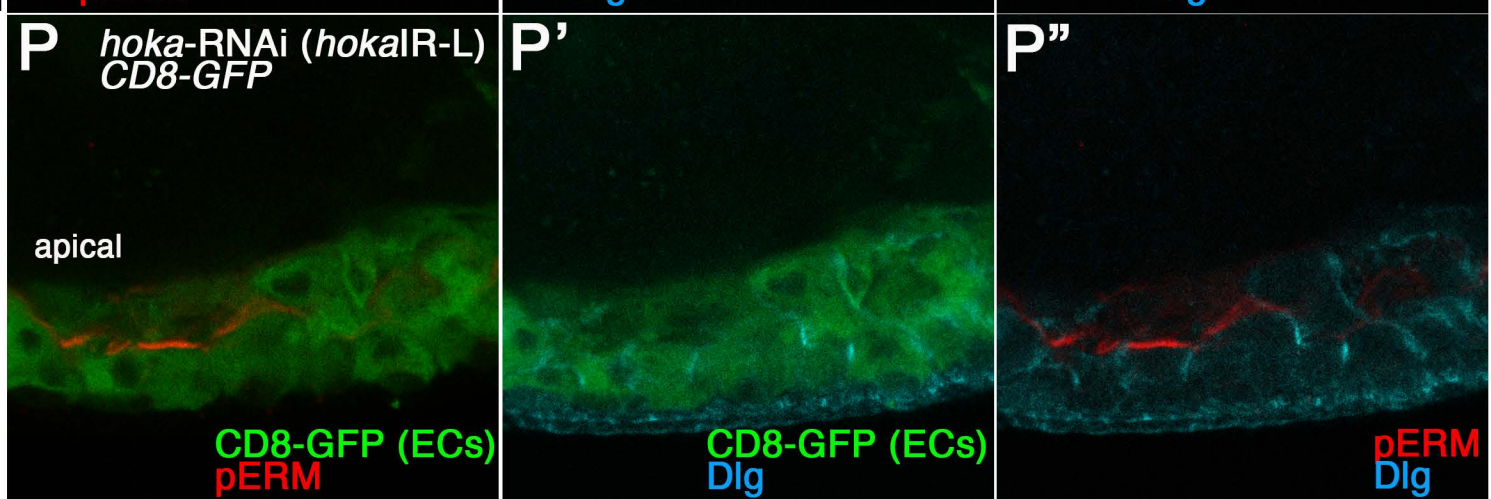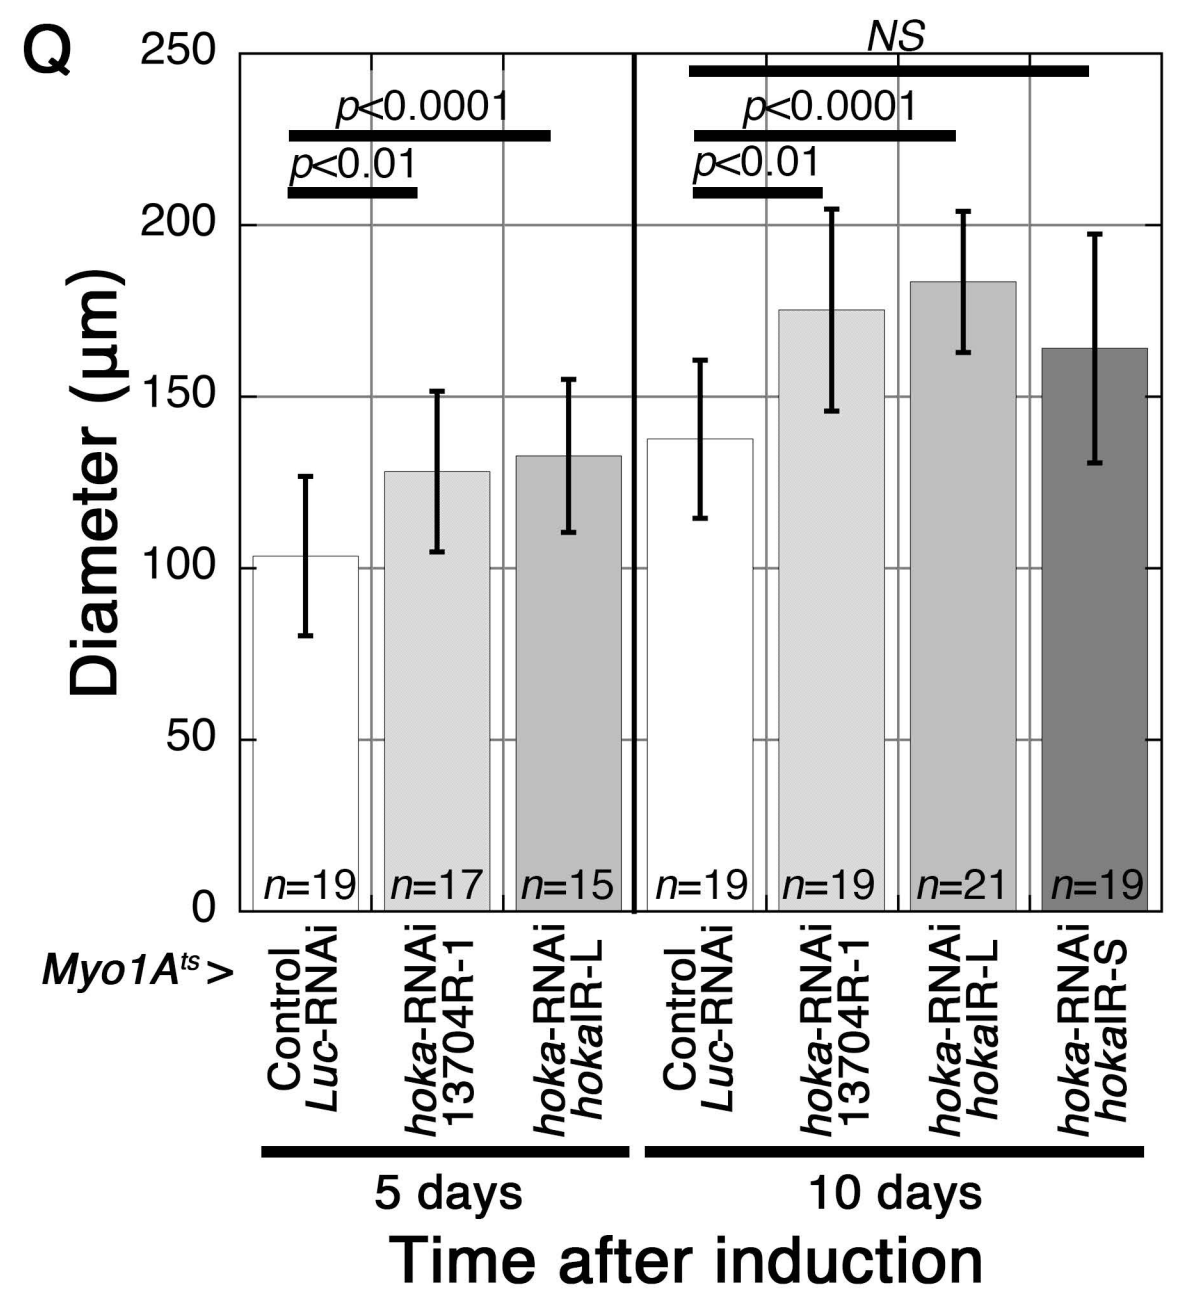

**Figure 7. The depletion of *hoka* from ECs leads to increased ISC proliferation and accumulation of ECs in the adult midgut.**

(A–C) Confocal images of the adult posterior midgut expressing *Myo1A<sup>ts</sup>*-Gal4 with UAS-*Luc*-RNAi (control, A), UAS-*hoka*-RNAi 13704R-1 (B), or UAS-*hoka*-RNAi *hoka*IR-L (C) at 10 days after induction and stained for PH3 (red, arrows), and Delta (green). The images show the surface views of the midgut.

(D–F) Confocal images of the adult posterior midgut expressing *Myo1A<sup>ts</sup>*-Gal4 with UAS-*Luc*-RNAi (control, D), UAS-*hoka*-RNAi 13704R-1 (E), or UAS-*hoka*-RNAi *hoka*IR-L (F) at 10 days after induction and stained for dpERK (red). The images show the surface views of the midgut. The enhancement of Ras-MAPK pathway activity in the *hoka*-RNAi midgut is shown by the increased expression of dpERK (E, F). The outline of the midgut is delineated by dots (D).

(G–I) Confocal images of the adult posterior midgut expressing *Myo1A<sup>ts</sup>*-Gal4/*10xSTAT-DGFP* with UAS-*Luc*-RNAi (control, G), UAS-*hoka*-RNAi 13704R-1 (H), or UAS-*hoka*-RNAi *hoka*IR-L (I) at 10 days after induction and stained for GFP (green) and DNA (propidium iodide) (red). The enhancement of the Jak-Stat pathway activity in the *hoka*-RNAi midgut is shown by the increased expression of the *10xSTAT-DGFP* reporter (H, I). The images show the surface views of the midgut. Scale bar (A–I): 100  $\mu$ m.

(J) Quantification of PH3-positive cells. The dot-plots show the numbers of PH3-positive cells in the individual midguts. Left to right: Control ( $n=18$ ), *hoka*-RNAi 13704R-1 ( $n=20$ ) and *hoka*-RNAi *hoka*IR-L ( $n=24$ ) at 5 days after induction, Control ( $n=23$ ), *hoka*-RNAi 13704R-1 ( $n=21$ ), *hoka*-RNAi *hoka*IR-L ( $n=20$ ), and *hoka*-RNAi *hoka*IR-S ( $n=17$ ) at 10 days after induction. The bars and numbers in the graph represent the mean PH3-positive cells in the fly lines. Statistical significance ( $p<0.0001$ ) was evaluated by one-way ANOVA/Tukey's multiple comparisons tests.

(K–M) Confocal images of the adult posterior midgut expressing *Myo1A<sup>ts</sup>*-Gal4/UAS-*CD8-GFP* with UAS-*Luc*-RNAi (control, K), UAS-*hoka*-RNAi 13704R-1 (L), or UAS-*hoka*-RNAi *hoka*IR-L (M) at 10 days after induction and stained for CD8-GFP (green), DNA (propidium iodide) (red), and F-actin (blue). The images show longitudinal cross-sections through the center of the midgut. CD8-GFP driven by *Myo1A<sup>ts</sup>* was expressed in the ECs of each midgut. Scale bar: 100  $\mu$ m.

(N–P'') Confocal images of the adult posterior midgut expressing *Myo1A<sup>ts</sup>*-Gal4/UAS-*CD8-GFP* with UAS-*Luc*-RNAi (control, N–N''), UAS-*hoka*-RNAi 13704R-1 (O–O''), or UAS-*hoka*-RNAi *hoka*IR-L (P–P'') at 10 days after induction and stained for pERM (red in N, N'', O, O'', P, P'') and Dlg (blue in N', N'', O', O'', P', P''). The images show the longitudinal cross-sections through the center of the midgut. CD8-GFP driven by

*MyoIA<sup>ts</sup>* was expressed in the ECs of each midgut. Scale bar: 20  $\mu$ m.

**(Q)** The diameter of the posterior region of the midgut. The diameter of the midgut was measured just anterior to the Malpighian tubules. Left to right: Control ( $n=19$ ), *hoka*-RNAi 13704R-1 ( $n=17$ ), and *hoka*-RNAi *hoka*IR-L ( $n=15$ ) at 5 days after induction, Control ( $n=19$ ), *hoka*-RNAi 13704R-1 ( $n=19$ ), *hoka*-RNAi *hoka*IR-L ( $n=21$ ), and *hoka*-RNAi *hoka*IR-S ( $n=19$ ) at 10 days after induction. Error bars indicate the SEM. Statistical significance ( $p<0.0001$ ) was evaluated using one-way ANOVA/Tukey's multiple comparisons tests.

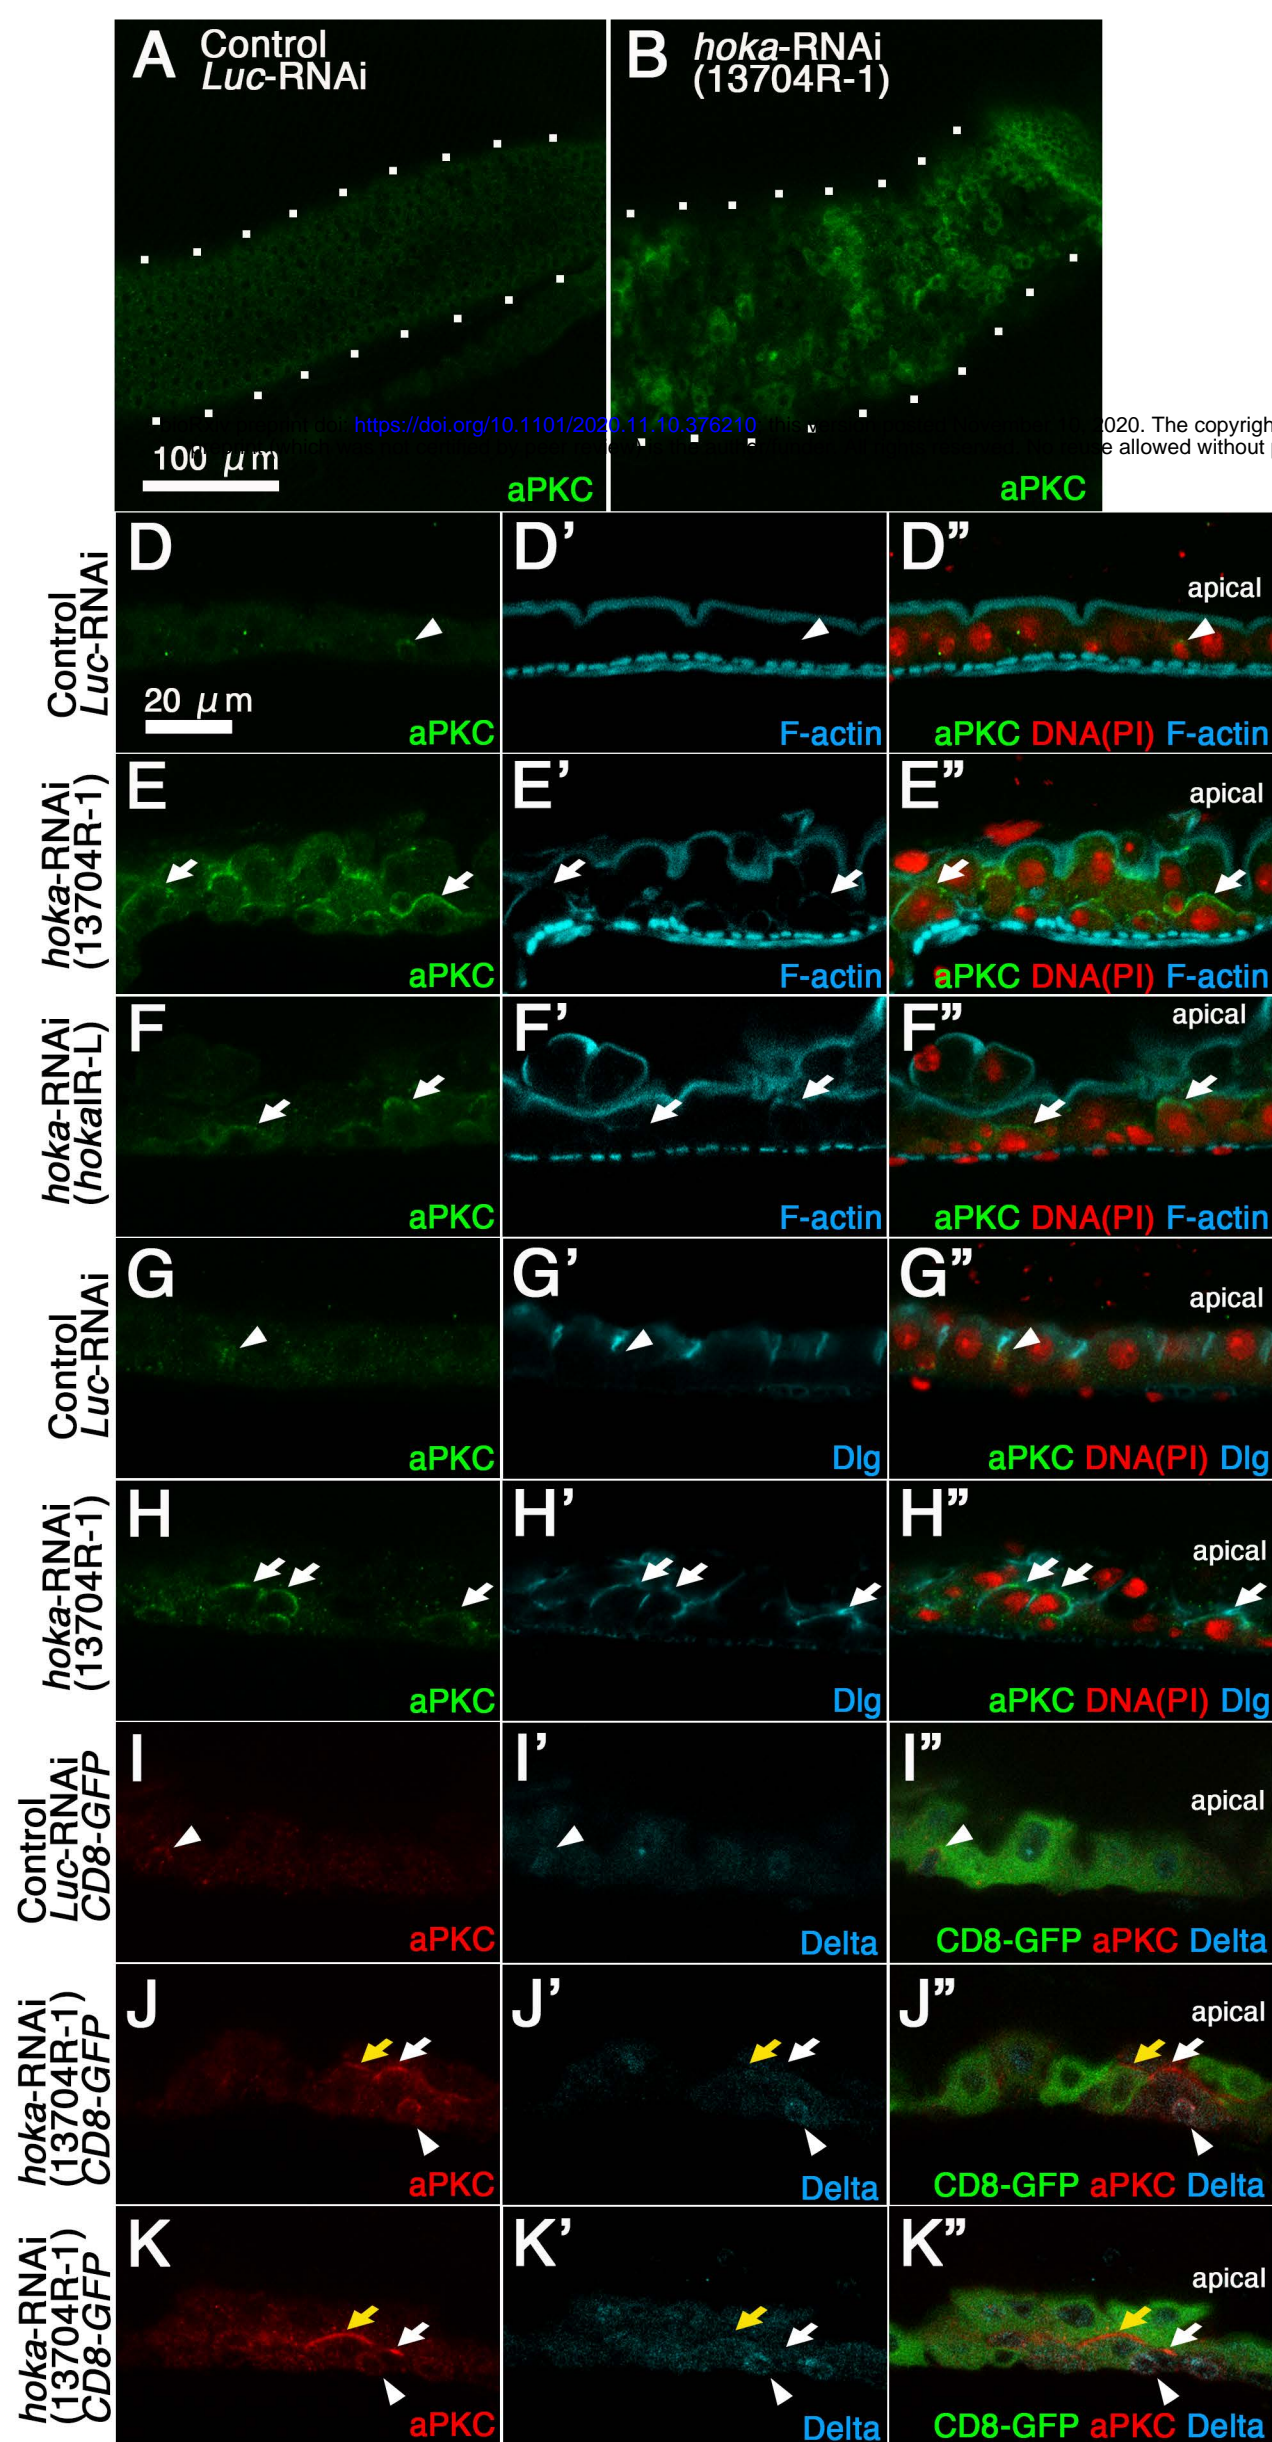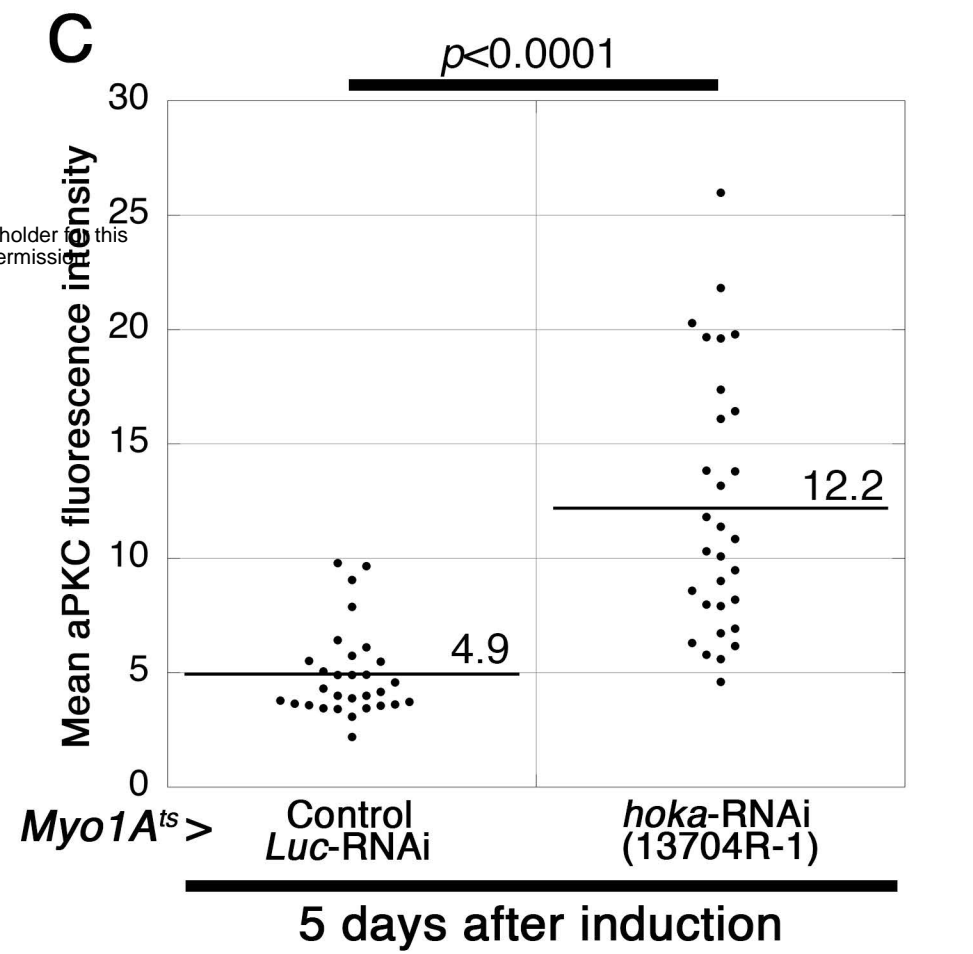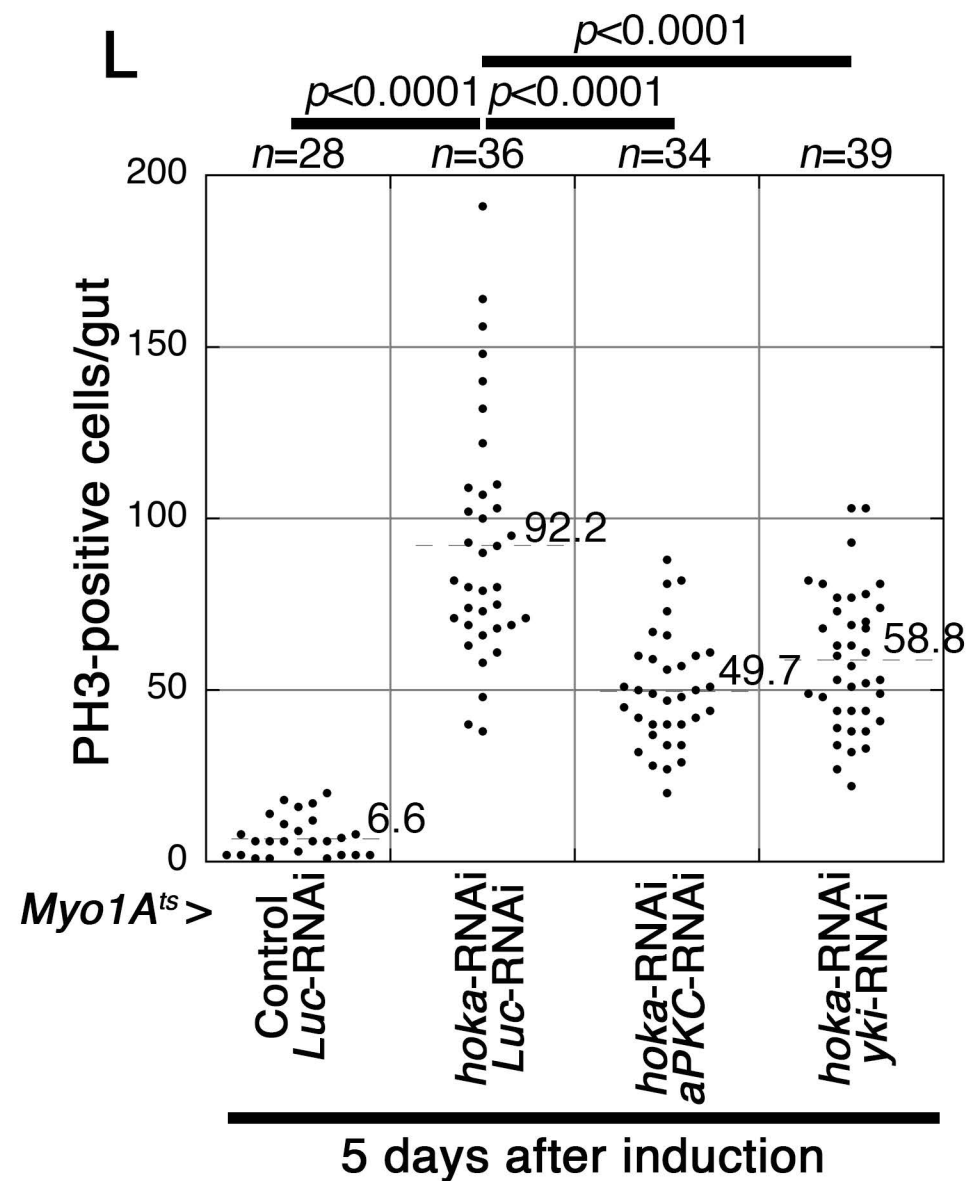

**Figure 8. The depletion of *aPKC* and *yki* from *hoka*-RNAi ECs results in the reduction of ISC overproliferation caused by *hoka*-RNAi.**

(A, B) Confocal images of the adult posterior midgut expressing *Myo1A<sup>ts</sup>*-Gal4 with UAS-*Luc*-RNAi (control, A) or UAS-*hoka*-RNAi 13704R-1 (B) at 5 days after induction and stained for aPKC (green). The images show the surface views of the midgut. The outline of the midgut is delineated by dots. Scale bar: 100  $\mu$ m.

(C) Dot-plots showing the mean aPKC fluorescence intensity in the posterior midgut. The bars and the numbers in the graph display the mean fluorescence intensity of the control (*Luc*-RNAi) or *hoka*-RNAi 13704R-1 midgut. The mean fluorescence intensity was calculated from three random (100  $\mu$ m x 100  $\mu$ m) fields per midgut ( $n=10$  for each genotype). Statistical significance ( $P<0.001$ ) was determined using the Mann-Whitney *U* test.

(D–H'') Confocal images of the adult posterior midgut expressing *Myo1A<sup>ts</sup>*-Gal4 with UAS-*Luc*-RNAi (control, D–D'', G–G''), UAS-*hoka*-RNAi 13704R-1 (E–E'', H–H''), or UAS-*hoka*-RNAi *hoka*IR-L (F–F'') at 5 days after induction and stained for aPKC (green in D–H, D''–H''), F-actin (blue in D'–F', D''–F''), and Dlg (blue in G', G'', H', H''). The arrowheads indicate the cells with apical aPKC staining and a small nucleus in the control midgut. The arrows indicate cells with apical aPKC staining and a large nucleus in the *hoka*-RNAi midgut. The images show the longitudinal cross-sections through the center of the midgut.

(I–K'') Confocal images of the adult posterior midgut expressing *Myo1A<sup>ts</sup>*-Gal4/UAS-*CD8-GFP* with UAS-*Luc*-RNAi (control, I–I'') or UAS-*hoka*-RNAi 13704R-1 (J–K'') at 5 days after induction and stained for aPKC (red in I, I'', J, J'', K, K'') and Delta (blue in I', I'', J', J'', K', K''). The arrowheads indicate Delta and aPKC double-positive cells. The arrows and the yellow arrows indicate the apical aPKC-positive and CD8-GFP-negative cells, and the apical aPKC and CD8-GFP-double positive cells, respectively. CD8-GFP driven by *Myo1A<sup>ts</sup>* was expressed in the ECs of each midgut. The images show the longitudinal cross-sections through the center of the midgut. Scale bar (D–K''): 20  $\mu$ m.

(L) Quantification of PH3-positive cells. The dot-plots show the numbers of PH3-positive cells in the individual midguts. Left to right: Control ( $n=28$ ), *hoka*-RNAi 13704R-1 together with *Luc*-RNAi ( $n=36$ ), *hoka*-RNAi 13704R-1 together with *aPKC*-RNAi HMS01411 ( $n=34$ ), and *hoka*-RNAi 13704R-1 together with *yki*-RNAi JF03119 ( $n=39$ ) at 5 days after induction. Bars and numbers in the graph represent the mean PH3-positive cells in the fly lines. Statistical significance ( $p<0.0001$ ) was evaluated by one-way ANOVA/Tukey's multiple comparisons tests.

|       | Signal peptide                                                                                                                                                       | Transmembrane region |
|-------|----------------------------------------------------------------------------------------------------------------------------------------------------------------------|----------------------|
| DROME | MKLA <span style="background-color: yellow;">KKCSTYLVICLVLLACCLQE</span> SEATR <span style="background-color: yellow;">RVNRGRRTLRRYFTGLAIPGWALIVCVAVGELLIGGA</span>  |                      |
| DROPE | MKLA <span style="background-color: yellow;">KKCSTYLVICLVLLACCLEE</span> TEATR <span style="background-color: yellow;">RVNRGRRTLRRYFNGLAIPGWAMICVALGELIVGGA</span>   |                      |
| DROPS | MKLA <span style="background-color: yellow;">KKCSTYLVICLVLLACCLEE</span> TEATR <span style="background-color: yellow;">RVNRGRRTLRRYFNGLAIPGWAMICVALGELIVGGA</span>   |                      |
| DROYA | MKLA <span style="background-color: yellow;">KKCSTYLLICLVLLACCLQE</span> SEATR <span style="background-color: yellow;">RVNRGRRTLRRYFTGLAIPGWALIVCVLAELLVGGGA</span>  |                      |
| DROER | MKLA <span style="background-color: yellow;">KKCSTYLLICLVLLACCLQE</span> SEATR <span style="background-color: yellow;">RVNRGRRTLRRYFTGLAIPGWALIVCVAVGELIVGGA</span>  |                      |
| DROSE | MKLA <span style="background-color: yellow;">KKCSTYLVICLVLLACCLQE</span> SEATR <span style="background-color: yellow;">RVNRGRRTLRRYFTGLAIPGWALIVCVAVGELLIGGA</span>  |                      |
| DROSI | MKLA <span style="background-color: yellow;">KKCSTYLVICLVLLACCLQE</span> SEATR <span style="background-color: yellow;">RVNRGRRTLRRYFTGLAIPGWALIVCVAVGELLIGGA</span>  |                      |
| DROFC | MKLA <span style="background-color: yellow;">KKCSTYLLICLVLLACCLQE</span> SEATR <span style="background-color: yellow;">RVNRGRRTLRRYFTGLAIPGWALIVCVAVGELLIGGA</span>  |                      |
| DROAN | MKLA <span style="background-color: yellow;">KKCSTYLVICLVLLACMPETE</span> ATR <span style="background-color: yellow;">RVNRGRRTLRRYFTGLAIPGWALVVCIALAELLIGGA</span>   |                      |
| DROWI | MKLA <span style="background-color: yellow;">KKCSTYLVICLVLMACLMQETE</span> ATR <span style="background-color: yellow;">RVNRGRRTLRRYFSGLAIPGWALIVCVAIAELLVGGGA</span> |                      |
| DROVI | MMWP <span style="background-color: yellow;">KKCSTYLVICLVLLACFMQETE</span> ATR <span style="background-color: yellow;">RVNRGRRTLRRYFSGLAIPGWALIVCIVALAELLIGGA</span> |                      |
| DROMO | MMLL <span style="background-color: yellow;">KKFSTCLMICLVLLACCLQE</span> TEATR <span style="background-color: yellow;">RVNRGRRTLRRYFTGLAIPGWAVVTCVAVAEELLGAA</span>  |                      |
| ANOGA | MHI <span style="background-color: yellow;">IKNKAVYFTLMLVLLSMCLDQTE</span> ARR <span style="background-color: yellow;">KILRGRRTINRTFKRGPMPAWAIIITIVAIVNLLGGI</span>  |                      |
| ANODA | MHIL <span style="background-color: yellow;">KHKAVYFTLMLVLLSMCMDQTE</span> ARR <span style="background-color: yellow;">KILRGRRTINRTFKRGPFIPAWAIITIVAIVNLLGGI</span>  |                      |
| AEDAE | MQL <span style="background-color: yellow;">FRKRAFVFALLLVLSMCLTE</span> EARR <span style="background-color: yellow;">KILRGRRTITRTHKRGTAIPAWAIVTLVGIANILLGGL</span>   |                      |
| CULQU | MQL <span style="background-color: yellow;">LRKRAFVFTILLVLSVCLTE</span> EARR <span style="background-color: yellow;">KILRGRRTITRKYKRGTAIPAWAISLVGIGYILLGGI</span>    |                      |
| MELCN | MGQR <span style="background-color: yellow;">KSIWFYVAVVVLVILSTLTSEVD</span> ARR <span style="background-color: yellow;">KILRGRVMTRTYRGNVPAWAIISLMAGIGMLIVGGI</span>  |                      |

|       |                                                                                                                                                                                                                                                              |
|-------|--------------------------------------------------------------------------------------------------------------------------------------------------------------------------------------------------------------------------------------------------------------|
| DROME | LYFIL <span style="background-color: yellow;">KKVILDKEPDQ</span> TAA_S <span style="background-color: yellow;">YTPA</span> QTH_ATATP <span style="background-color: yellow;">YTPA</span> QTHDPATATT <span style="background-color: yellow;">YTPA</span> QTHE |
| DROPE | LYFIM <span style="background-color: yellow;">KKLILDKEPDE</span> TAT <span style="background-color: yellow;">SYTPA</span> _____AT <span style="background-color: yellow;">TYTPA</span> _____ATT <span style="background-color: yellow;">YTPA</span> QTHE     |
| DROPS | LYFIM <span style="background-color: yellow;">KKLILDKEPDE</span> TAT <span style="background-color: yellow;">SYTPA</span> _____AT <span style="background-color: yellow;">TYTPA</span> _____ATT <span style="background-color: yellow;">YTPA</span> QTHE     |
| DROYA | LYLIL <span style="background-color: yellow;">KKVILDKEPDQ</span> TAA_S <span style="background-color: yellow;">YTPA</span> QTH_ATATP <span style="background-color: yellow;">YTPA</span> QTHDPATATT <span style="background-color: yellow;">YTPA</span> QTHE |
| DROER | LYFIL <span style="background-color: yellow;">KKVILDKEPDQ</span> TAA_S <span style="background-color: yellow;">YTPA</span> QTH_ETATP <span style="background-color: yellow;">YTPA</span> QTHDPAPATT <span style="background-color: yellow;">YTPA</span> QTHE |
| DROSE | LYFIL <span style="background-color: yellow;">KKVILDKEPDQ</span> TAA_S <span style="background-color: yellow;">YTPA</span> QTH_PTATP <span style="background-color: yellow;">YTPA</span> QTHDPSTATT <span style="background-color: yellow;">YTPA</span> QTHE |
| DROSI | LYFIL <span style="background-color: yellow;">KKVILDKEPDE</span> TAA_S <span style="background-color: yellow;">YTPA</span> QTH_PTATP <span style="background-color: yellow;">YTPA</span> QTHDPATATT <span style="background-color: yellow;">YTPA</span> QTHE |
| DROFC | LYFIL <span style="background-color: yellow;">KKVILDQEPDE</span> TAA <span style="background-color: yellow;">SYTPA</span> KTHDPAT <span style="background-color: yellow;">YTPA</span> QTHEP_A <span style="background-color: yellow;">STYTPA</span> QTHE     |
| DROAN | IPGWALIVCIVALAELLIGGALYFIL <span style="background-color: yellow;">KKVILDTEPDDKAAS</span> <span style="background-color: yellow;">YTPA</span> PTT <span style="background-color: yellow;">YTPA</span> QTHDPETVTPQ                                            |
| DROWI | LYFVM <span style="background-color: yellow;">YKIVILAKEP</span> DE_____ATT <span style="background-color: yellow;">YTPA</span> QTHE                                                                                                                          |
| DROVI | LYFAM <span style="background-color: yellow;">YKIIILDKEPE</span> Q_____AST <span style="background-color: yellow;">YTPA</span> PTHDPSSAGVQ                                                                                                                   |
| DROMO | LYFAM <span style="background-color: yellow;">YKIIILDKEPE</span> Q_____AST <span style="background-color: yellow;">YTPA</span> PTHDPSSGTAQPVQ                                                                                                                |
| ANOGA | AYLIF <span style="background-color: yellow;">RKVVLNAPI</span> EN_____VTS <span style="background-color: yellow;">YTPA</span> _MQDEYSS                                                                                                                       |
| ANODA | AYLIF <span style="background-color: yellow;">RKVVLNQPI</span> EN_____VTS <span style="background-color: yellow;">YTPA</span> _MQDEYGS                                                                                                                       |
| AEDAE | AYLAF <span style="background-color: yellow;">RKLVLQTP</span> PIEN_____VNS <span style="background-color: yellow;">YTPA</span> MMQDDS                                                                                                                        |
| CULQU | SYLIF <span style="background-color: yellow;">RKVILQTP</span> PIEN_____VNS <span style="background-color: yellow;">YTPA</span> MMQDDS                                                                                                                        |
| MELCN | YGV <span style="background-color: yellow;">MRKIVLSSQ</span> TGS_____LNT <span style="background-color: yellow;">YQPA</span> MQHDNSV                                                                                                                         |

|       |                                 | Number of YTPA motif(s) |
|-------|---------------------------------|-------------------------|
| DROME | TA_NVTP_____T_PTHATAIV          | 3                       |
| DROPE | PA_AAATP_____SPPPTHATTIA        | 3                       |
| DROPS | PA_AAATP_____SPPPTHATTIA        | 3                       |
| DROYA | TA_NVTP_____T_PTHATAIV          | 3                       |
| DROER | TA_NVTP_____T_PTHATAIV          | 3                       |
| DROSE | TT_NVTP_____T_PTHATAIV          | 3                       |
| DROSI | TA_NVTP_____T_PTHATAIV          | 3                       |
| DROFC | TA_NVTP_____T_PTHATAIV          | 3                       |
| DROAN | PA_QVTP_____T_PTHATAIA          | 2                       |
| DROWI | TA_ASP_____T_PTHATVA            | 1                       |
| DROVI | PAHTVQPDTHHTVQPVQPVQVA_PTHATSIA | 1                       |
| DROMO | PAQPMQP_____LHPVQVPVPT_PSHATTIA | 1                       |
| ANOGA | _____                           | 1                       |
| ANODA | _____                           | 1                       |
| AEDAE | _____                           | 1                       |
| CULQU | _____                           | 1                       |
| MELCN | _____                           | 1                       |

**(Drosophila)** DROME: *Drosophila melanogaster* (UniProtKB: Q8XSX4), DROPE: *Drosophila persimilis* (B4HD20), DROPS: *Drosophila pseudoobscura pseudoobscura* (Q29E95), DROYA: *Drosophila yakuba* (B4PIC7), DROSE: *Drosophila sechellia* (B4HUC0), DROSI: *Drosophila simulans* (B4QR38), DROFC: *Drosophila ficusphila* (A0A1W4VLR6), DROWI: *Drosophila willistoni* (B4MMW4), DROMO: *Drosophila mojavensis* (B4KXC6), **(Mosquito)** ANOGA: *Anopheles gambiae* (Q7PYM4), ANODA: *Anopheles darlingi* (W5JJ86), AEDAE: *Aedes aegypti* (Q16ZV7), CULQU: *Culex quinquefasciatus* (B0WXN7), **(Butterfly)** MELCN: *Melitaea cinxia* (MCINX001734)

The alignment was performed on OMA browser (<https://omabrowser.org/oma/>).

Izumi et al., Figure S1



**Figure S1. Multiple sequence alignment of the Hoka amino acid sequence with the homologs in *Drosophila*, mosquito, and butterfly.**

The MAFFT multiple sequence alignment was performed using the OMA browser (<https://corona.omabrowser.org/oma/home/>). The amino acid sequence of *Drosophila melanogaster* (DEOME) Hoka is shown at the top (red). Signal peptides and transmembrane regions are highlighted in yellow and gray, respectively. YTPA (Tyr-Thr-Pro-Ala) motifs are highlighted by green. Although the Hoka homolog of the butterfly *Melitaea cinxia* (MELCN) does not possess the YTPA motif, a similar motif (YQPA) is found in the cytoplasmic region. The number of YTPA/YQPA motif(s) is indicated at the end of each sequence.

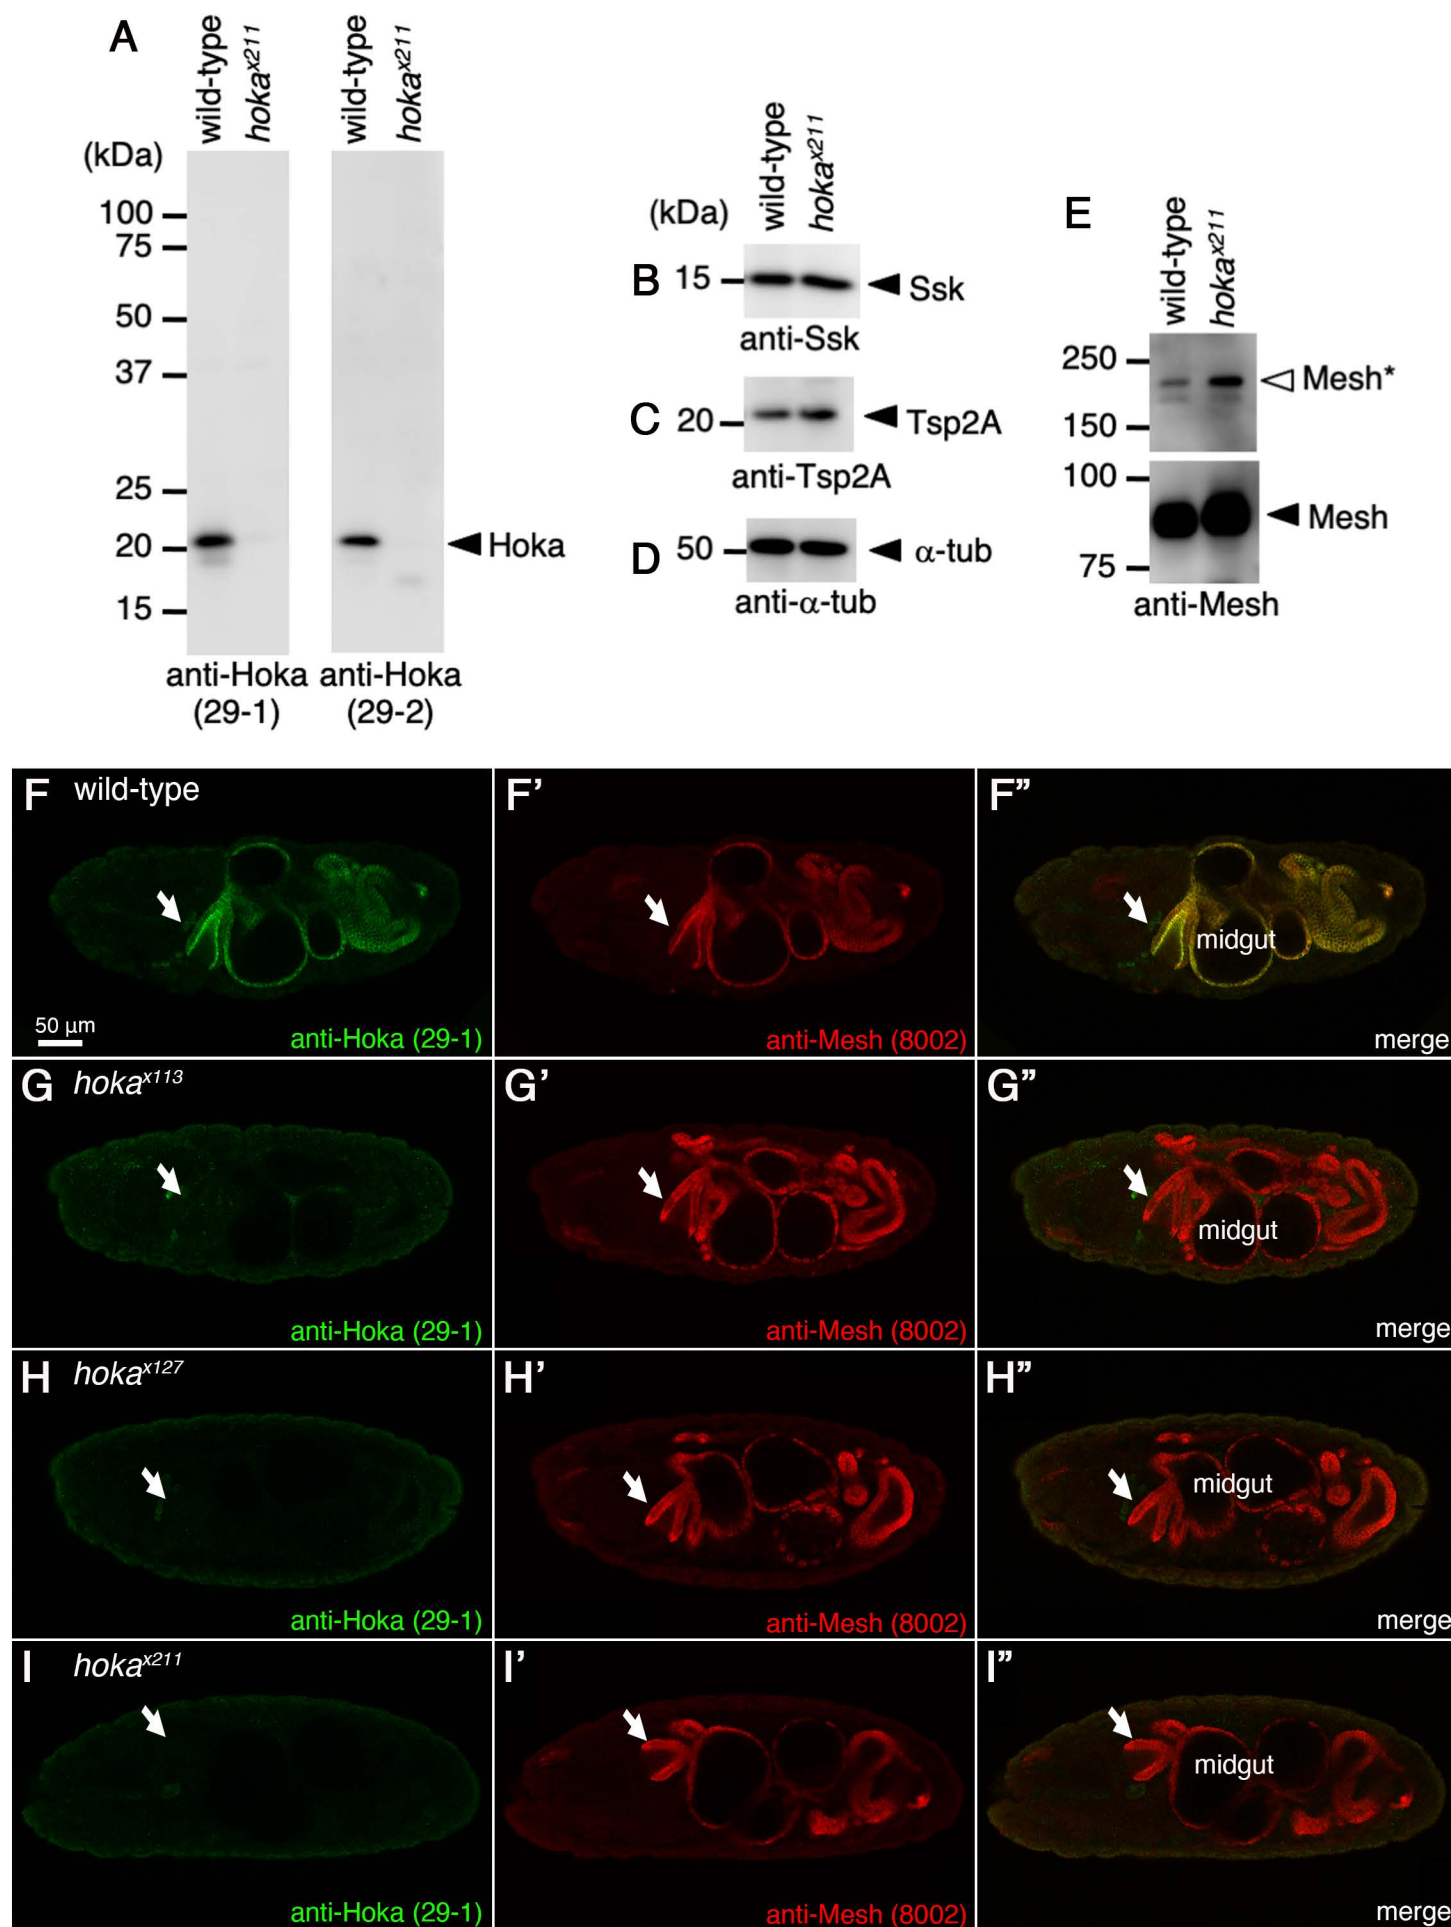

**Figure S2. Characterization of the *hoka*-mutant strains and anti-Hoka antibodies.**

(A–E) The extracts from the first-instar larva prepared from wild-type and *hoka*<sup>x211</sup>-mutants were separated on 15% (A–D) or 8% (E) SDS-polyacrylamide gels, and western blot analyses were performed using the anti-Hoka (A, left panel, 29-1; right panel, 29-2), anti-Ssk (B), anti-Tsp2A (C), anti- $\alpha$ -tubulin (D), and anti-Mesh (E) antibodies. A protein band of ~21 kDa was detected by anti-Hoka antibodies in the wild-type but not in the *hoka*<sup>x211</sup>-mutant (E; arrowheads), indicating that the ~21 kDa band represents Hoka. The density of the main bands of Ssk (~15 kDa) and Tsp2A (~21 kDa) were not significantly different in the *hoka*<sup>x211</sup>-mutant relative to the wild-type (F, G; arrowhead). The density of the main band for Mesh was slightly increased in the *hoka*<sup>x211</sup>-mutant compared to the wild-type (E; arrowhead). In the higher-molecular-mass band for Mesh, which showed a double band at ~200 kDa, the upper band (Mesh\*) was increased in the *hoka*<sup>x211</sup>-mutant compared to the wild-type (E; white arrowhead). Western blots using the anti- $\alpha$ -tubulin antibody as the loading control show that the same quantities of protein were loaded in the wild-type and *hoka*<sup>x211</sup>-mutant extracts (D).

(F–I'') Immunofluorescence staining of stage 16 wild-type (F–F''), *hoka*<sup>x113</sup> (G–G''), *hoka*<sup>x127</sup> (H–H''), or *hoka*<sup>x211</sup> (I–I'') embryos using the anti-Hoka (29-1, green) and anti-Mesh (8002, red) antibodies. The immunoreactivity of the anti-Hoka antibody (29-1) was diminished in the *hoka*<sup>x113</sup>, *hoka*<sup>x127</sup>, or *hoka*<sup>x211</sup> embryos. The arrows indicate OELPs. Bars: 50  $\mu$ m.

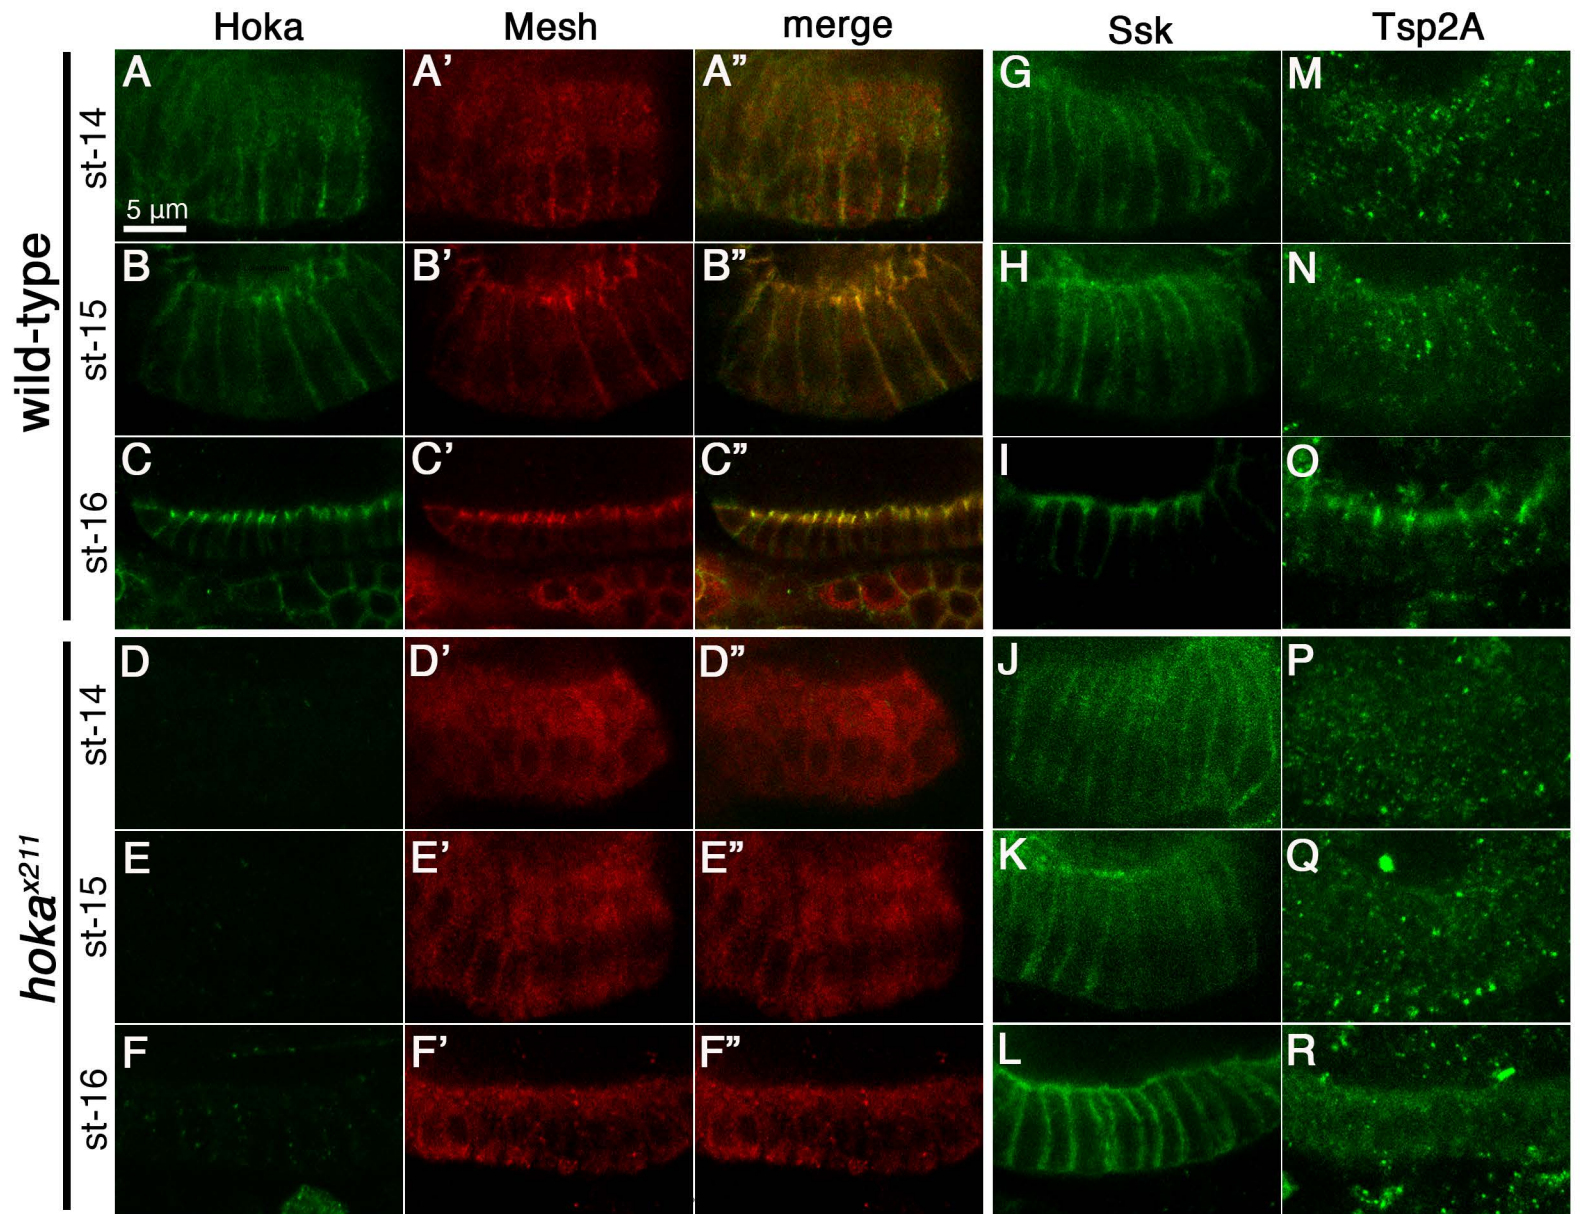

Izumi et al., Figure S3

**Figure S3. Hoka, Ssk, Mesh, and Tsp2A distribution during sSJ formation in the wild-type and *hoka<sup>x211</sup>*-mutant embryonic OELPs.**

(A–R) Immunofluorescence staining of stage 14 wild-type OELPs (A–A”, G, M), *hoka<sup>x211</sup>*-mutant OELPs (D–D”, J, P), stage 15 wild-type OELPs (B–B” and H, N), *hoka<sup>x211</sup>*-mutant OELPs (E–E”, K, Q), stage 16 wild-type OELPs (C–C”, I, O), and *hoka<sup>x211</sup>*-mutant OELPs (F–F”, L, R) with the anti-Hoka (29-1 for A–F, A”–F”), anti-Mesh (8002 for A’–F’, A”–F”), anti-Ssk (6981-1 for G–L), and anti-Tsp2A (301AP for M–R). Scale bar (A–R): 5  $\mu$ m.

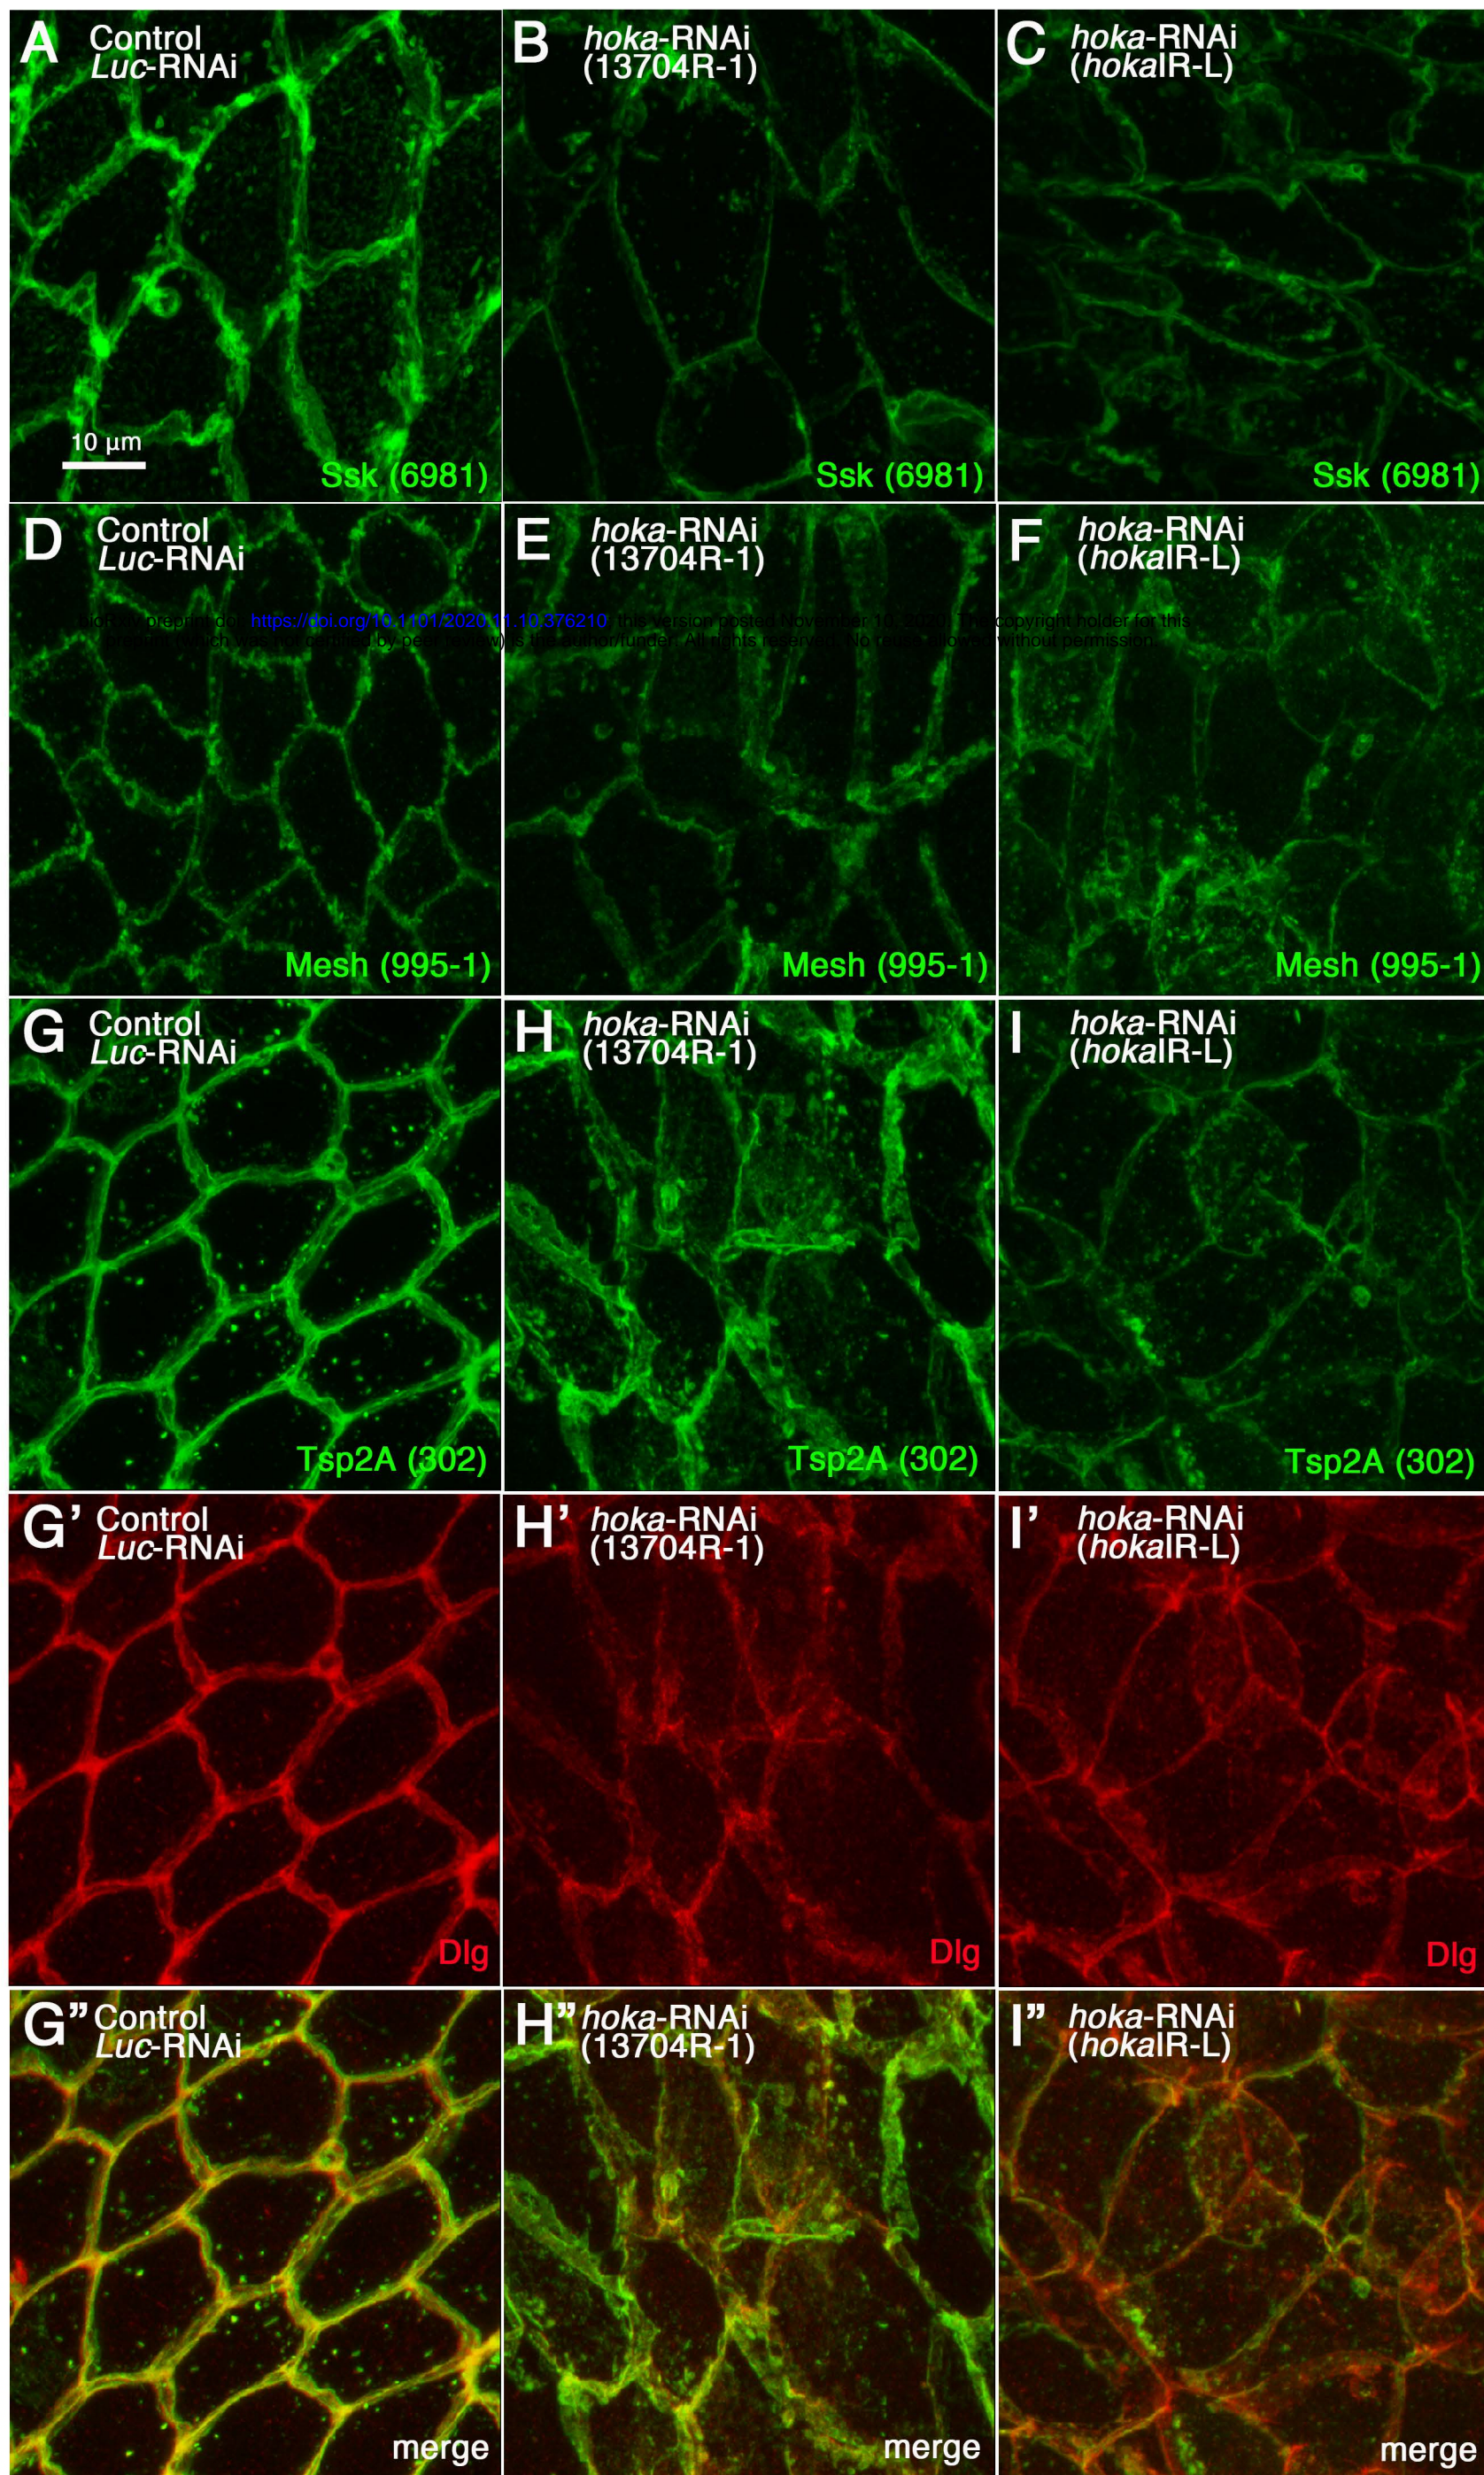

**Figure S4. The distribution of sSJ-proteins in the *hoka*-RNAi adult midgut.**

(A–I'') Confocal images of the adult posterior midgut expressing *Myo1A<sup>ts</sup>*-Gal4 with UAS-*Luc*-RNAi (control, A, D, G–G''), UAS-*hoka*-RNAi 13704R-1 (B, E, H–H''), or UAS-*hoka*-RNAi *hoka*IR-L (C, F, I–I'') at 10 days after induction and stained for Ssk (6981-1 for A–C), Mesh (995-1 for D–F), Tsp2A (302 for G–I, G''–I''), Dlg (G'–I', G''–I''). The images show the surface views of the midgut. Scale bar (A–I''): 10  $\mu$ m.

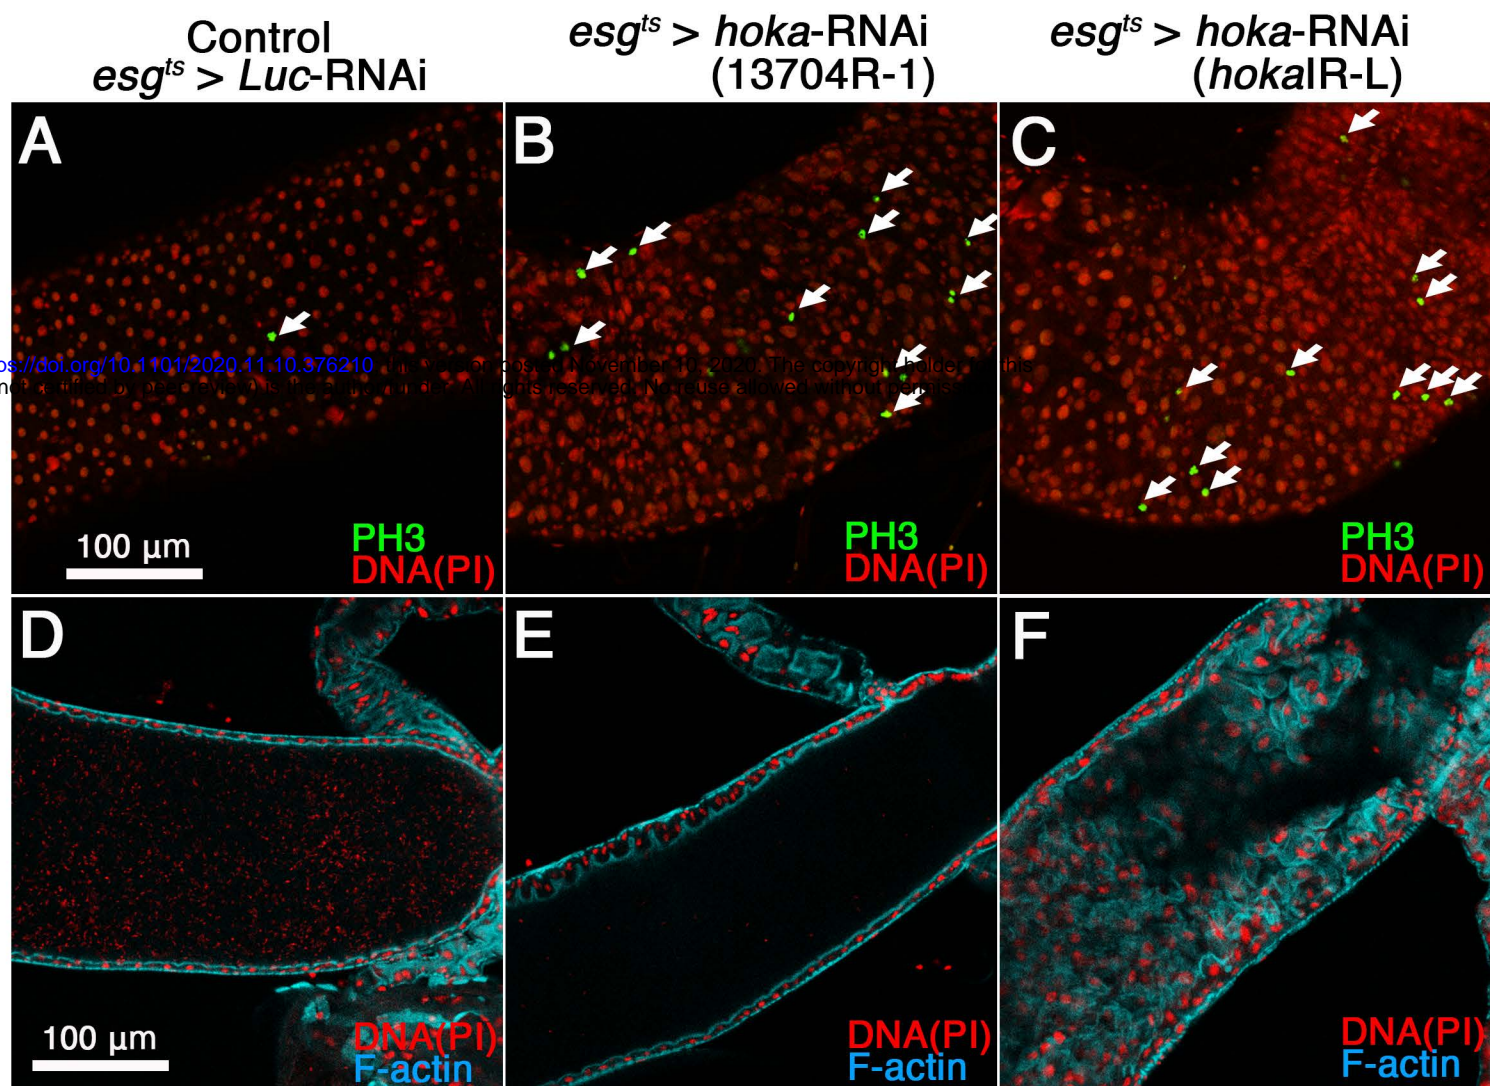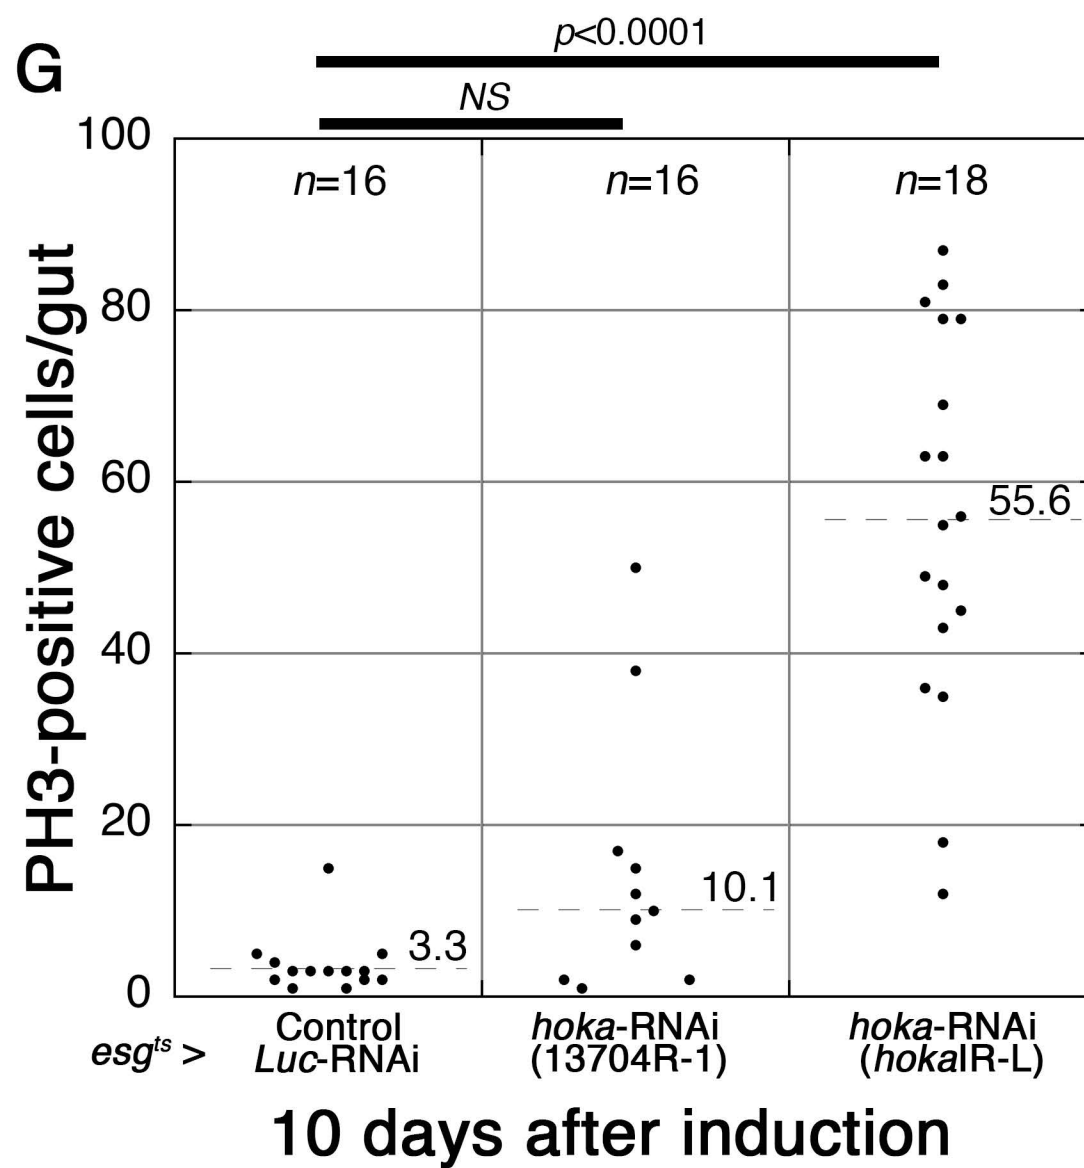



**Figure S5. The knockdown of *hoka* in progenitor cells leads to increased ISC proliferation and accumulation of ECs in the adult midgut.**

(A–C) Confocal images of the adult posterior midgut expressing *esg<sup>ts</sup>*-Gal4 with UAS-*Luc*-RNAi (control, A), UAS-*hoka*-RNAi 13704R-1 (B), or UAS-*hoka*-RNAi *hoka*IR-L (C) at 10 days after induction stained for PH3 (green, arrows) and DNA (propidium iodide) (red). The images show the surface views of the midgut. PH3-positive cells were increased in the *hoka*-RNAi midgut compared with the control midgut. Scale bar: 100  $\mu$ m.

(D–F) Confocal images of the adult posterior midgut expressing *esg<sup>ts</sup>*-Gal4 with UAS-*Luc*-RNAi (control, D), UAS-*hoka*-RNAi 13704R-1 (E), or UAS-*hoka*-RNAi *hoka*IR-L (F) at 10 days after induction and stained for DNA (propidium iodide) (red) and F-actin (blue). The images show the longitudinal cross-sections through the center of the midgut. Several ECs were accumulated in the *hoka*-RNAi *hoka*IR-L midgut lumen (F). Scale bar: 100  $\mu$ m.

(G) Quantification of PH3-positive cells. The dot-plots show the numbers of PH3-positive cells in individual midguts. Left to right: Control (*Luc*-RNAi) ( $n=16$ ), *hoka*-RNAi 13704R-1 ( $n=16$ ) and *hoka*-RNAi *hoka*IR-L ( $n=18$ ) at 10 days after induction. The bars and numbers in the graph represent the mean PH3-positive cells in the fly lines. Statistical significance ( $p<0.0001$ ) was evaluated by one-way ANOVA/Tukey's multiple comparisons tests.

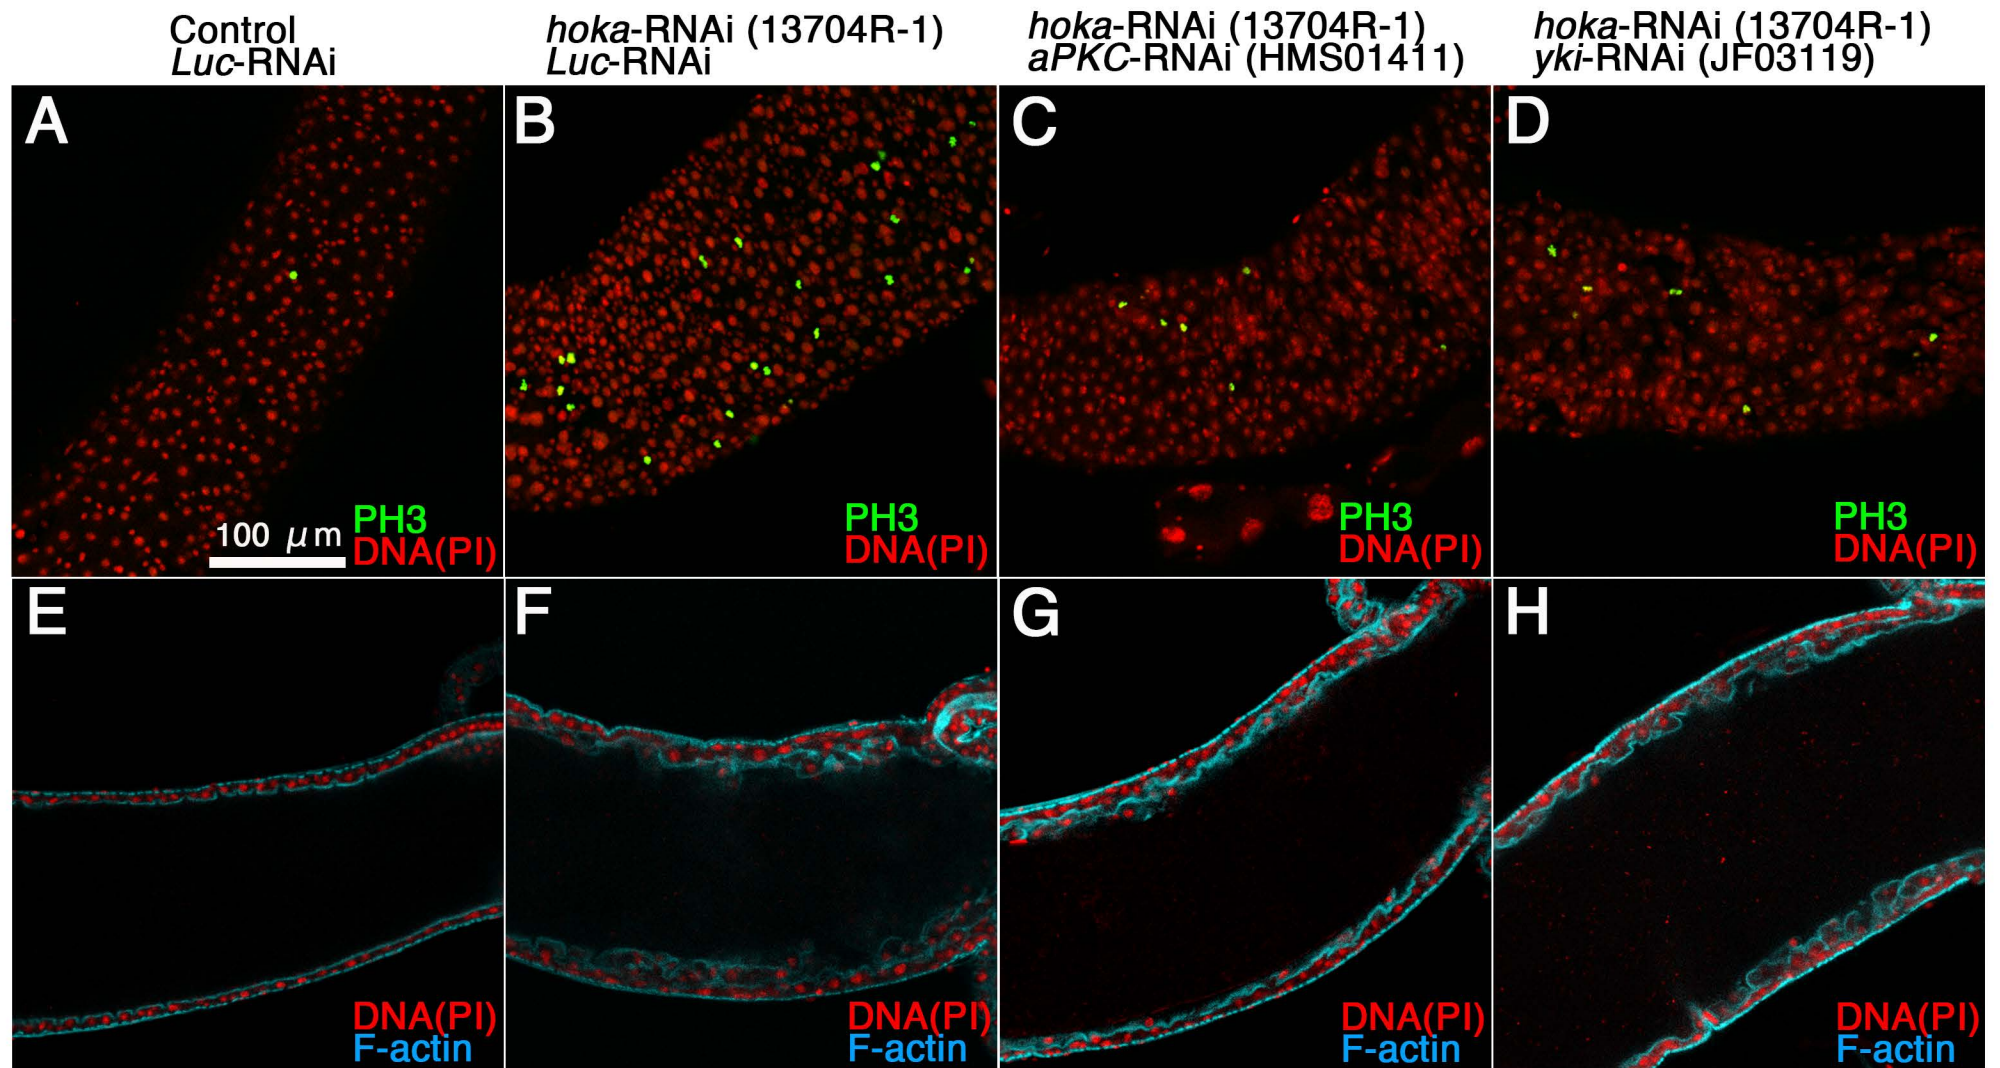

Izumi et al., Figure S6

**Figure S6. *aPKC*- and *yki*-RNAi together with *hoka*-RNAi in ECs results in reduced ISC overproliferation caused by *hoka*-RNAi.**

(A–H) Confocal images of the adult posterior midgut expressing *Myo1A<sup>ts</sup>*-Gal4 with UAS-*Luc*-RNAi (control, A, E), UAS-*hoka*-RNAi 13704R-1 together with *Luc*-RNAi (B, F), UAS-*hoka*-RNAi 13704R-1 together with *aPKC*-RNAi HMS01411 (C, G), or UAS-*hoka*-RNAi 13704R-1 together with *yki*-RNAi JF03119 (D, H) at 5 days after induction and stained for PH3 (green, A–D), DNA (propidium iodide, A–H) (red), and F-actin (E–H). The images (A–D) and (E–H) show the surface views of the midgut and longitudinal cross-sections through the center of the midgut, respectively. Scale bar (A–H): 100  $\mu$ m.
